# Supplementary material for: Construction of bright color-tunable chemiluminescent nanodots and their applications for in vivo bioimaging
Source: Royal Society of Chemistry journal article supplement (doi:10.1039/d5cc06915g), 2026-01-01
Supplement: d5cc06915g1.pdf [file d5cc06915g1.pdf]

# Supporting Information

## Construction of bright color-tunable chemiluminescent nanodots and their applications for in vivo bioimaging

*Shijie Li,<sup>†</sup> Linyi Shi,<sup>†</sup> Xiaobo Zhou,\* Ke Zhang, Lingfeng Zhao, Zhonghao Chen, Guo Li, Yuling Qin,\* Li Wu\**

Jiangsu Key Laboratory of Advanced Medical Analysis and Public Health, Nantong Key Laboratory of Public Health and Medical Analysis, School of Public Health, Nantong University, No. 9, Seyuan Road, Nantong 226019, Jiangsu, P. R. China.

E-mail: [xbzhou@ntu.edu.cn](mailto:xbzhou@ntu.edu.cn); [ylqin@ntu.edu.cn](mailto:ylqin@ntu.edu.cn); [wuli8686@ntu.edu.cn](mailto:wuli8686@ntu.edu.cn)

## Contents

|                                                                           |    |
|---------------------------------------------------------------------------|----|
| Instruments and methods .....                                             | 1  |
| Materials .....                                                           | 1  |
| Synthesis of different fluorophores.....                                  | 2  |
| Preparation of chemiluminescent nanodots .....                            | 14 |
| Fluorescence quantum yield measurement .....                              | 15 |
| Preparation of different reactive oxygen species (ROS).....               | 16 |
| Theoretical calculations .....                                            | 16 |
| Cytotoxicity test.....                                                    | 16 |
| In vivo FL and CL imaging of the mouse arthrosis inflammation model ..... | 17 |
| Histological analysis .....                                               | 17 |
| Figure S1.....                                                            | 18 |
| Figure S2.....                                                            | 19 |
| Figure S3.....                                                            | 20 |
| Figure S4.....                                                            | 21 |
| Figure S5.....                                                            | 22 |
| Figure S6.....                                                            | 22 |
| Figure S7.....                                                            | 23 |
| Figure S8.....                                                            | 23 |
| Figure S9.....                                                            | 24 |
| Figure S10.....                                                           | 25 |
| Figure S11.....                                                           | 26 |
| Figure S12.....                                                           | 27 |
| Figure S13.....                                                           | 27 |
| Figure S14.....                                                           | 28 |
| Figure S15.....                                                           | 29 |
| Figure S16.....                                                           | 30 |
| Figure S17.....                                                           | 31 |
| Figure S18.....                                                           | 32 |
| Figure S19.....                                                           | 33 |
| Figure S21.....                                                           | 35 |
| Figure S22.....                                                           | 36 |
| Figure S23.....                                                           | 37 |
| Figure S24.....                                                           | 38 |
| Figure S25.....                                                           | 39 |
| Figure S26.....                                                           | 39 |



|                                                                              |    |
|------------------------------------------------------------------------------|----|
| Figure S27 .....                                                             | 40 |
| Figure S28 .....                                                             | 40 |
| Figure S29 .....                                                             | 41 |
| Figure S30 .....                                                             | 42 |
| Figure S31 .....                                                             | 42 |
| Figure S32 .....                                                             | 43 |
| Figure S33 .....                                                             | 43 |
| Figure S34 .....                                                             | 44 |
| Figure S35 .....                                                             | 44 |
| Figure S36 .....                                                             | 45 |
| Figure S37 .....                                                             | 45 |
| Figure S38 .....                                                             | 46 |
| Figure S39 .....                                                             | 47 |
| Figure S40 .....                                                             | 48 |
| Figure S41 .....                                                             | 48 |
| Figure S42 .....                                                             | 49 |
| Figure S43 .....                                                             | 49 |
| Table S1 .....                                                               | 50 |
| Table S2 .....                                                               | 52 |
| Fluorescence quantum yield determination .....                               | 54 |
| $^1\text{H}$ NMR, $^{13}\text{C}$ NMR and MS spectra characterizations ..... | 82 |

## Instruments and methods

$^1\text{H}$  and  $^{13}\text{C}$  NMR spectra were recorded at room temperature using a Bruker UltraShield Plus 400 MHz NMR instrument. UV-Vis absorption spectra were measured on UV1900 (Shimadzu, Japan). Photoluminescence and chemiluminescence spectra were collected using an FS5 Photoluminescence Spectrometer (Edinburgh, England) with or without the input xenon lamp as the excitation source, respectively. Transmission electron microscopy (TEM) was conducted on a FEI Talos F200X TEM at an acceleration voltage of 100 kV. Dynamic light scattering (DLS) measurements were taken using a Malvern nanoparticle size zeta potential analyzer. HR-MS analyses were conducted on a 5800 proteomic analyzer (Applied Biosystems, Framingham, MA, USA). Chemiluminescence signals *in vitro* and *in vivo* were recorded using a luminescence imaging system (Tanon X6 imaging system, which is equipped with EMCCD (PIXIS-1024B\_eXcelon, Princeton) as luminescence signal detector).

## Materials

All chemicals were purchased from commercial sources and used without further purification unless otherwise stated. All solvents were purified before the experiment. Phosphate-buffered Saline (10X PBS, pH=7.4) was obtained from Beyotimes Inc. Some fluorophores with different structures for preparing POCL nanoparticles were obtained through a commercial approach. The fluorophores DPA, DPEA, Rubrene, RhB, Coumarin153, Courmarin102, BDP and Rh101 were purchased from J&K Scientific. The fluorophores BDP-590, BDP-650, and SQ640 were purchased from Lumiprobe. The cyanine dyes Cy3, Cy5, Cy7, and ICG were purchased from Sigma Aldrich. The fluorophores PFBDP, tDPA-BT, TPA-BT, TPE-BT, OTPA-BT, and SQ680 were developed in our previous works<sup>[1,2]</sup>. The fluorescent conjugated polymers PFO, PFOPV, F8BT, PFODPB, PFOHTBT, MEH-PPV, CN-PPV, PBQx-TF, and PFN-DOF were purchased from Polymer Source. F-127 and CPPO were purchased from General-Reagent.

## Synthesis of different fluorophores<sup>[1-4]</sup>

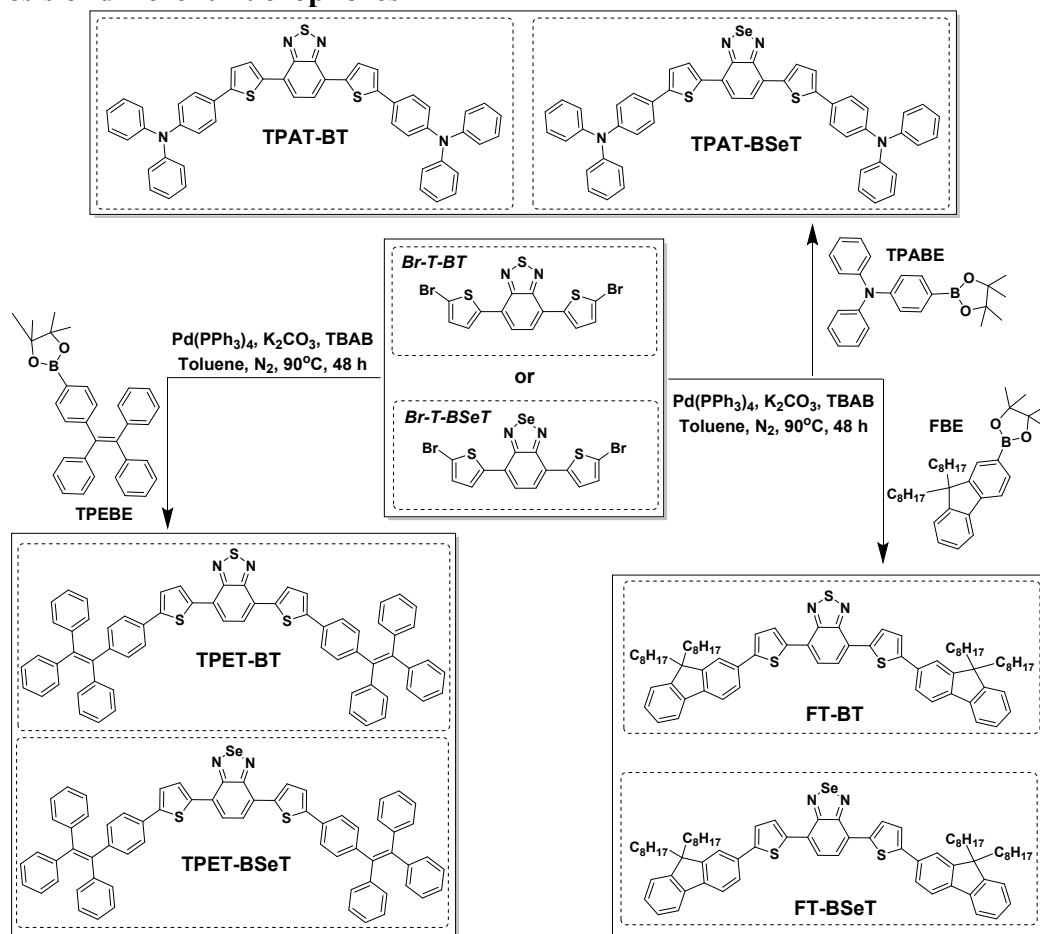

**Scheme S1.** Synthetic routes of **XT-BT** and **XT-BSeT** (**X** = Triphenylamine-**TPA**, Tetraphenyl ethylene-**TPE**, or Fluorene-**F**).

### TPAT-BT

A mixture of N,N-Diphenyl-4-(4,4,5,5-tetramethyl-1,3,2-dioxaborolan-2-yl)aniline (**TPABE**, 372 mg, 1.0 mmol), 4,7-Bis(2-bromo-5-thienyl)-2,1,3-benzothiadiazole (**Br-T-BT**, 183 mg, 0.4 mmol) and Pd(PPh<sub>3</sub>)<sub>4</sub> (6 mg, 0.025 mmol), tetrabutylammonium bromide (3 mg), 2 M K<sub>2</sub>CO<sub>3</sub> (2.5 mL) and toluene (5 mL) was heated to 90 °C and stirred in dark for 48 h. After cooling, the mixture was washed with brine and dried with anhydrous Na<sub>2</sub>SO<sub>4</sub>. Then the residue was purified by column chromatography (eluent: CH<sub>2</sub>Cl<sub>2</sub>/Petroleum ether) to give red solids. Yield: 245 mg, 78 %.

<sup>1</sup>H NMR (400 MHz, Chloroform-*d*) δ 8.02 (d, *J* = 3.9 Hz, 2H), 7.76 (s, 2H), 7.49 (d, *J* = 8.3 Hz, 4H), 7.25-7.19 (m, 10H), 7.08-6.95 (m, 16H).

$^{13}\text{C}$  NMR (101 MHz, Chloroform-*d*)  $\delta$  152.60, 147.61, 147.43, 129.39, 128.71, 128.06, 126.63, 125.64, 125.19, 124.68, 123.50, 123.27.

HR-MS (ESI)  $m/z$ : calcd for  $[\text{C}_{50}\text{H}_{34}\text{N}_4\text{S}_3]^+$  786.195, found 785.727.

### TPAT-BSeT

A mixture of **TPABE** (372 mg, 1.0 mmol), 4,7-Bis(5-bromothiophen-2-yl)benzo[*c*][1,2,5]selenadiazole (**Br-T-BSeT**, 202 mg, 0.4 mmol) and  $\text{Pd}(\text{PPh}_3)_4$  (6 mg, 0.025 mmol), tetrabutylammonium bromide (3 mg), 2 M  $\text{K}_2\text{CO}_3$  (2.5 mL) and toluene (5 mL) was heated to 90 °C and stirred in dark for 48 h. After cooling, the mixture was washed with brine and dried with anhydrous  $\text{Na}_2\text{SO}_4$ . Then the residue was purified by column chromatography (eluent:  $\text{CH}_2\text{Cl}_2$ /Petroleum ether) to give black solids. Yield: 250 mg, 75 %.

$^1\text{H}$  NMR (400 MHz, Chloroform-*d*)  $\delta$  7.94 (d,  $J$  = 3.9 Hz, 2H), 7.72 (s, 2H), 7.52-7.48 (m, 4H), 7.25-7.19 (m, 10H), 7.08-6.98 (m, 16H).

$^{13}\text{C}$  NMR (101 MHz, Chloroform-*d*)  $\delta$  147.55, 147.44, 145.79, 138.23, 129.38, 128.55, 128.20, 127.15, 126.62, 125.43, 124.64, 124.49, 124.02, 123.54, 123.23, 123.01.

HR-MS (ESI)  $m/z$ : calcd for  $[\text{C}_{50}\text{H}_{34}\text{N}_4\text{S}_2\text{Se}]^+$  834.139, found 833.647.

### TPET-BT

A mixture of 1-(4-phenylboronic acid pinacol ester)-1,2,2-triphenylethene (**TPEBE**, 458 mg, 1.0 mmol), **Br-T-BT** (183 mg, 0.4 mmol) and  $\text{Pd}(\text{PPh}_3)_4$  (6 mg, 0.025 mmol), tetrabutylammonium bromide (3 mg), 2 M  $\text{K}_2\text{CO}_3$  (2.5 mL) and toluene (5 mL) was heated to 90 °C and stirred in dark for 48 h. After cooling, the mixture was washed with brine and dried with anhydrous  $\text{Na}_2\text{SO}_4$ . Then the residue was purified by column chromatography (eluent:  $\text{CH}_2\text{Cl}_2$ /Petroleum ether) to give red solids. Yield: 326 mg, 85 %.

$^1\text{H}$  NMR (400 MHz, Chloroform-*d*)  $\delta$  8.08 (d,  $J$  = 4.0 Hz, 2H), 7.86 (s, 2H), 7.45 (d,  $J$  = 8.1 Hz, 4H), 7.36 (d,  $J$  = 3.8 Hz, 2H), 7.17-7.07 (m, 34H).

$^{13}\text{C}$  NMR (101 MHz, Chloroform-*d*)  $\delta$  142.43, 133.83, 133.59, 133.36, 133.00, 132.94, 132.77, 132.70, 132.46, 130.05, 129.80, 129.57.

HR-MS (ESI)  $m/z$ : calcd for  $[\text{C}_{66}\text{H}_{44}\text{N}_2\text{S}_3]^+$  960.267, found 959.660.

### TPET-BSeT

A mixture of **TPEBE** (458 mg, 1.0 mmol), **Br-T-BSeT** (202 mg, 0.4 mmol), and  $\text{Pd}(\text{PPh}_3)_4$  (6 mg, 0.025 mmol), tetrabutylammonium bromide (3 mg), 2 M  $\text{K}_2\text{CO}_3$  (2.5 mL), and toluene (5 mL) was heated to 90 °C and stirred in the dark for 48 h. After cooling, the mixture was washed with brine and dried with anhydrous  $\text{Na}_2\text{SO}_4$ . Then the residue was purified by column chromatography (eluent:  $\text{CH}_2\text{Cl}_2$ /Petroleum ether) to give dark purple solids. Yield: 318 mg, 79 %.

$^1\text{H}$  NMR (400 MHz, Chloroform-*d*)  $\delta$  7.97 (d,  $J$  = 3.9 Hz, 2H), 7.78 (s, 2H), 7.45 (d,  $J$  = 8.2 Hz, 4H), 7.33 (d,  $J$  = 3.9 Hz, 2H), 7.10 (dddd,  $J$  = 22.6, 12.4, 5.8, 3.2 Hz, 34H).

$^{13}\text{C}$  NMR (101 MHz, Chloroform-*d*)  $\delta$  158.12, 145.75, 143.68, 143.65, 143.55, 143.37, 141.33, 140.34, 138.78, 131.94, 131.45, 131.36, 128.38, 127.85, 127.75, 127.66, 127.18, 126.63, 126.57, 125.47, 124.90, 124.48, 124.00, 123.67.

HR-MS (ESI)  $m/z$ : calcd for  $[\text{C}_{66}\text{H}_{44}\text{N}_2\text{S}_2\text{Se}]^+$  1008.211, found 1007.621.

### FT-BT

A mixture of 9,9-Di-*n*-octylfluorene-2-boronic acid pinacol ester (**FBE**, 516 mg, 1.0 mmol), **Br-T-BT** (183 mg, 0.4 mmol) and  $\text{Pd}(\text{PPh}_3)_4$  (6 mg, 0.025 mmol), tetrabutylammonium bromide (3 mg), 2 M  $\text{K}_2\text{CO}_3$  (2.5 mL) and toluene (5 mL) was heated to 90 °C and stirred in dark for 48 h. After cooling, the mixture was washed with brine and dried with anhydrous  $\text{Na}_2\text{SO}_4$ . Then the residue was purified by column chromatography (eluent:  $\text{CH}_2\text{Cl}_2$ /Petroleum ether) to give magenta solids. Yield: 362 mg, 84 %.

$^1\text{H}$  NMR (400 MHz, Chloroform-*d*)  $\delta$  8.20-8.09 (m, 2H), 7.93 (s, 2H), 7.75-7.65 (m, 8H), 7.49 (d,  $J = 3.9$  Hz, 2H), 7.35 (t,  $J = 6.9$  Hz, 6H), 2.07-1.98 (m, 8H), 1.23-1.02 (m, 48H), 0.80 (td,  $J = 7.0, 1.7$  Hz, 12H).

$^{13}\text{C}$  NMR (101 MHz, Chloroform-*d*)  $\delta$  152.65, 151.62, 150.96, 146.49, 141.15, 140.58, 138.30, 132.88, 128.66, 127.24, 126.86, 125.78, 125.28, 124.76, 123.91, 122.90, 120.13, 120.03, 119.78, 55.22, 40.42, 31.79, 30.03, 29.71, 29.22, 23.77, 22.70, 22.59, 14.13, 14.07.

HR-MS (ESI)  $m/z$ : calcd for  $[\text{C}_{72}\text{H}_{88}\text{N}_2\text{S}_3]^+$  1076.611, found 1075.975.

### FT-BSeT

A mixture of **FBE** (516 mg, 1.0 mmol), **Br-T-BSeT** (202 mg, 0.4 mmol), and  $\text{Pd}(\text{PPh}_3)_4$  (6 mg, 0.025 mmol), tetrabutylammonium bromide (3 mg), 2 M  $\text{K}_2\text{CO}_3$  (2.5 mL), and toluene (5 mL) was heated to 90 °C and stirred in the dark for 48 h. After cooling, the mixture was washed with brine and dried with anhydrous  $\text{Na}_2\text{SO}_4$ . Then the residue was purified by column chromatography (eluent:  $\text{CH}_2\text{Cl}_2$ /Petroleum ether) to give violet solids. Yield: 355 mg, 79 %.

$^1\text{H}$  NMR (400 MHz, Chloroform-*d*)  $\delta$  7.97 (d,  $J = 3.9$  Hz, 2H), 7.78 (s, 2H), 7.69-7.56 (m, 8H), 7.40 (d,  $J = 3.9$  Hz, 2H), 7.27 (t,  $J = 6.5$  Hz, 6H), 1.95 (p,  $J = 7.4$  Hz, 8H), 1.22-0.92 (m, 48H), 0.73 (t,  $J = 7.0$  Hz, 12H).

$^{13}\text{C}$  NMR (101 MHz, Chloroform-*d*)  $\delta$  158.24, 151.61, 150.96, 146.85, 141.09, 140.63, 138.67, 133.01, 128.46, 127.30, 127.24, 126.87, 125.54, 124.73, 123.68, 122.92, 120.13, 120.04, 119.78, 58.51, 55.24, 40.45, 31.82, 30.06, 29.26, 23.79, 22.62, 18.46, 14.11.

HR-MS (ESI)  $m/z$ : calcd for  $[\text{C}_{72}\text{H}_{88}\text{N}_2\text{S}_2\text{Se}]^+$  1124.555, found 1123.874.

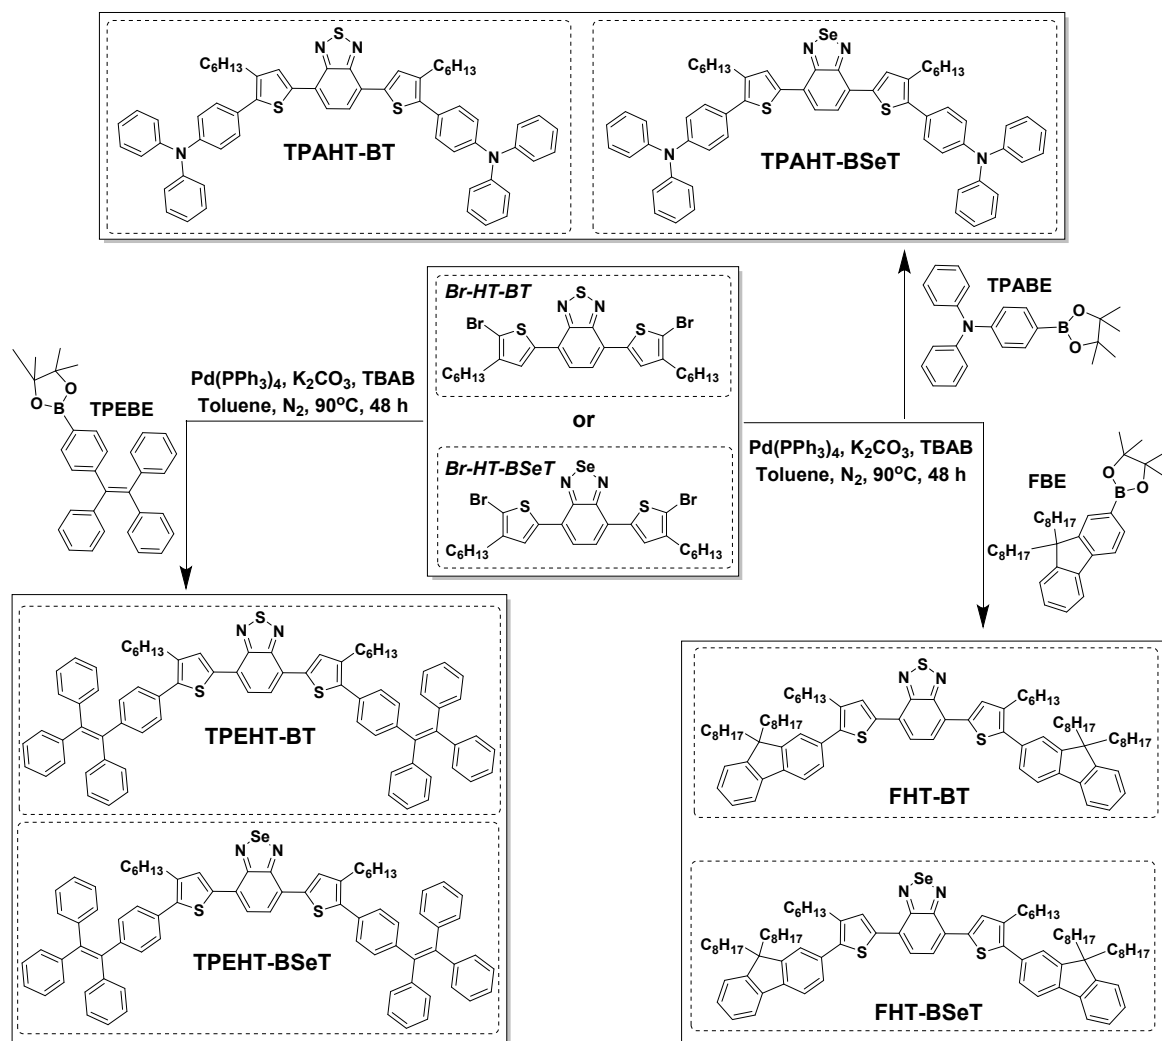

**Scheme S2.** Synthetic routes of **XHT-BT** and **XHT-BSeT** (**X** = Triphenylamine-**TPA**, Tetraphenyl ethylene-**TPE**, or Fluorene-**F**).

### TPAHT-BT

A mixture of **TPABE** (372 mg, 1.0 mmol), 4,7-Bis(5-bromo-4-hexylthiophen-2-yl)benzo[c][1,2,5]thiadiazole (**Br-HT-BT**, 250 mg, 0.4 mmol) and  $\text{Pd(PPh}_3)_4$  (6 mg, 0.025 mmol), tetrabutylammonium bromide (3 mg), 2 M  $\text{K}_2\text{CO}_3$  (2.5 mL) and toluene (5 mL) was heated to  $90^\circ\text{C}$  and stirred in dark for 48 h. After cooling, the mixture was washed with brine and dried with anhydrous  $\text{Na}_2\text{SO}_4$ . Then the residue was purified by column chromatography (eluent:  $\text{CH}_2\text{Cl}_2$ /Petroleum ether) to give magenta solids. Yield: 317 mg, 83 %.

$^1\text{H}$  NMR (400 MHz, Chloroform-*d*)  $\delta$  8.02 (s, 2H), 7.83 (s, 2H), 7.41-7.36 (m, 4H), 7.31-7.26 (m, 8H), 7.18-7.10 (m, 12H), 7.08-7.03 (m, 4H), 2.75 (t,  $J$  = 7.9 Hz, 4H), 1.72 (dt,  $J$  = 15.4, 7.5 Hz, 4H), 1.37-1.21 (m, 12H), 0.89 (td,  $J$  = 6.9, 5.7, 3.1 Hz, 6H).

$^{13}\text{C}$  NMR (101 MHz, Chloroform-*d*)  $\delta$  152.66, 147.54, 147.24, 139.39, 130.28, 129.85, 129.34, 128.15, 125.16, 124.70, 123.18, 123.04, 58.48, 31.67, 29.26, 22.64, 18.42, 14.13.

HR-MS (ESI)  $m/z$ : calcd for  $[\text{C}_{62}\text{H}_{58}\text{N}_4\text{S}_3]^+$  954.382, found 953.805.

### TPAHT-BSeT

A mixture of **TPABE** (372 mg, 1.0 mmol), 4,7-Bis(5-bromo-4-hexylthiophen-2-yl)benzo[*c*][1,2,5]selenadiazole (**Br-HT-BSeT**, 269 mg, 0.4 mmol) and  $\text{Pd}(\text{PPh}_3)_4$  (6 mg, 0.025 mmol), tetrabutylammonium bromide (3 mg), 2 M  $\text{K}_2\text{CO}_3$  (2.5 mL) and toluene (5 mL) was heated to 90 °C and stirred in dark for 48 h. After cooling, the mixture was washed with brine and dried with anhydrous  $\text{Na}_2\text{SO}_4$ . Then the residue was purified by column chromatography (eluent:  $\text{CH}_2\text{Cl}_2$ /Petroleum ether) to give dark purple solids. Yield: 250 mg, 75 %.

$^1\text{H}$  NMR (400 MHz, Chloroform-*d*)  $\delta$  7.91 (s, 2H), 7.75 (s, 2H), 7.38 (d,  $J$  = 8.3 Hz, 4H), 7.31-7.26 (m, 8H), 7.17-7.09 (m, 12H), 7.08-7.02 (m, 4H), 2.74 (t,  $J$  = 8.0 Hz, 4H), 1.75-1.66 (m, 4H), 1.38-1.26 (m, 12H), 0.91-0.86 (m, 6H).

$^{13}\text{C}$  NMR (101 MHz, Chloroform-*d*)  $\delta$  147.51, 147.17, 139.08, 130.15, 129.86, 129.33, 128.31, 125.38, 124.68, 123.16, 123.09, 58.47, 31.68, 29.26, 22.64, 18.43, 14.14.

HR-MS (ESI)  $m/z$ : calcd for  $[\text{C}_{62}\text{H}_{58}\text{N}_4\text{S}_2\text{Se}]^+$  1002.327, found 1001.693.

### TPEHT-BT

A mixture of **TPEBE** (458 mg, 1.0 mmol), **Br-HT-BT** (250 mg, 0.4 mmol), and  $\text{Pd}(\text{PPh}_3)_4$  (6 mg, 0.025 mmol), tetrabutylammonium bromide (3 mg), 2 M  $\text{K}_2\text{CO}_3$  (2.5 mL), and toluene (5 mL) was heated to 90 °C and stirred in the dark for 48 h. After cooling, the mixture was washed



with brine and dried with anhydrous Na<sub>2</sub>SO<sub>4</sub>. Then the residue was purified by column chromatography (eluent: CH<sub>2</sub>Cl<sub>2</sub>/Petroleum ether) to give crimson solids. Yield: 361 mg, 80 %.

<sup>1</sup>H NMR (400 MHz, Chloroform-*d*) δ 7.98 (s, 2H), 7.82 (s, 2H), 7.27 (s, 4H), 7.14-7.04 (m, 34H), 2.72-2.64 (m, 4H), 1.66 (p, *J* = 7.6 Hz, 4H), 1.35-1.26 (m, 12H), 0.89 (t, *J* = 6.8 Hz, 6H).

<sup>13</sup>C NMR (101 MHz, Chloroform-*d*) δ 152.66, 143.69, 143.65, 143.56, 143.00, 141.41, 140.47, 139.88, 139.52, 137.03, 132.50, 131.52, 131.45, 131.39, 131.36, 130.30, 128.30, 127.74, 127.67, 126.59, 126.55, 126.49, 125.65, 125.19, 31.61, 30.87, 29.21, 29.01, 22.64, 14.11.

HR-MS (ESI) *m/z*: calcd for [C<sub>78</sub>H<sub>68</sub>N<sub>2</sub>S<sub>3</sub>]<sup>+</sup> 1128.454, found 1127.748.

### **TPEHT-BSeT**

A mixture of **TPEBE** (458 mg, 1.0 mmol), **Br-HT-BSeT** (269 mg, 0.4 mmol) and Pd(PPh<sub>3</sub>)<sub>4</sub> (6 mg, 0.025 mmol), tetrabutylammonium bromide (3 mg), 2 M K<sub>2</sub>CO<sub>3</sub> (2.5 mL) and toluene (5 mL) was heated to 90 °C and stirred in the dark for 48 h. After cooling, the mixture was washed with brine and dried with anhydrous Na<sub>2</sub>SO<sub>4</sub>. Then the residue was purified by column chromatography (eluent: CH<sub>2</sub>Cl<sub>2</sub>/Petroleum ether) to give dark purple solids. Yield: 351 mg, 75 %.

<sup>1</sup>H NMR (400 MHz, Chloroform-*d*) δ 7.79 (s, 2H), 7.65 (s, 2H), 7.18 (d, *J* = 8.1 Hz, 4H), 7.07-6.96 (m, 34H), 2.64-2.55 (m, 4H), 1.57 (t, *J* = 7.8 Hz, 4H), 1.21 (td, *J* = 10.9, 10.1, 6.4 Hz, 12H), 0.81 (t, *J* = 6.7 Hz, 6H).

<sup>13</sup>C NMR (101 MHz, Chloroform-*d*) δ 158.27, 143.73, 143.69, 143.61, 142.95, 141.40, 140.52, 139.92, 139.57, 137.38, 132.65, 131.54, 131.49, 131.43, 131.40, 130.15, 128.32, 127.79, 127.77, 127.70, 127.13, 126.62, 126.58, 126.52, 125.39, 31.65, 30.91, 29.26, 29.02, 22.69, 14.16.

HR-MS (ESI) *m/z*: calcd for [C<sub>78</sub>H<sub>68</sub>N<sub>2</sub>S<sub>2</sub>Se]<sup>+</sup> 1176.399, found 1175.668.

### FHT-BT

A mixture of **FBE** (516 mg, 1.0 mmol), **Br-HT-BT** (250 mg, 0.4 mmol), and Pd(PPh<sub>3</sub>)<sub>4</sub> (6 mg, 0.025 mmol), tetrabutylammonium bromide (3 mg), 2 M K<sub>2</sub>CO<sub>3</sub> (2.5 mL), and toluene (5 mL) was heated to 90 °C and stirred in the dark for 48 h. After cooling, the mixture was washed with brine and dried with anhydrous Na<sub>2</sub>SO<sub>4</sub>. Then the residue was purified by column chromatography (eluent: CH<sub>2</sub>Cl<sub>2</sub>/Petroleum ether) to give magenta solids. Yield: 423 mg, 85 %.

<sup>1</sup>H NMR (400 MHz, Chloroform-*d*) δ 8.06 (s, 2H), 7.89 (s, 2H), 7.78-7.71 (m, 4H), 7.53-7.47 (m, 4H), 7.39-7.31 (m, 6H), 2.79 (t, *J* = 7.9 Hz, 4H), 2.00 (t, *J* = 8.2 Hz, 8H), 1.74 (p, *J* = 7.6 Hz, 4H), 1.41-1.03 (m, 60H), 0.89-0.85 (m, 6H), 0.81 (t, *J* = 7.0 Hz, 12H).

<sup>13</sup>C NMR (101 MHz, Chloroform-*d*) δ 152.67, 151.64, 150.98, 146.52, 141.17, 140.60, 138.32, 132.89, 128.67, 127.27, 126.89, 125.81, 125.33, 124.77, 123.94, 122.93, 120.16, 120.05, 119.81, 55.25, 40.45, 31.82, 30.06, 29.74, 29.26, 23.79, 22.63, 14.11.

HR-MS (ESI) *m/z*: calcd for [C<sub>84</sub>H<sub>112</sub>N<sub>2</sub>S<sub>3</sub>]<sup>+</sup> 1244.799, found 1244.0026.

### FHT-BSeT

A mixture of **FBE** (516 mg, 1.0 mmol), **Br-HT-BSeT** (269 mg, 0.4 mmol), and Pd(PPh<sub>3</sub>)<sub>4</sub> (6 mg, 0.025 mmol), tetrabutylammonium bromide (3 mg), 2 M K<sub>2</sub>CO<sub>3</sub> (2.5 mL), and toluene (5 mL) was heated to 90 °C and stirred in the dark for 48 h. After cooling, the mixture was washed with brine and dried with anhydrous Na<sub>2</sub>SO<sub>4</sub>. Then the residue was purified by column chromatography (eluent: CH<sub>2</sub>Cl<sub>2</sub>/Petroleum ether) to give dull purple solids. Yield: 355 mg, 79 %.

<sup>1</sup>H NMR (400 MHz, Chloroform-*d*) δ 7.97 (d, *J* = 3.9 Hz, 2H), 7.78 (s, 2H), 7.69-7.56 (m, 8H), 7.40 (d, *J* = 3.9 Hz, 2H), 7.27 (t, *J* = 6.5 Hz, 6H), 1.95 (p, *J* = 7.4 Hz, 8H), 1.22-0.92 (m, 48H), 0.73 (t, *J* = 7.0 Hz, 12H).

$^{13}\text{C}$  NMR (101 MHz, Chloroform-*d*)  $\delta$  158.24, 151.61, 150.96, 146.85, 141.09, 140.63, 138.67, 133.01, 128.46, 127.30, 127.24, 126.87, 125.54, 124.73, 123.68, 122.92, 120.13, 120.04, 119.78, 58.51, 55.24, 40.45, 31.82, 30.06, 29.26, 23.79, 22.62, 18.46, 14.11.

HR-MS (ESI)  $m/z$ : calcd for  $[\text{C}_{72}\text{H}_{88}\text{N}_2\text{S}_2\text{Se}]^+$  1124.555, found 1123.874.

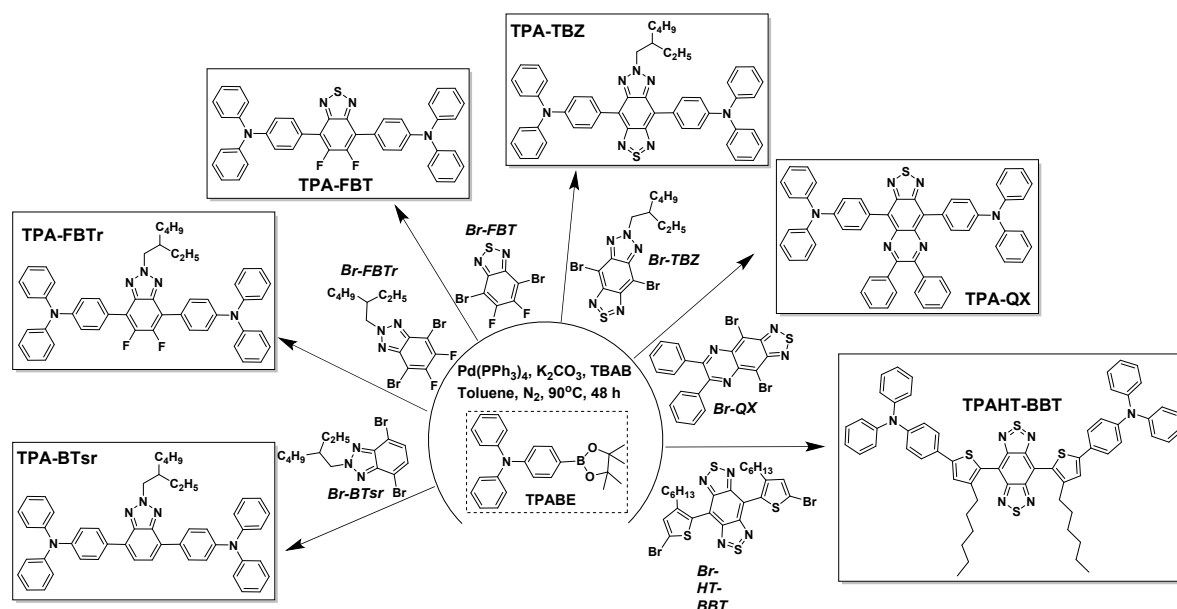

**Scheme S3.** Synthetic routes of TPA-X (X = BTr, FBTr, FBT, TBZ, QX or HT-BBT).

### TPA-BTr

A mixture of **TPABE** (372 mg, 1.0 mmol), 4,7-dibromo-2-(2-ethylhexyl)-2H-benzo[d][1,2,3]triazole (**Br-BTr**, 155 mg, 0.4 mmol) and  $\text{Pd}(\text{PPh}_3)_4$  (6 mg, 0.025 mmol), tetrabutylammonium bromide (3 mg), 2 M  $\text{K}_2\text{CO}_3$  (2.5 mL) and toluene (5 mL) was heated to 90 °C and stirred in dark for 48 h. After cooling, the mixture was washed with brine and dried with anhydrous  $\text{Na}_2\text{SO}_4$ . The residue was purified by column chromatography (eluent:  $\text{CH}_2\text{Cl}_2$ /Petroleum ether) to give light-green solids. Yield: 232 mg, 81 %.

$^1\text{H}$  NMR (400 MHz, Chloroform-*d*)  $\delta$  7.93 (d,  $J$  = 8.2 Hz, 4H), 7.52 (s, 2H), 7.22 (t,  $J$  = 7.7 Hz, 8H), 7.11 (d,  $J$  = 8.0 Hz, 12H), 6.98 (d,  $J$  = 7.5 Hz, 4H), 4.62 (d,  $J$  = 6.9 Hz, 2H), 2.22 (q,  $J$  = 6.3 Hz, 1H), 1.34-1.21 (m, 8H), 0.87 (t,  $J$  = 7.4 Hz, 3H), 0.78 (t,  $J$  = 7.1 Hz, 3H).

$^{13}\text{C}$  NMR (101 MHz, Chloroform-*d*)  $\delta$  147.65, 147.54, 143.38, 131.20, 129.32, 129.19, 124.72, 123.76, 123.39, 123.09, 59.83, 40.39, 30.54, 28.43, 23.95, 22.99, 14.06, 10.55.

HR-MS (ESI)  $m/z$ : calcd for  $[C_{50}H_{47}N_5]^+$  717.3831, found 717.3830.

### TPA-FBTr

A mixture of **TPABE** (372 mg, 1.0 mmol), 4,7-Dibromo-2-(2-ethyl-hexyl)-5,6-difluoro-2H-benzotriazole (**Br-BTr**, 170 mg, 0.4 mmol) and  $Pd(PPh_3)_4$  (6 mg, 0.025 mmol), tetrabutylammonium bromide (3 mg), 2 M  $K_2CO_3$  (2.5 mL) and toluene (5 mL) was heated to 90 °C and stirred in dark for 48 h. After cooling, the mixture was washed with brine and dried with anhydrous  $Na_2SO_4$ . The residue was purified by column chromatography (eluent:  $CH_2Cl_2$ /Petroleum ether) to give light-green solids. Yield: 226 mg, 75 %.

$^1H$  NMR (400 MHz, Chloroform- $d$ )  $\delta$  7.89-7.84 (m, 4H), 7.30 (dd,  $J = 8.5, 7.2$  Hz, 8H), 7.22-7.17 (m, 12H), 7.10-7.05 (m, 4H), 4.61 (d,  $J = 7.0$  Hz, 2H), 2.21 (t,  $J = 6.3$  Hz, 1H), 1.36-1.29 (m, 8H), 0.91 (t,  $J = 7.4$  Hz, 3H), 0.85 (d,  $J = 6.9$  Hz, 3H).

$^{13}C$  NMR (101 MHz, Chloroform- $d$ )  $\delta$  148.01, 147.42, 139.25, 131.05, 129.39, 125.14, 124.27, 123.46, 122.23, 58.49, 40.30, 28.35, 23.92, 22.96, 18.44, 14.02, 10.50.

HR-MS (ESI)  $m/z$ : calcd for  $[C_{50}H_{45}F_2N_5]^+$  753.3643, found 757.3704.

### TPA-FBT

A mixture of **TPABE** (372 mg, 1.0 mmol), 4,7-dibromo-5,6-difluorobenzo[c][1,2,5]thiadiazole (**Br-FBT**, 131 mg, 0.4 mmol) and  $Pd(PPh_3)_4$  (6 mg, 0.025 mmol), tetrabutylammonium bromide (3 mg), 2 M  $K_2CO_3$  (2.5 mL) and toluene (5 mL) was heated to 90 °C and stirred in dark for 48 h. After cooling, the mixture was washed with brine and dried with anhydrous  $Na_2SO_4$ . Then the residue was purified by column chromatography (eluent:  $CH_2Cl_2$ /Petroleum ether) to give orange solids. Yield: 208 mg, 79 %.

$^1H$  NMR (400 MHz, Chloroform- $d$ )  $\delta$  7.73 (d,  $J = 8.6$  Hz, 4H), 7.33-7.28 (m, 8H), 7.23-7.17 (m, 12H), 7.11-7.07 (m, 4H).

$^{13}\text{C}$  NMR (101 MHz, Chloroform-*d*)  $\delta$  148.48, 147.26, 131.35, 129.45, 125.30, 123.67, 123.26, 121.82.

HR-MS (ESI)  $m/z$ : calcd for  $[\text{C}_{42}\text{H}_{28}\text{F}_2\text{N}_4\text{S}]^+$  658.2003, found 658.1999.

### TPA-TBZ

A mixture of **TPABE** (372 mg, 1.0 mmol), 4,8-dibromo-6-(2-ethylhexyl)-[1,2,5]thiadiazolo[3,4-*f*]benzotriazole (**Br-TBZ**, 179 mg, 0.4 mmol) and  $\text{Pd}(\text{PPh}_3)_4$  (6 mg, 0.025 mmol), tetrabutylammonium bromide (3 mg), 2 M  $\text{K}_2\text{CO}_3$  (2.5 mL) and toluene (5 mL) was heated to 90 °C and stirred in dark for 48 h. After cooling, the mixture was washed with brine and dried with anhydrous  $\text{Na}_2\text{SO}_4$ . Then the residue was purified by column chromatography (eluent:  $\text{CH}_2\text{Cl}_2$ /Petroleum ether) to give dark blue solids. Yield: 229 mg, 74 %.

$^1\text{H}$  NMR (400 MHz,  $\text{C}_6\text{D}_6$ )  $\delta$  8.74 (d,  $J = 8.8$  Hz, 4H), 7.40 (d,  $J = 8.4$  Hz, 4H), 7.14-7.09 (m, 8H), 7.07-7.01 (m, 8H), 6.87 (dd,  $J_1, J_2 = 7.2$  Hz, 4H), 4.41 (d,  $J = 6.8$  Hz, 4H), 2.05-1.95 (m, 1H), 1.50-1.40 (m, 2H), 1.25-1.15 (m, 6H), 0.78 (t,  $J = 6.2$  Hz, 3H), 0.70 (t,  $J = 7.4$  Hz, 3H).

$^{13}\text{C}$  NMR (101 MHz,  $\text{C}_6\text{D}_6$ )  $\delta$  153.40, 152.55, 148.17, 147.88, 139.15, 134.62, 130.15, 129.36, 125.15, 123.16, 121.82, 64.16, 36.47, 34.06, 32.01, 30.10, 25.96, 22.80, 14.06.

HR-MS (ESI)  $m/z$ : calcd for  $[\text{C}_{50}\text{H}_{45}\text{N}_7\text{S}+\text{H}]^+$  776.3491, found 776.3530.

### TPA-QX

A mixture of **TPABE** (372 mg, 1.0 mmol), 4,9-Dibromo-6,7-diphenyl-[1,2,5]thiadiazolo[3,4-*g*]quinoxaline (**Br-QX**, 200 mg, 0.4 mmol) and  $\text{Pd}(\text{PPh}_3)_4$  (6 mg, 0.025 mmol), tetrabutylammonium bromide (3 mg), 2 M  $\text{K}_2\text{CO}_3$  (2.5 mL) and toluene (5 mL) was heated to 90 °C and stirred in dark for 48 h. After cooling, the mixture was washed with brine and dried

with anhydrous Na<sub>2</sub>SO<sub>4</sub>. Then the residue was purified by column chromatography (eluent: CH<sub>2</sub>Cl<sub>2</sub>/Petroleum ether) to give dark blue solids. Yield: 91 mg, 28 %.

<sup>1</sup>H NMR (400 MHz, C<sub>6</sub>D<sub>6</sub>) δ 8.17 (d, *J* = 8.4 Hz, 4H), 7.77-7.68 (m, 4H), 7.42 (d, *J* = 8.4 Hz, 4H) 7.17-7.02 (m, 26H), 6.89 (m, 4H).

<sup>13</sup>C NMR (101 MHz, C<sub>6</sub>D<sub>6</sub>) δ 153.39, 152.56, 148.17, 147.88, 139.14, 136.28, 134.61, 130.15, 129.36, 129.14, 129.06, 128.86, 128.06, 127.59, 125.15, 123.16, 121.82.

HR-MS (ESI) *m/z*: calcd for [C<sub>56</sub>H<sub>38</sub>N<sub>6</sub>S+H]<sup>+</sup> 827.2879, found 827.2954.

### TPAHT-BBT

A mixture of **TPABE** (372 mg, 1.0 mmol), 4,9-Dibromo-6,7-diphenyl-[1,2,5]thiadiazolo[3,4-*g*]quinoxaline (**Br-QX**, 200 mg, 0.4 mmol) and Pd(PPh<sub>3</sub>)<sub>4</sub> (6 mg, 0.025 mmol), tetrabutylammonium bromide (3 mg), 2 M K<sub>2</sub>CO<sub>3</sub> (2.5 mL) and toluene (5 mL) was heated to 90 °C and stirred in dark for 48 h. After cooling, the mixture was washed with brine and dried with anhydrous Na<sub>2</sub>SO<sub>4</sub>. Then the residue was purified by column chromatography (eluent: CH<sub>2</sub>Cl<sub>2</sub>/Petroleum ether) to give dark green solids. Yield: 157 mg, 39 %.

<sup>1</sup>H NMR (400 MHz, C<sub>6</sub>D<sub>6</sub>) δ 7.55 (d, *J* = 8.4 Hz, 4H), 7.34 (s, 2H), 7.42 (d, *J* = 8.4 Hz, 4H) 7.13-7.03 (m, 20H), 6.87 (dd, *J*<sub>1</sub> = 7.2 Hz, *J*<sub>2</sub> = 6.8 Hz, 4H), 2.72 (t, *J* = 7.6 Hz, 4H), 1.72-1.60 (m, 4H), 1.15-0.97 (m, 12H), 0.73 (t, *J* = 6.8 Hz, 4H).

<sup>13</sup>C NMR (101 MHz, C<sub>6</sub>D<sub>6</sub>) δ 153.21, 146.60, 145.46, 143.94, 143.78, 143.59, 141.50, 140.68, 132.72, 132.25, 131.58, 129.85, 125.54, 125.27, 116.20, 31.58, 30.66, 30.30, 29.15, 22.53, 13.92.

HR-MS (ESI) *m/z*: calcd for [C<sub>62</sub>H<sub>56</sub>N<sub>6</sub>S<sub>4</sub>] 1012.3449, found 1012.3478.

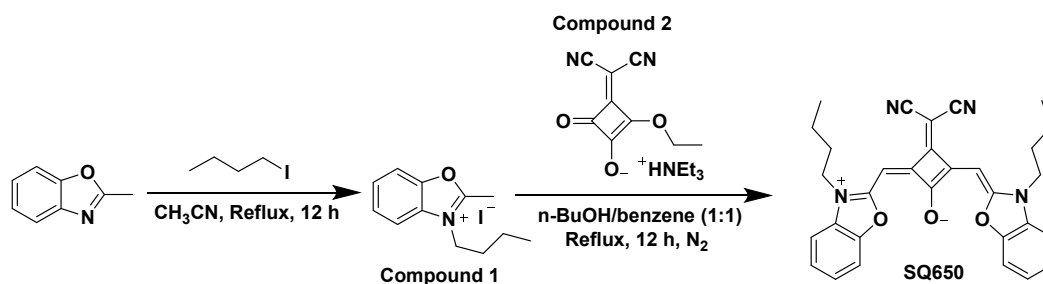

**Scheme S4.** Synthetic route of SQ650.

### SQ650

A mixture of 2-methylbenzoxazole (1.33 g, 10 mmol) and 1-iodobutane (3.68 g, 20 mmol) was heated to reflux in acetonitrile for 12 h. After cooling to room temperature, the solvent was removed by filtration, and the solids were washed with cool acetonitrile three times to yield compound 1 (2.85 g, 90%) as a purple solid. The compound 1 was used in the next step without further purification.

A mixture of 189 mg (0.5 mmol) of compound 2, 380 mg (1.2 mmol) of compound 1, and the mixed solvent of n-butanol and benzene (1:1, 6 mL) was heated to reflux under N<sub>2</sub> using a Dean-Stark trap for 12 h. The solvent was then evaporated, and the residue was purified by column chromatography (eluent: DCM/MeOH). Subsequently, the residue was precipitated from DCM/hexane solutions to afford the pure purple solid. Yield: 102 mg, 20 %.

### Preparation of chemiluminescent nanodots<sup>[5]</sup>

A mixture of organic luminophor with a different structure (0.1 mg), F-127 (4.4 mg), CPPO (0.5 mg), and THF (0.5 mL) was sonicated to obtain a clear solution. Then the mixture was swiftly injected into DI water (4 mL), stirred in a fume hood for 1h, and concentrated under vacuum to remove THF. Then, a membrane filter (Pore Size = 0.22 μm) was used to filter the solution, yielding water-dispersed nanoparticles. The prepared nanoparticles were stored at 4 °C for further usage.

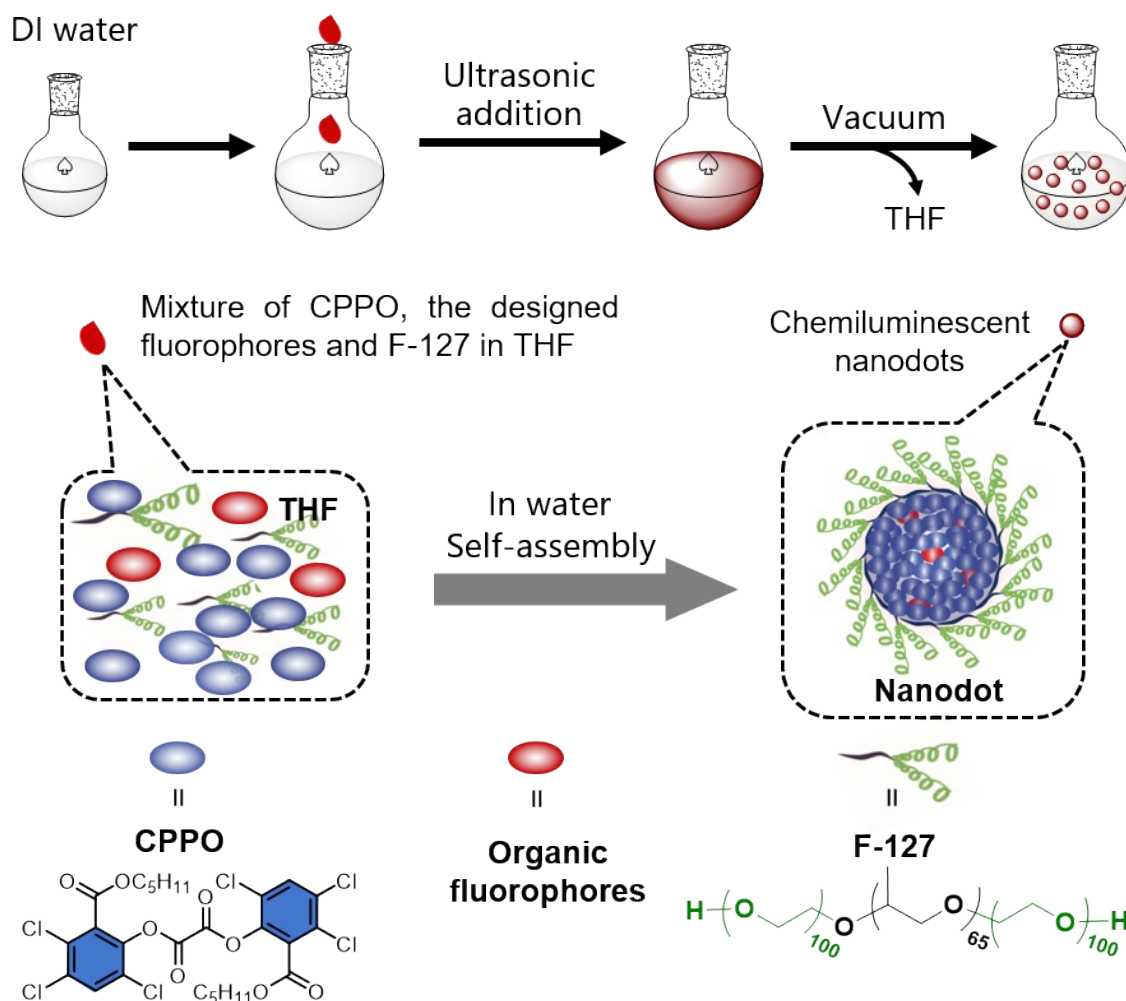

**Scheme S5.** Schematic illustration of the preparation with different fluorophores and CPPO co-doped nanoparticles (water-dispersible POCL system) using F-127 as a loading matrix.

#### Fluorescence quantum yield measurement<sup>[6]</sup>

Coumarin 102 in ethanol (QY = 78%) , FITC dissolved in pH 8 PBS (QY = 90%) , and Rh101 in ethanol (QY = 91%) were chosen as the reference fluorophores to measure the quantum yield of different fluorophores. The quantum yield was calculated as follows :

$$\phi = \phi_{ref} \times \left( \frac{n_{sample}^2}{n_{ref}^2} \right) \left( \frac{I_{sample}}{A_{sample}} \right) \left( \frac{A_{ref}}{I_{ref}} \right) \quad (1)$$

Different concentrations at or below OD 0.1 were measured, and the integrated fluorescence was plotted against absorbance for every fluorescent molecule. Comparison of the slopes yielded the quantum yield of the fluorophore.

#### Preparation of different reactive oxygen species (ROS)<sup>[5,7]</sup>



$H_2O_2$ : Commercial  $H_2O_2$  solution (30 % in  $H_2O_2$ ) was diluted to 1 M  $H_2O_2$ , then 50  $\mu$ L of the diluted solution was added to 1950  $\mu$ L of the diluted solution; the final concentration is 25 mM.

$ClO^-$ : Hypochlorite stock solution was prepared by dilution of commercial NaClO. 3.72 mg of solid NaClO was added to 5 mL of water to form a 10 mM NaClO solution. Then, 50  $\mu$ L of the solution was added to 1950  $\mu$ L of the solution, yielding a final concentration of 250  $\mu$ M.

$O_2^-$ : 3.5 mg of Solid  $KO_2$  was added to 5 mL of water to form a 10 mM solution directly; then 50  $\mu$ L of the solution was added to 1950  $\mu$ L of the solution, yielding a final concentration of 250  $\mu$ M.

$ONOO^-$ : Peroxynitrite stock was prepared following the literature procedure and assayed using a spectrophotometer using  $\epsilon_{302\text{ nm}} = 1670\text{ cm}^{-1}\text{M}^{-1}$ .

$\cdot OH$ : Hydroxy radical was generated in situ by the addition of 2 mL 50 mM  $FeSO_4$  stock solution into a solution containing excess  $H_2O_2$  through Fenton chemistry, then 50  $\mu$ L of the solution was added to 1950  $\mu$ L solution, the final concentration is 250  $\mu$ M.

### Theoretical calculations

All theoretical calculations were conducted using the Gaussian 09 suite.<sup>[8]</sup> Geometry optimizations of all organic dyes and DOD were performed using density functional theory (DFT) with B3LYP/6-31G (d) basis set. Then Multiwfn and VMD<sup>[9,10]</sup> were used to observe orbitals and map orbital distributions.

### Cytotoxicity test

*In vitro* cytotoxicity was measured using a standard methyl thiazolyl tetrazolium (MTT, Sigma Aldrich) assay in HeLa cell lines. Cells growing in log phase were seeded into a 96-well cell culture plate at  $1 \times 10^4$ /well. Then, TPAHT-BT CLdot were added to the wells of the treatment group at concentrations of 0, 25, 50, 100, 200, 400, 600, and 1000  $\mu$ g/mL. For the negative control group, 1  $\mu$ L/well of solvent was diluted in DMEM with a final concentration of 1 %.

The cells were incubated for 24 h at 37 °C under 5 % CO<sub>2</sub>. The combined MTT/PBS solution was added to each well of the 96-well assay plate and incubated for an additional 4 h. After removal of the culture solution, 200 µL DMSO was added to each well, and the plate was shaken for 10 min at the shaking table. An enzyme-linked immunosorbent assay (ELISA) reader was used to measure the OD<sub>570</sub> (absorbance) of each well, with 490 nm as the reference wavelength. The following formula was used to calculate the viability of cell growth:

Viability (%) = (mean of absorbance value of treatment group/mean of absorbance value of control) × 100

### **In vivo FL and CL imaging of the mouse arthrosis inflammation model**

Animal experiments were conducted according to the guidelines of the Institutional Animal Care and Use Committee, Laboratory Animal Center, Nantong University (P20250226-024). The arthrosis inflammation model in mice was established by intra-articular injection of 20 mM hydrogen peroxide (5 µL). Then, 20 µL of TPAHT-BT CLdot (3 mg/mL) were injected into the arthritic joints of mice after 1 minute. Then the mice were transferred into the homemade CL imaging system we fabricated for CL imaging without a light source. At least 3 mice were used as parallel controls in each imaging experiment. A red LED light was used as the excitation light, and a 792 band-pass filter was adopted for FL imaging.

### **Histological analysis**

After intravenous injection of TPAHT-BT CLdot, the organs were harvested and fixed in 4% paraformaldehyde for H&E staining analysis, embedded in paraffin, sectioned, and stained with hematoxylin and eosin. The sections were observed under an optical microscope.

**Reported fluorophores for constructing of water-dispersible POCL system**

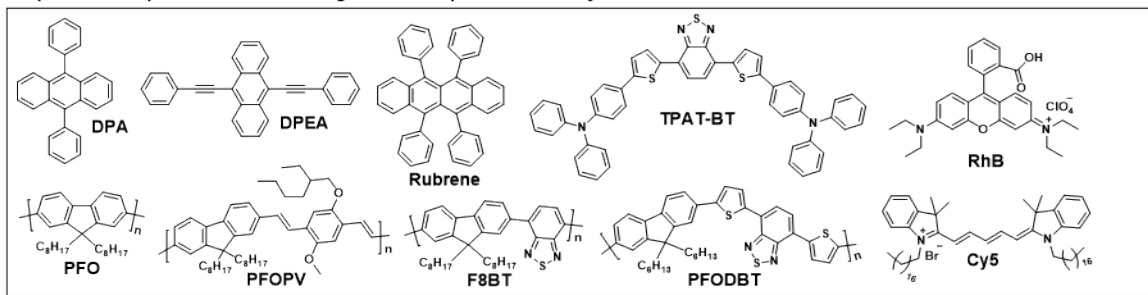

**The fluorophores designed in this work for constructing of water-dispersible POCL system**

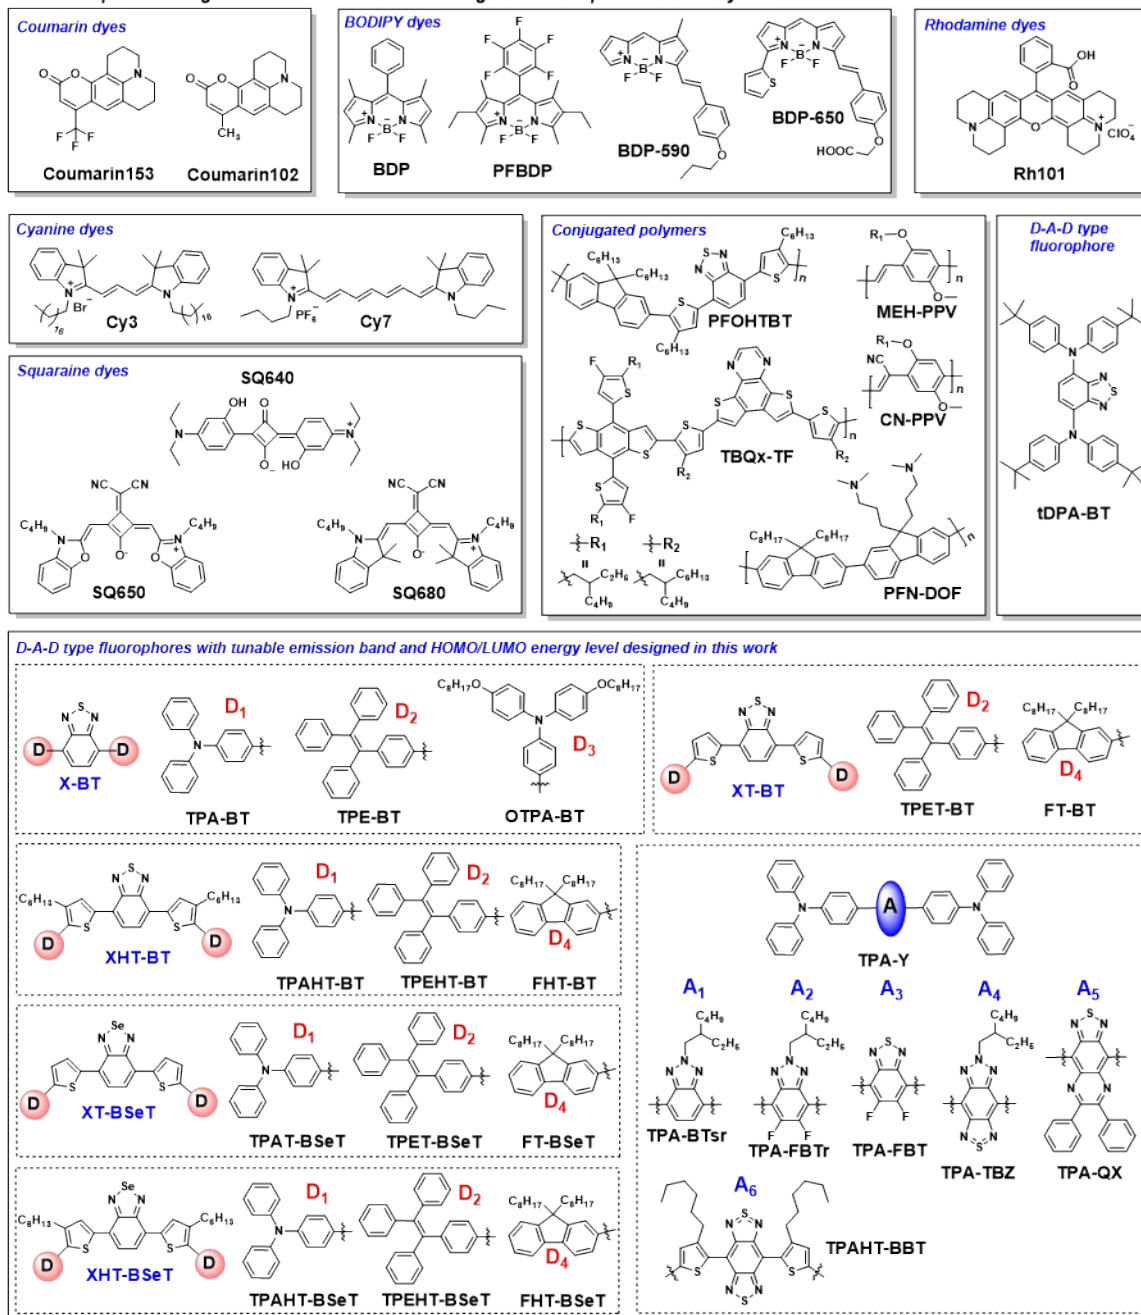

**Figure S1.** Chemical structures of the dyes used for constructing water-dispersible POCL nanoparticles

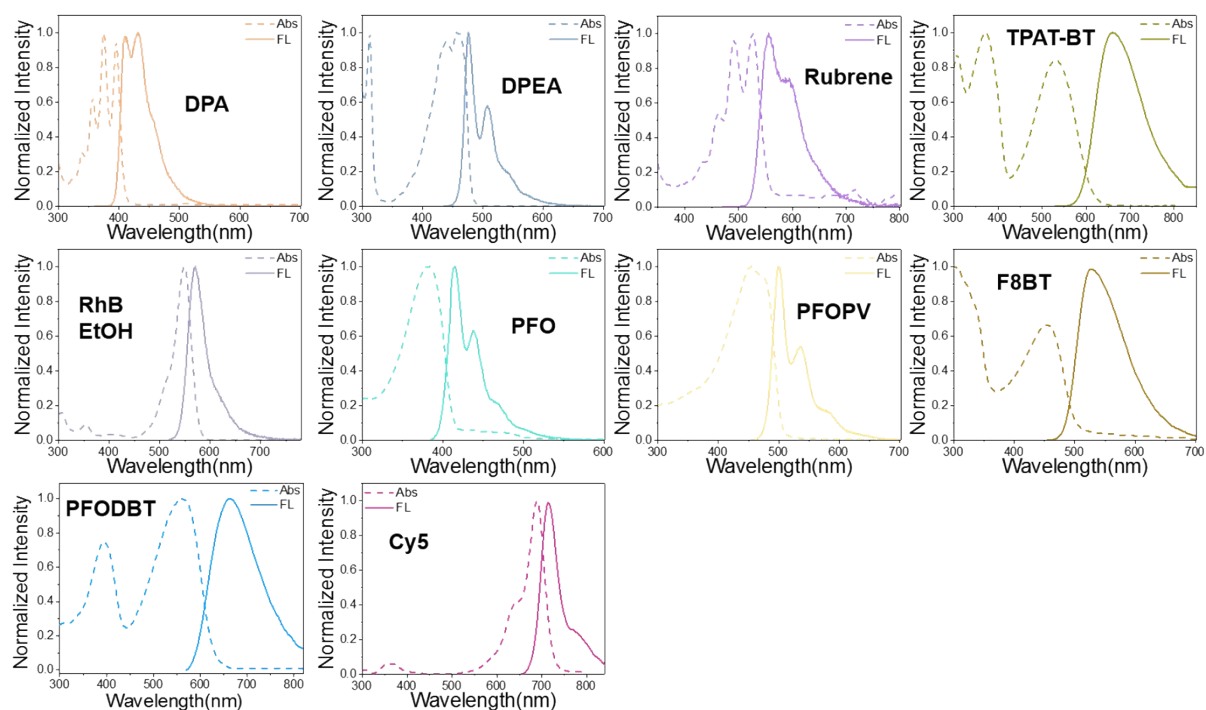

**Figure S2.** Absorption and emission spectra (in organic solvent, the spectra without indicating solvent were measured in toluene) of the reported emitters for constructing a water-dispersible POCL system.

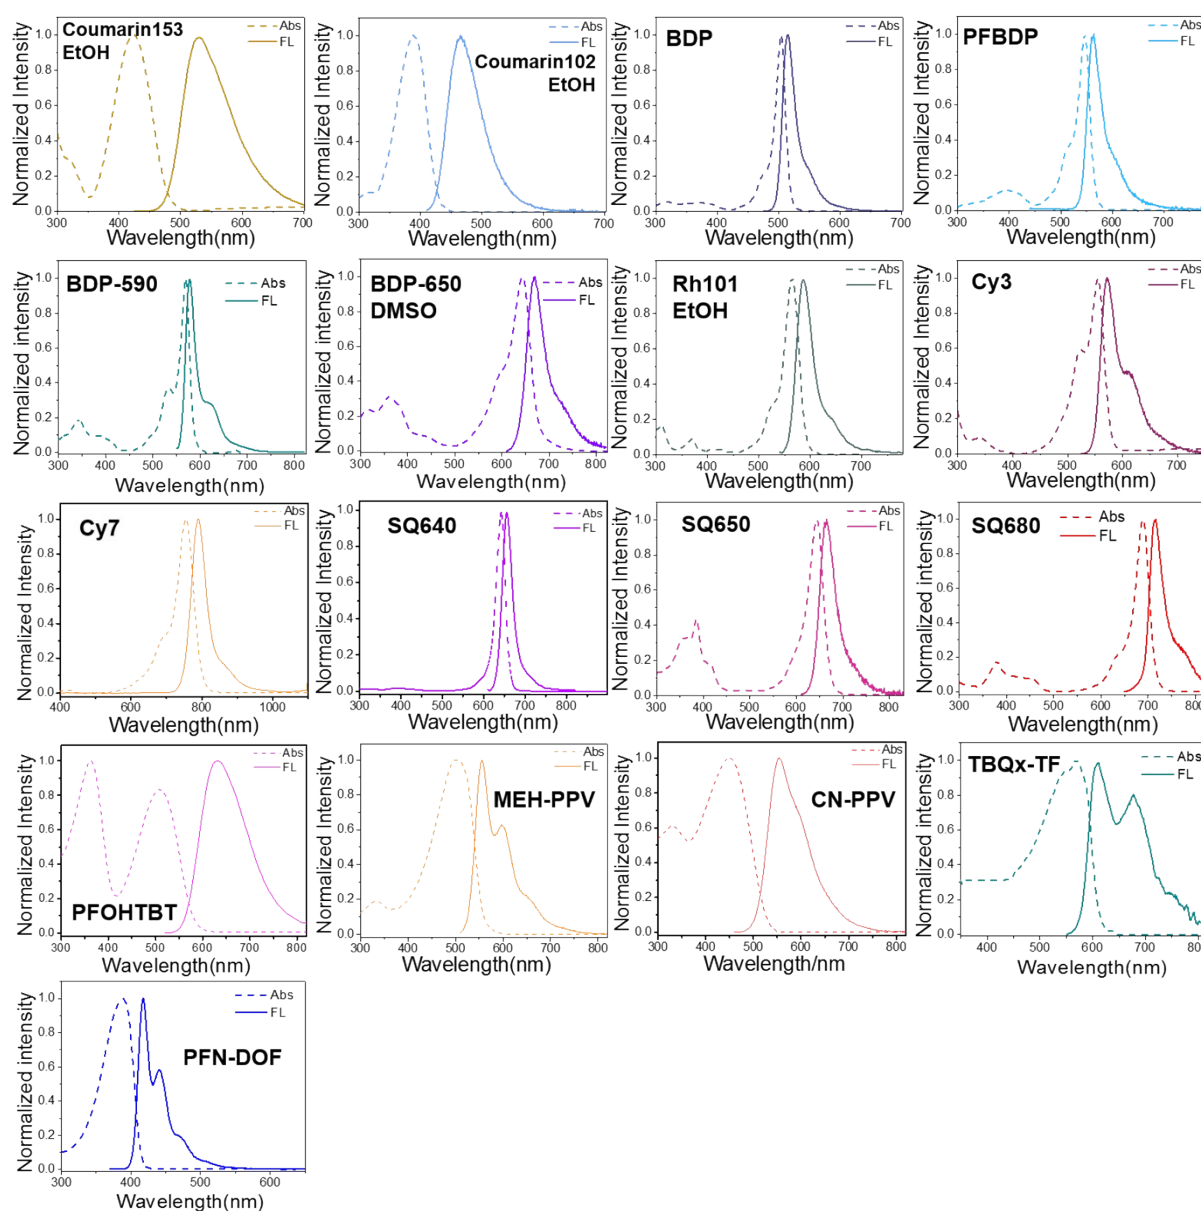

**Figure S3.** Absorption and emission spectra of the designed traditional organic dyes and conjugated polymers for constructing a water-dispersible POCL system in this work. The fluorophores are generally dissolved in toluene for optical determination. The spectra of several fluorophores determined in other organic solvents were labeled.

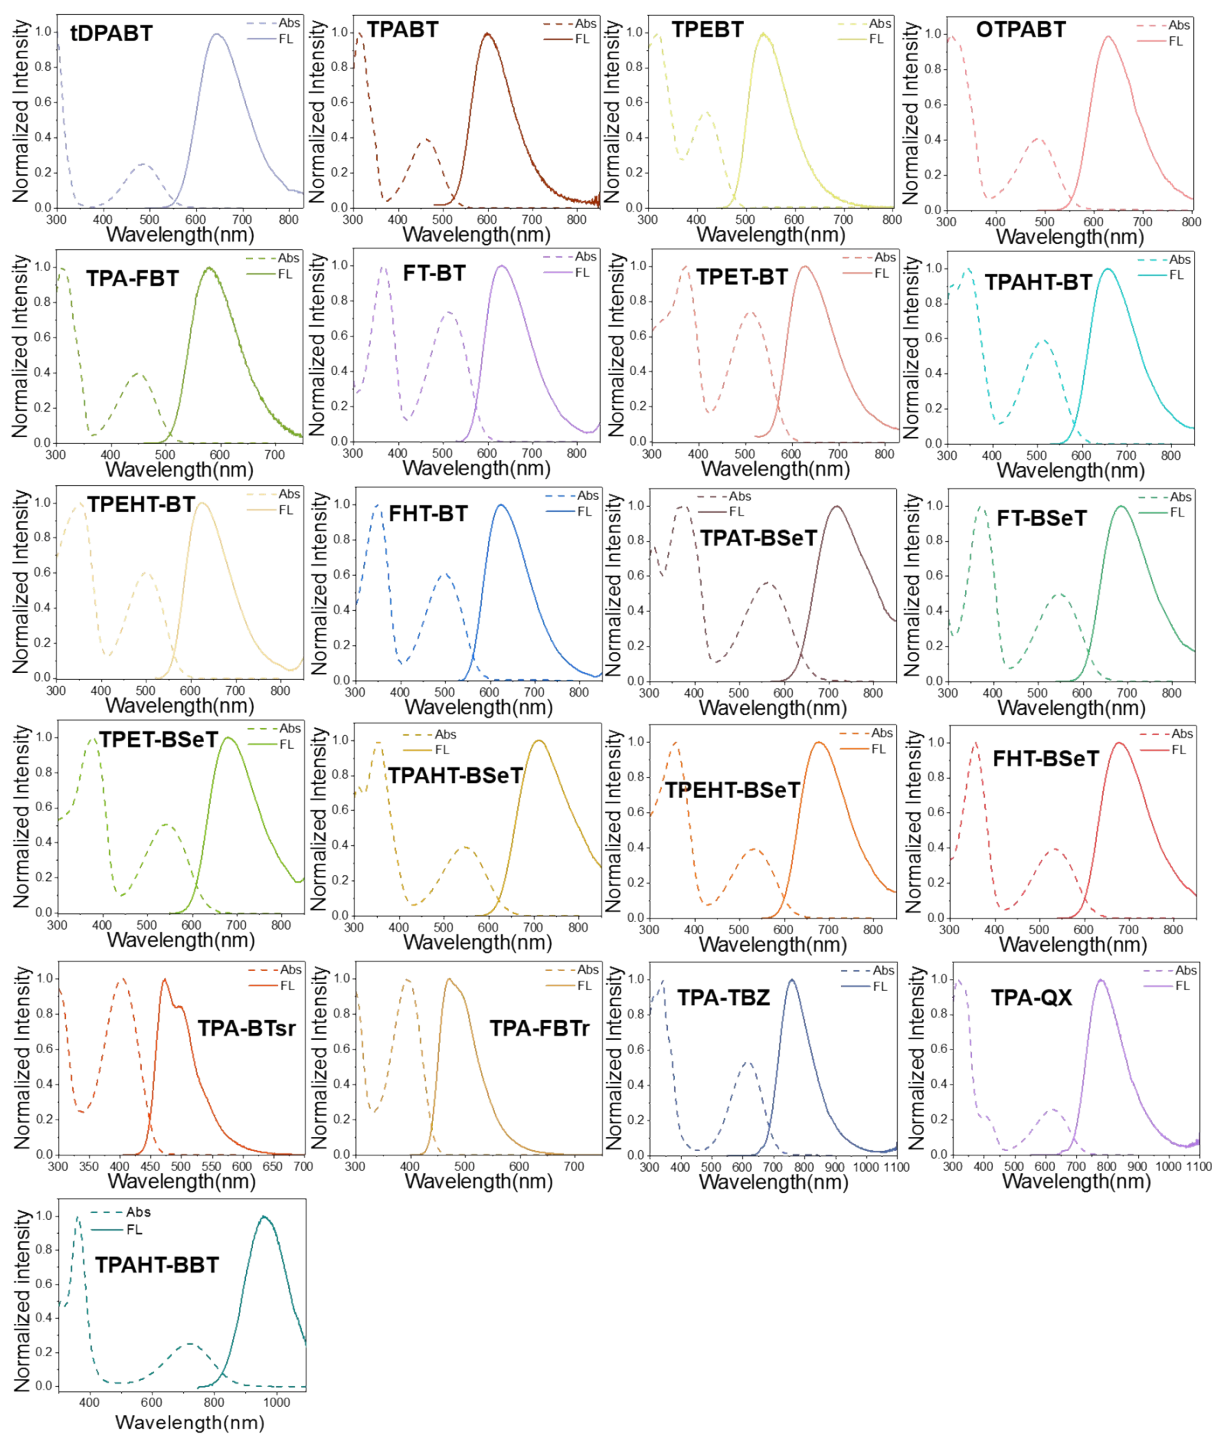

**Figure S4.** Absorption and emission spectra (in toluene) of the designed D-A-D type fluorophores for constructing a water-dispersible POCL system in this work.

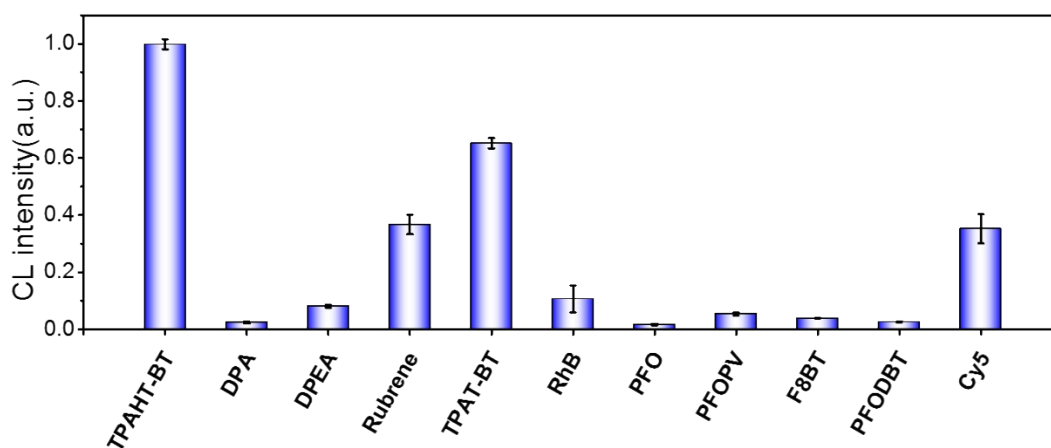

**Figure S5.** Comparison of the chemiluminescence intensity of POCL nanoparticles, which use TPAHT-BT and the reported fluorophores as the emitters in aqueous solution, respectively (TPAHT-BT is used as reference).

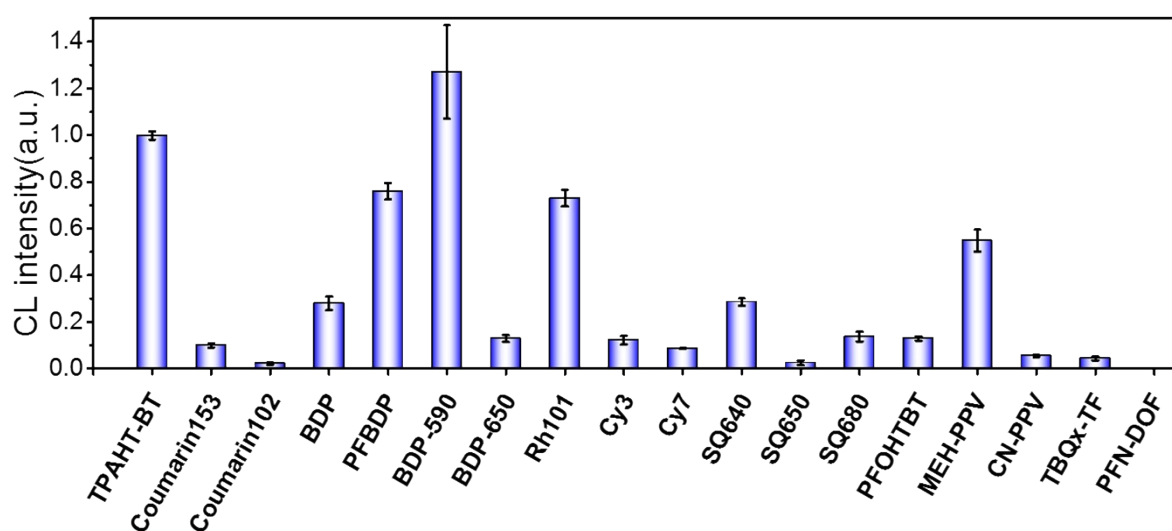

**Figure S6.** Comparison of the chemiluminescence intensity of POCL nanoparticles that use TPAHT-BT and other traditional fluorophores as the emitters in aqueous solution, respectively.

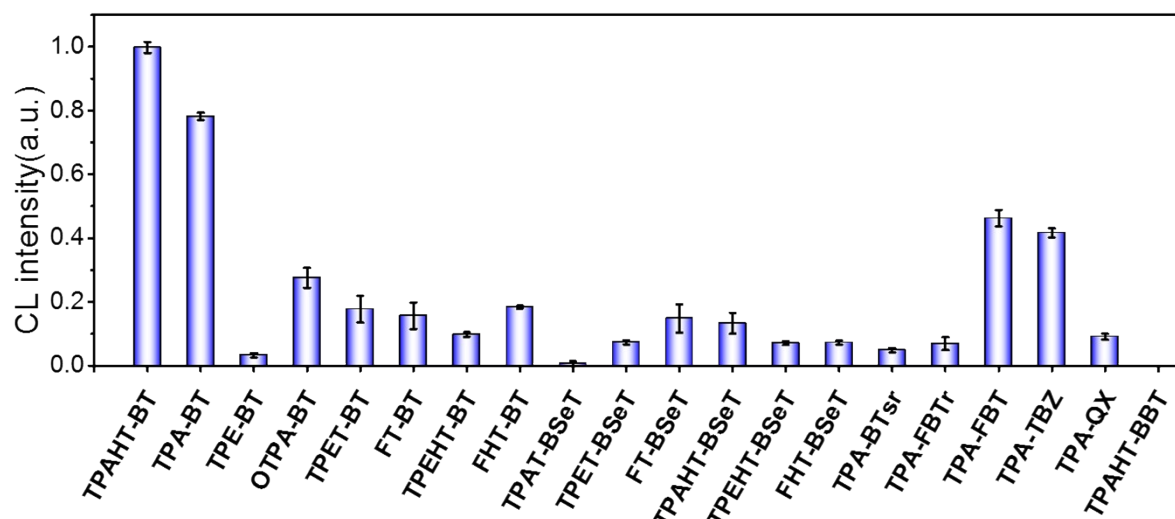

**Figure S7.** Comparison of the chemiluminescence intensity of POCL nanoparticles that use TPAHT-BT and other D-A-D-type fluorophores as the emitters in aqueous solution, respectively.

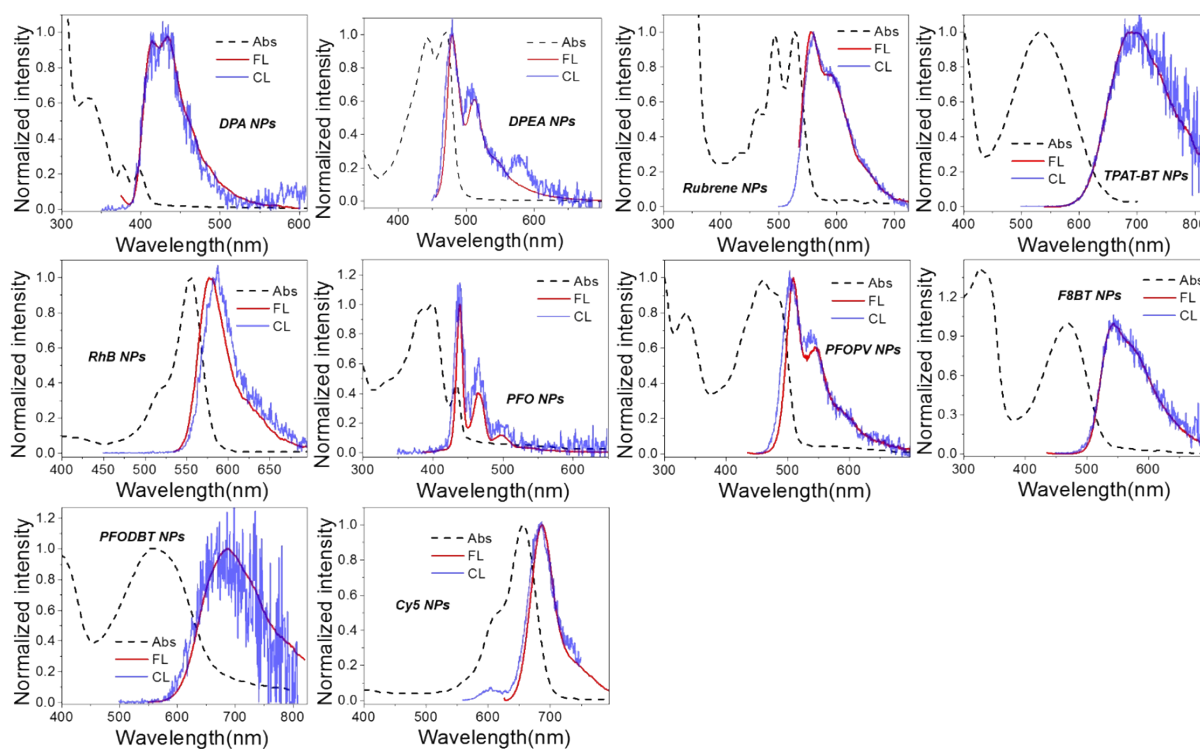

**Figure S8.** Normalized absorption, emission, and chemiluminescence spectra of the water-dispersible POCL system (nanoparticles, NPs), which uses different reported fluorophores as the emitters, respectively.



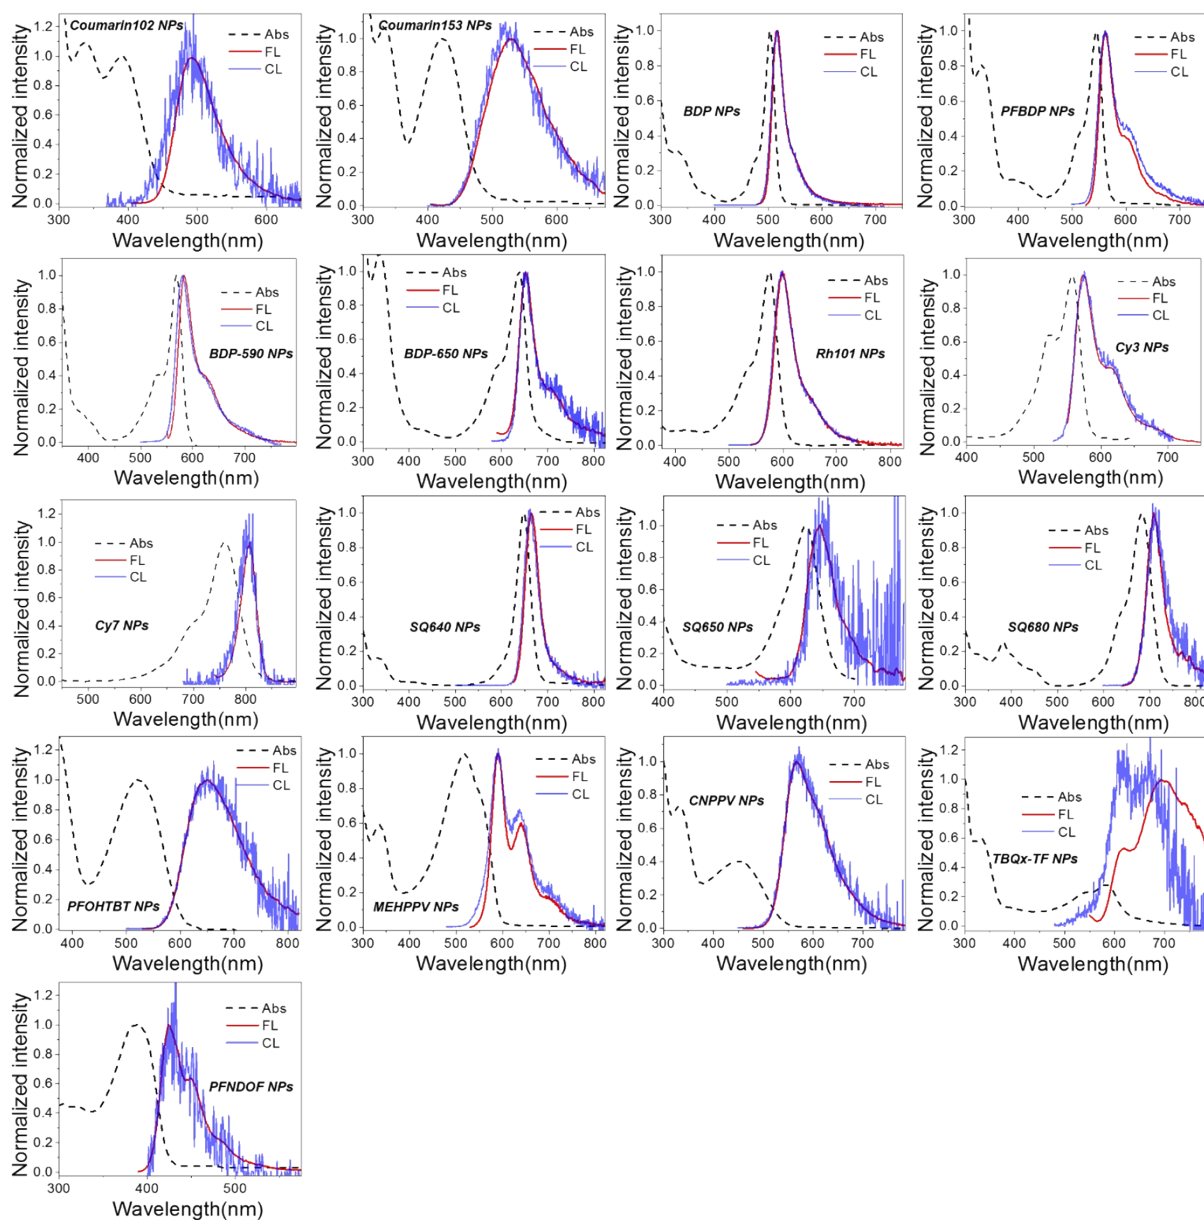

**Figure S9.** Normalized absorption, emission, and chemiluminescence spectra of the water-dispersible POCL system (nanoparticles, NPs), which uses different traditional fluorophores (including coumarin, BODIPY, cyanine, squaraine, and fluorescent conjugated polymers) as the emitters, respectively.

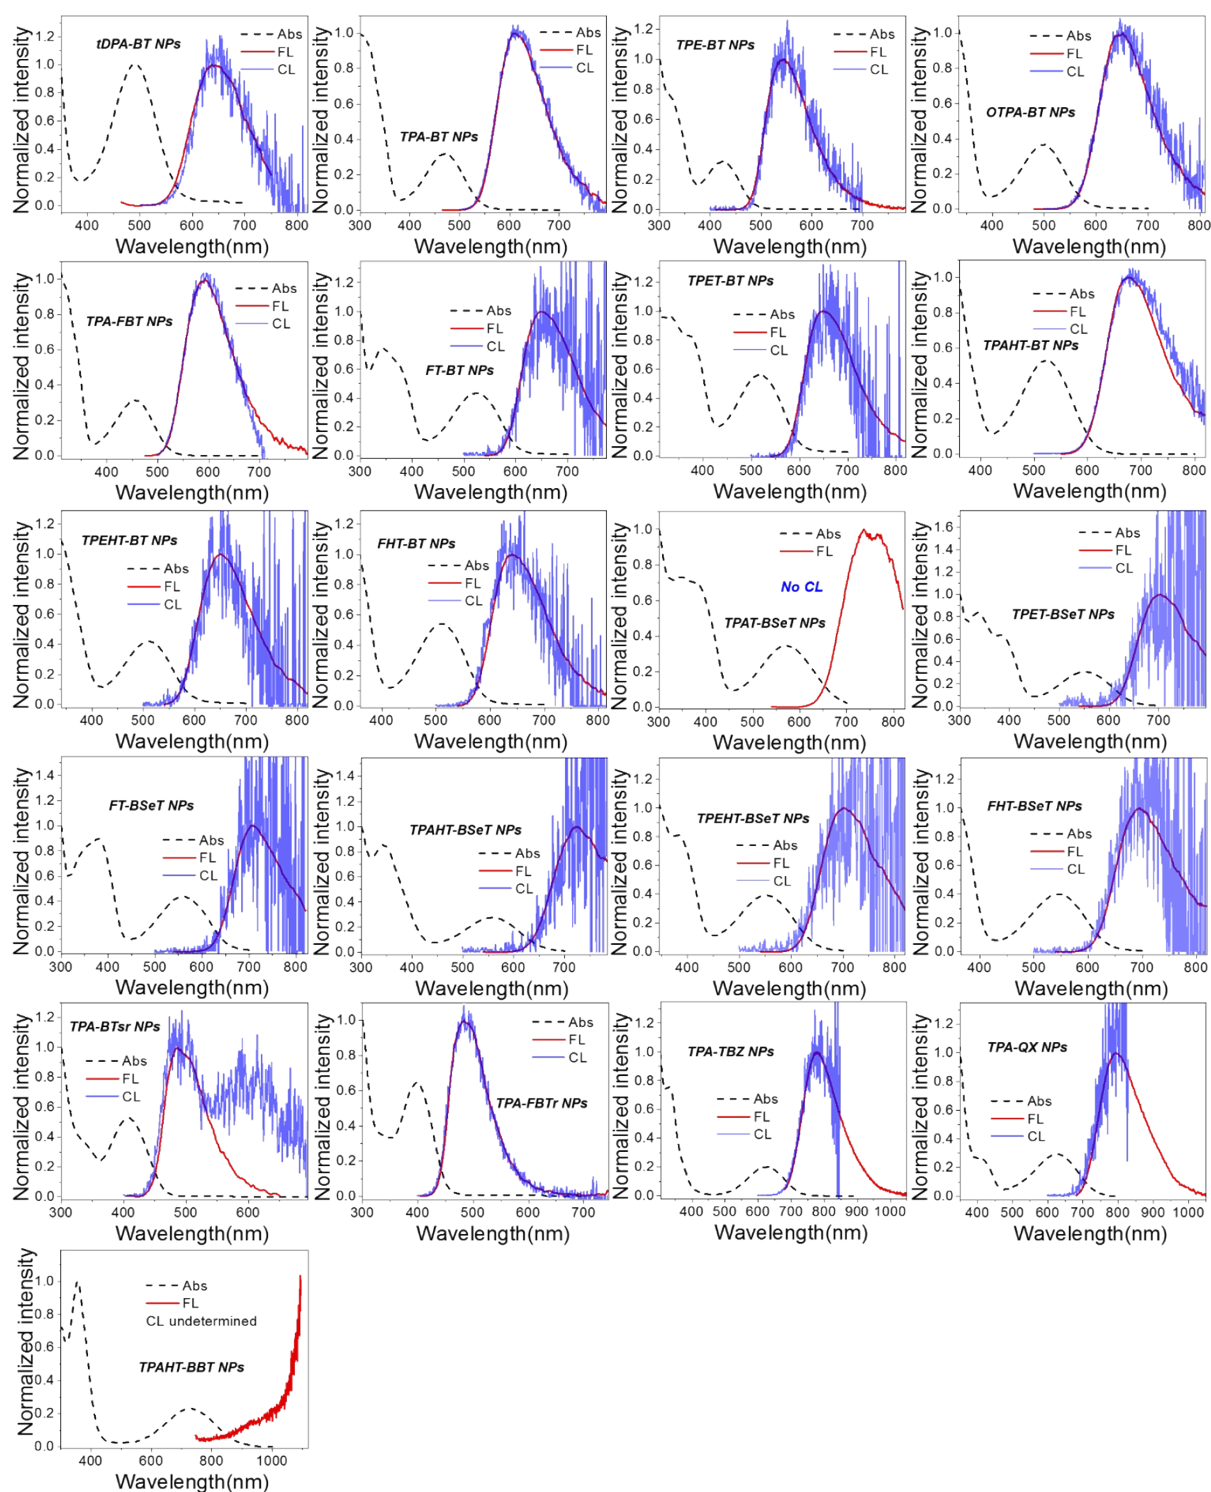

**Figure S10.** Normalized absorption, emission, and chemiluminescence spectra of the water-dispersible POCL system (nanoparticles, NPs), which uses D-A-D-type fluorophores as the emitters, respectively.

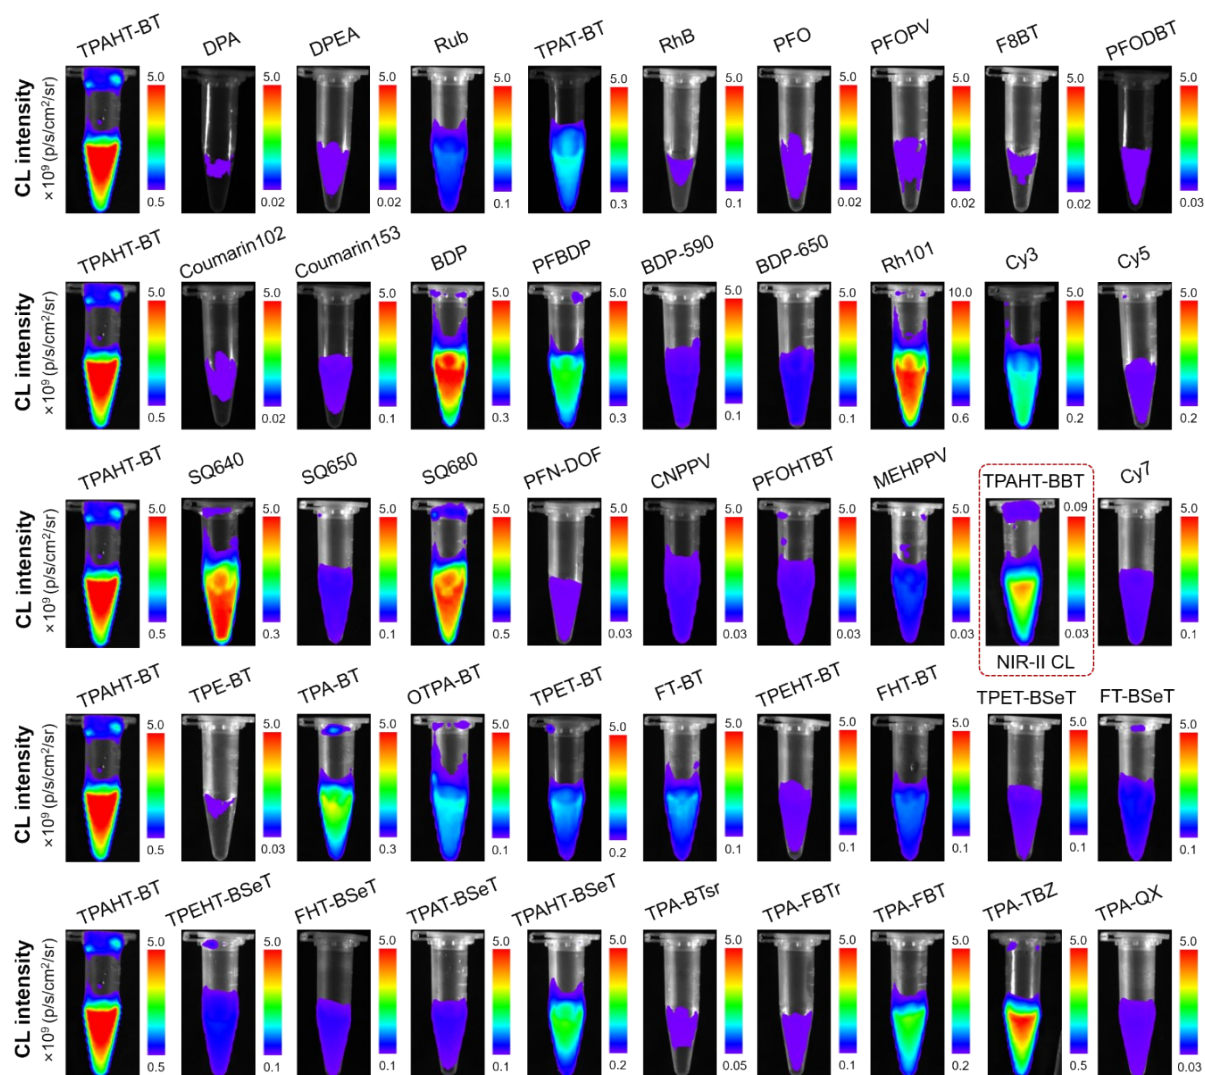

**Figure S11.** Comparison of the CL of the POCL NPs separately composed of different fluorophores. The chemiluminescence images were collected (at 3 min post the mixing of POCL NPs and  $\text{H}_2\text{O}_2$ ) by a highly sensitive chemiluminescence imaging system (Biolight biotechnology Co., Ltd., Aniview 100) at identical conditions ( $\text{H}_2\text{O}_2$ : 50 mM, POCL NPs: 0.1 mg/mL, 37 °C).

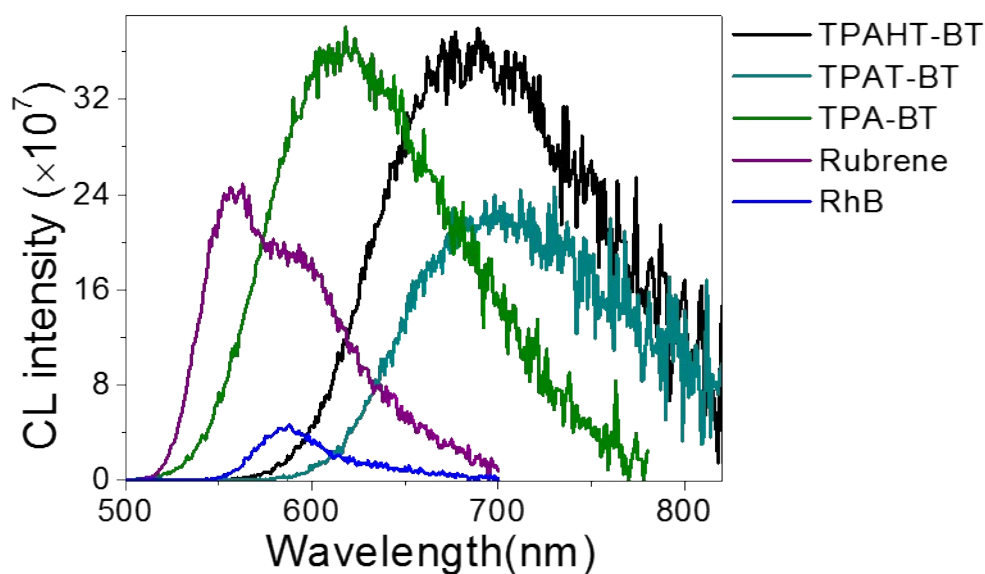

**Figure S12.** Comparison of the CL of the POCL NPs separately composed by TPAHT-BT, TPAT-BT, and TPA-BT, and the reported fluorophores (Rubrene and Rhodamine B)

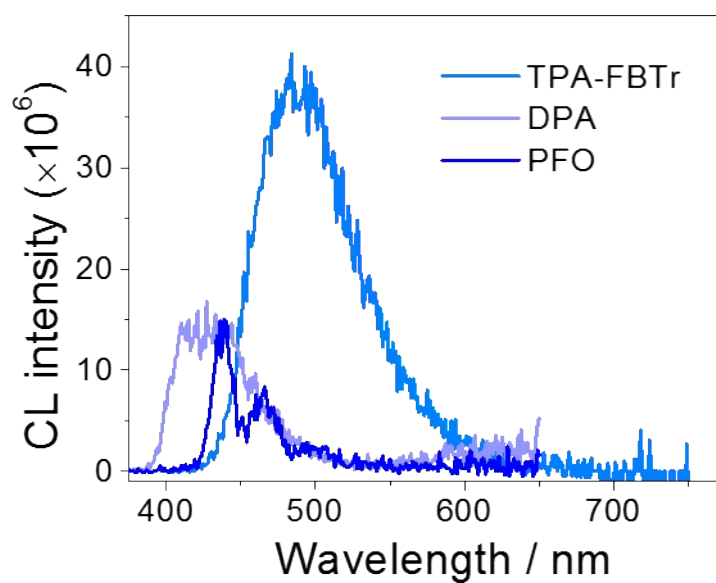

**Figure S13.** Comparison of the CL of the POCL NPs composed by TPA-FBTr, and the reported blue POCL emitters (PFO and DPA)



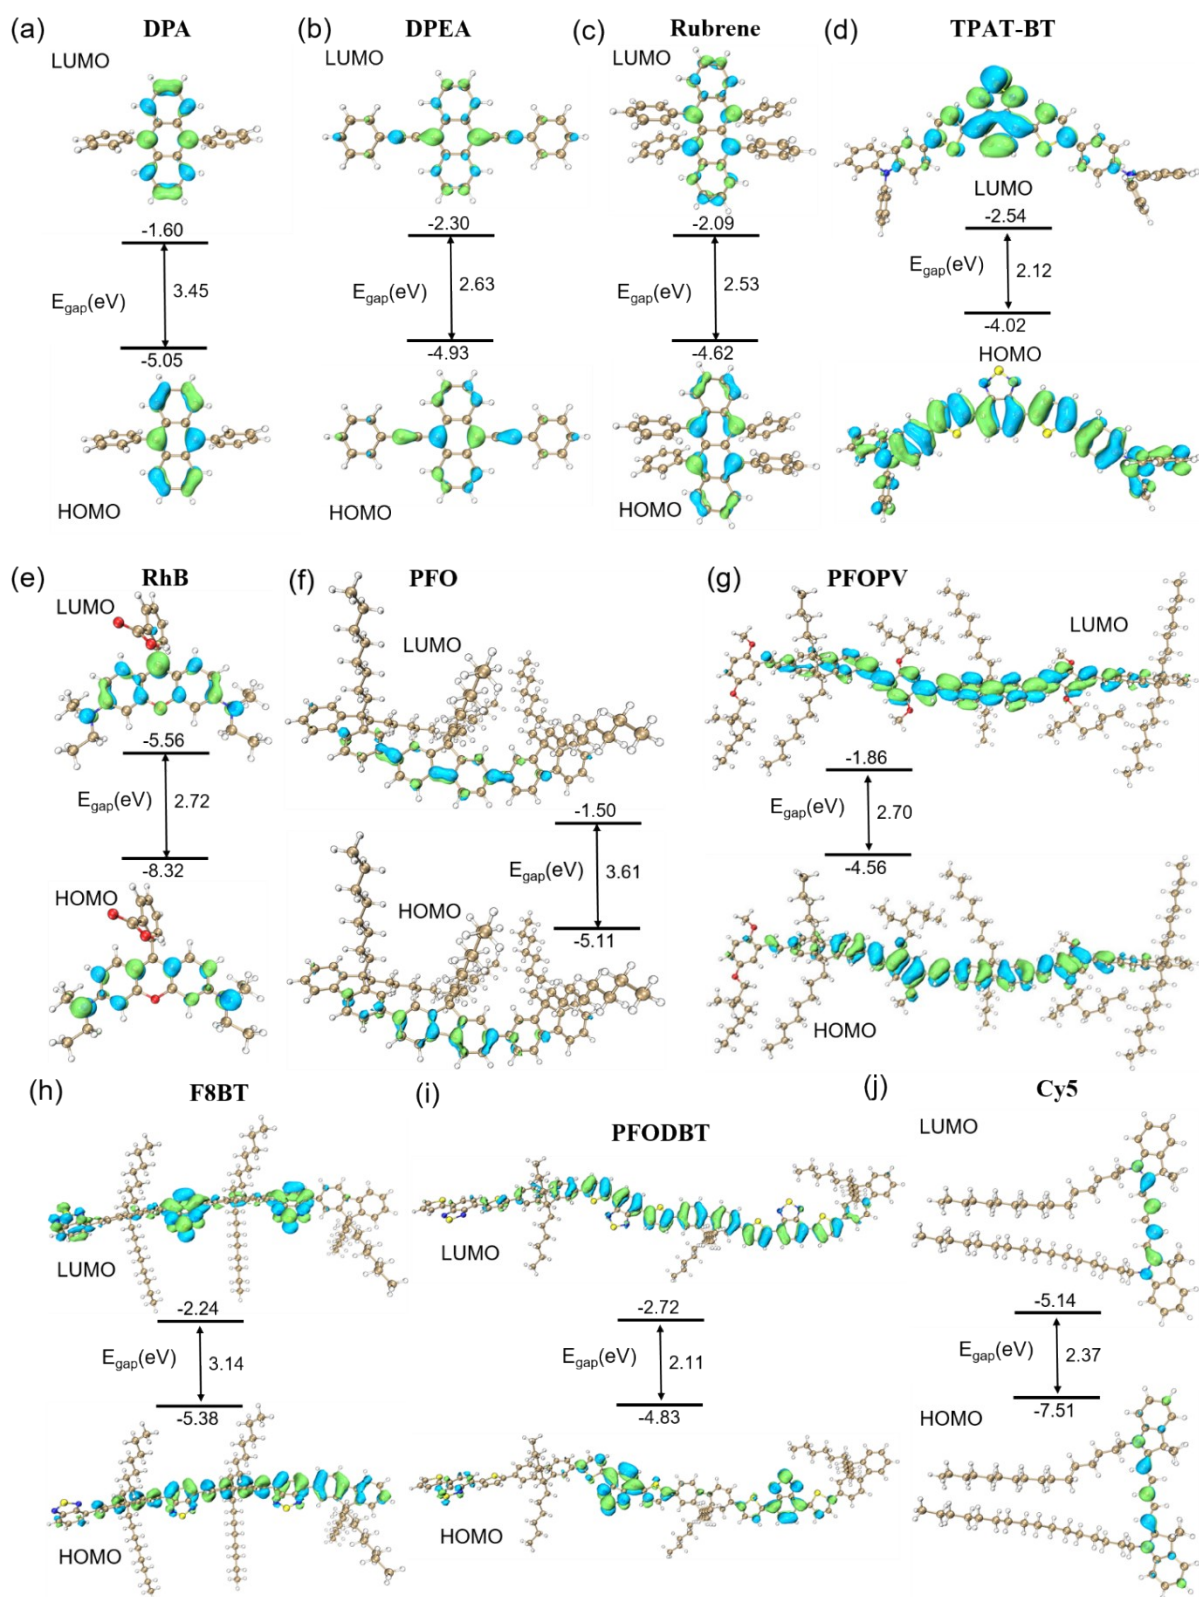

**Figure S14.** Calculated orbital distribution of the reported fluorophores.

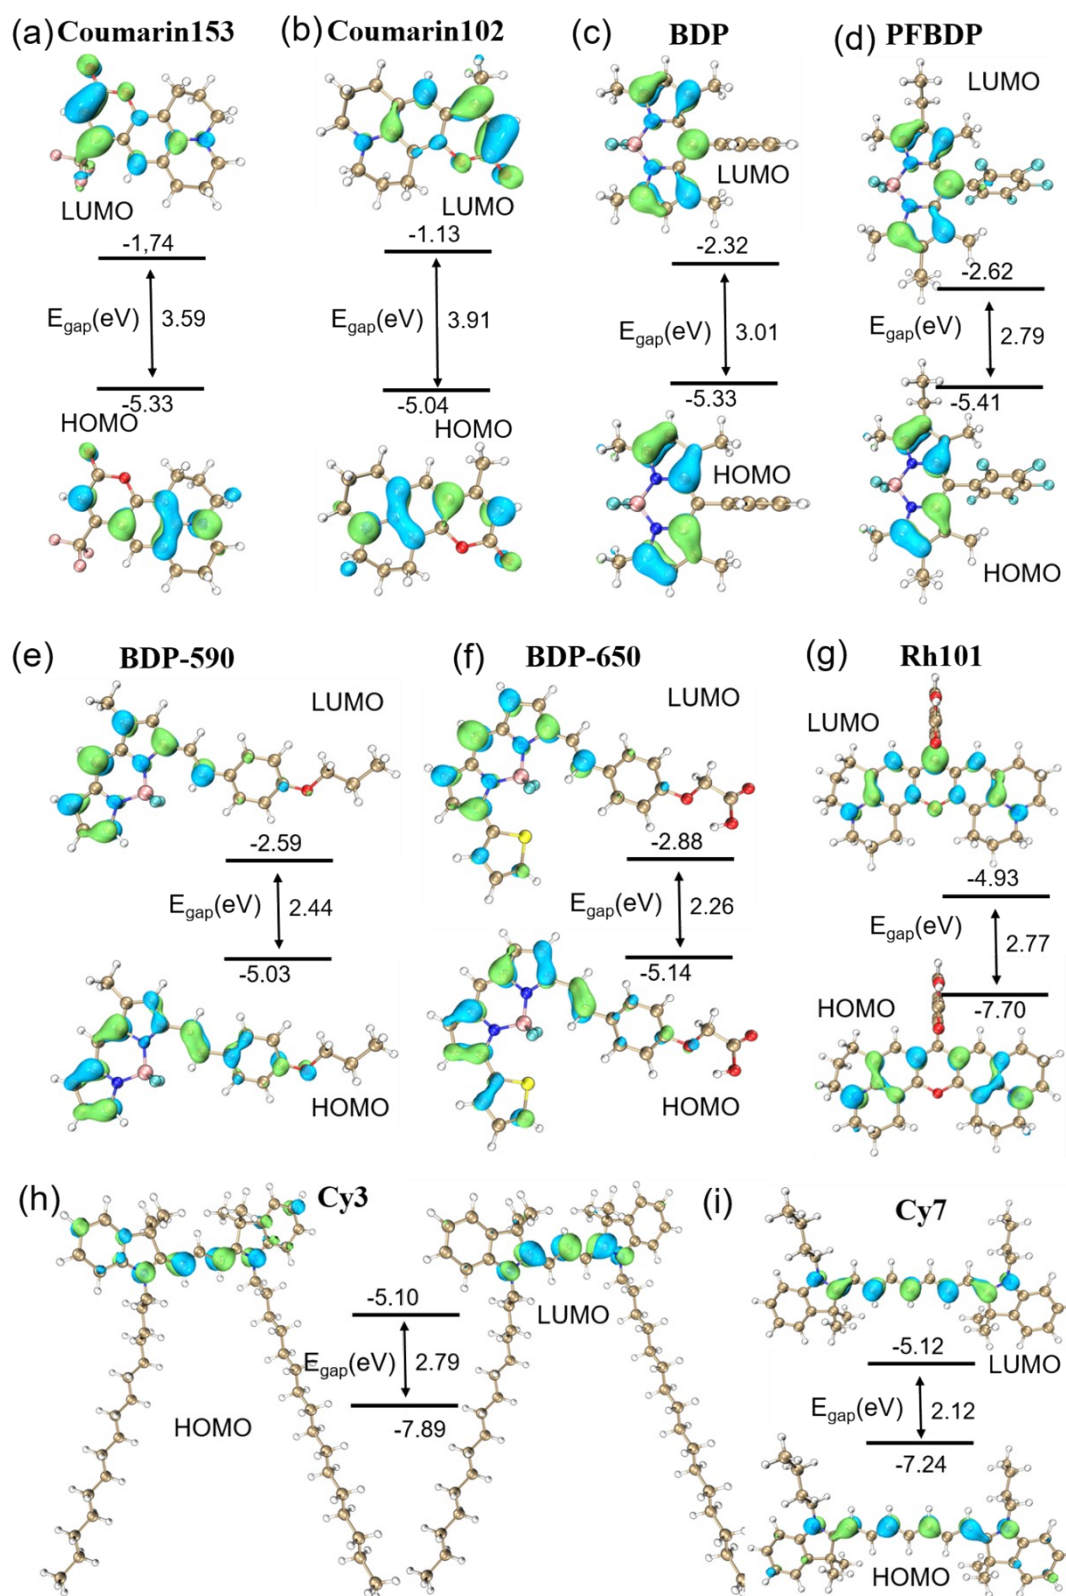

**Figure S15.** Calculated orbital distribution of traditional fluorophores, including a) coumarin 153, b) coumarin 102, c) BDP, d) PFBBDP, e) BDP-590, f) BDP-650, g) Rh101, h) Cy3 and i) Cy7.

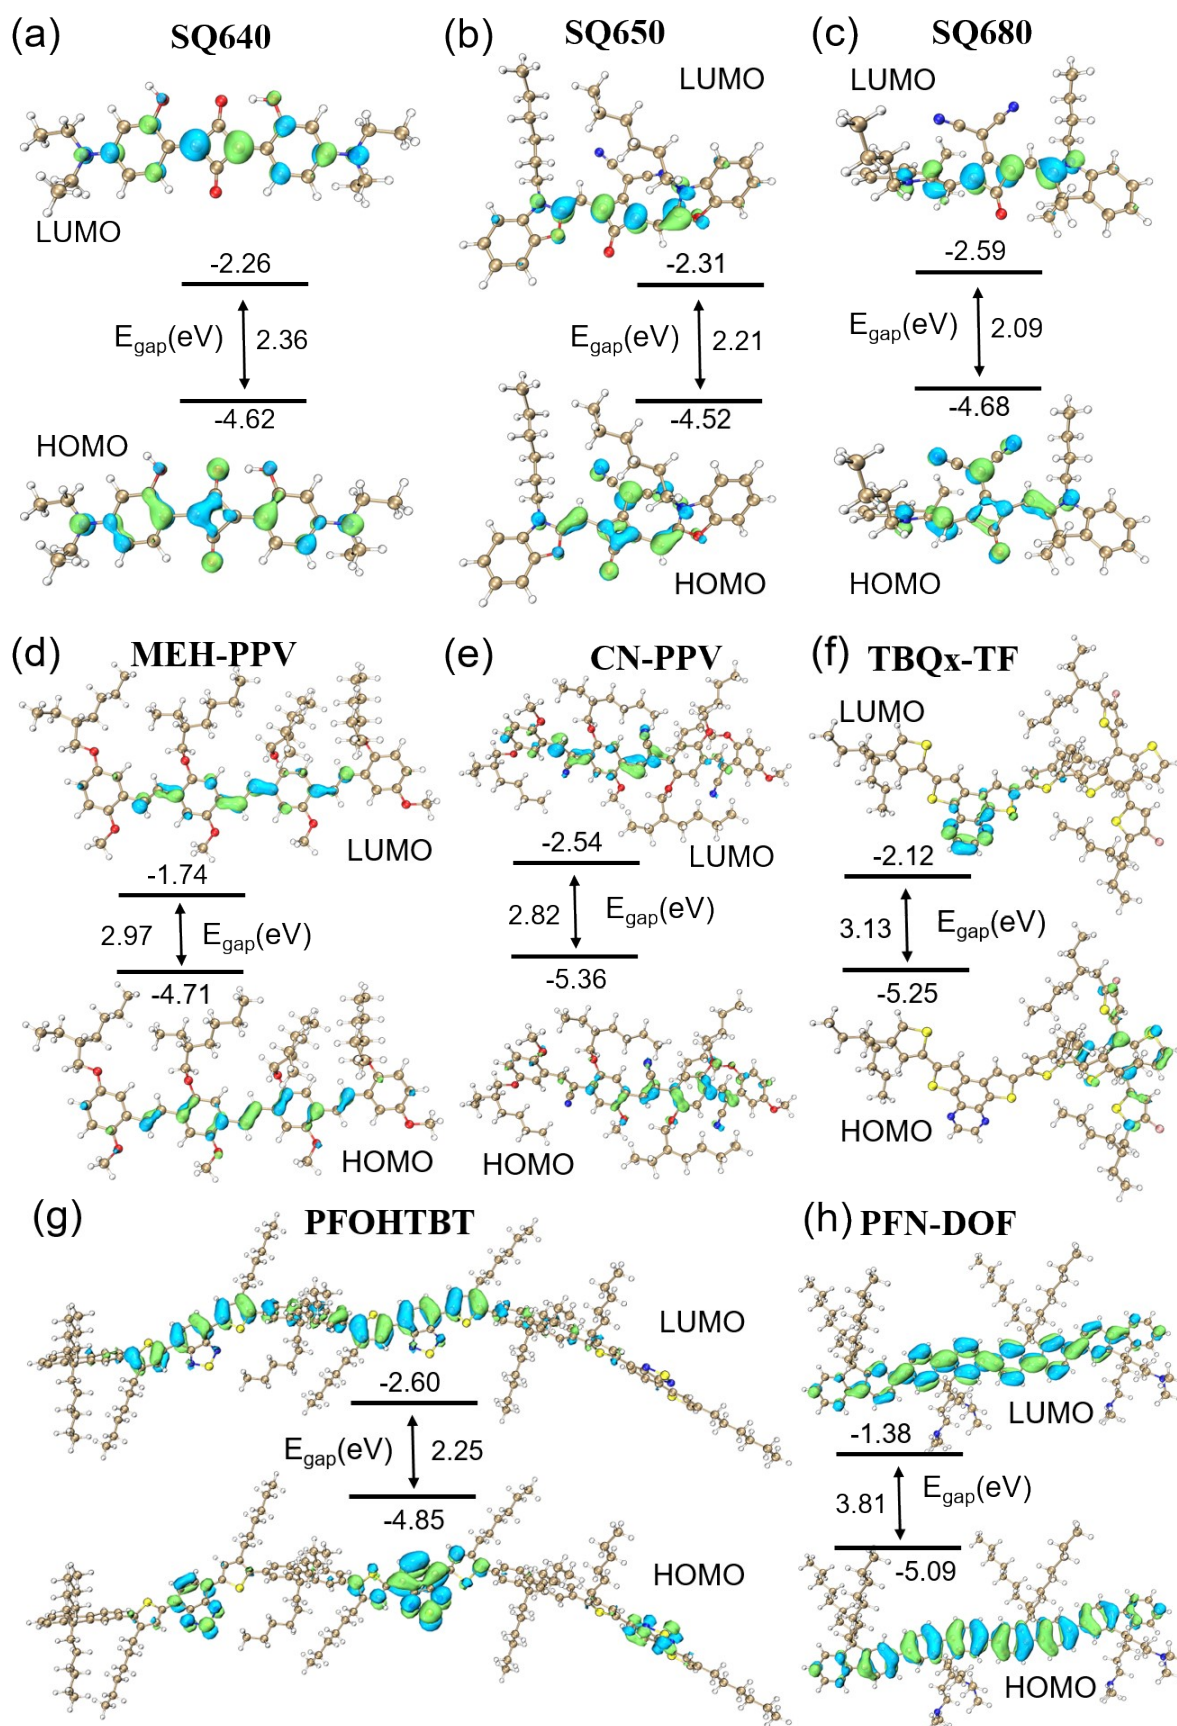

**Figure S16.** Calculated orbital distribution of traditional fluorophores, including a) SQ640, b) SQ650, c) SQ680, d) MEHPPV, e) CN-PPV, f) TBQx-TF, g) PFOHTBT, and h) PFN-DOF.



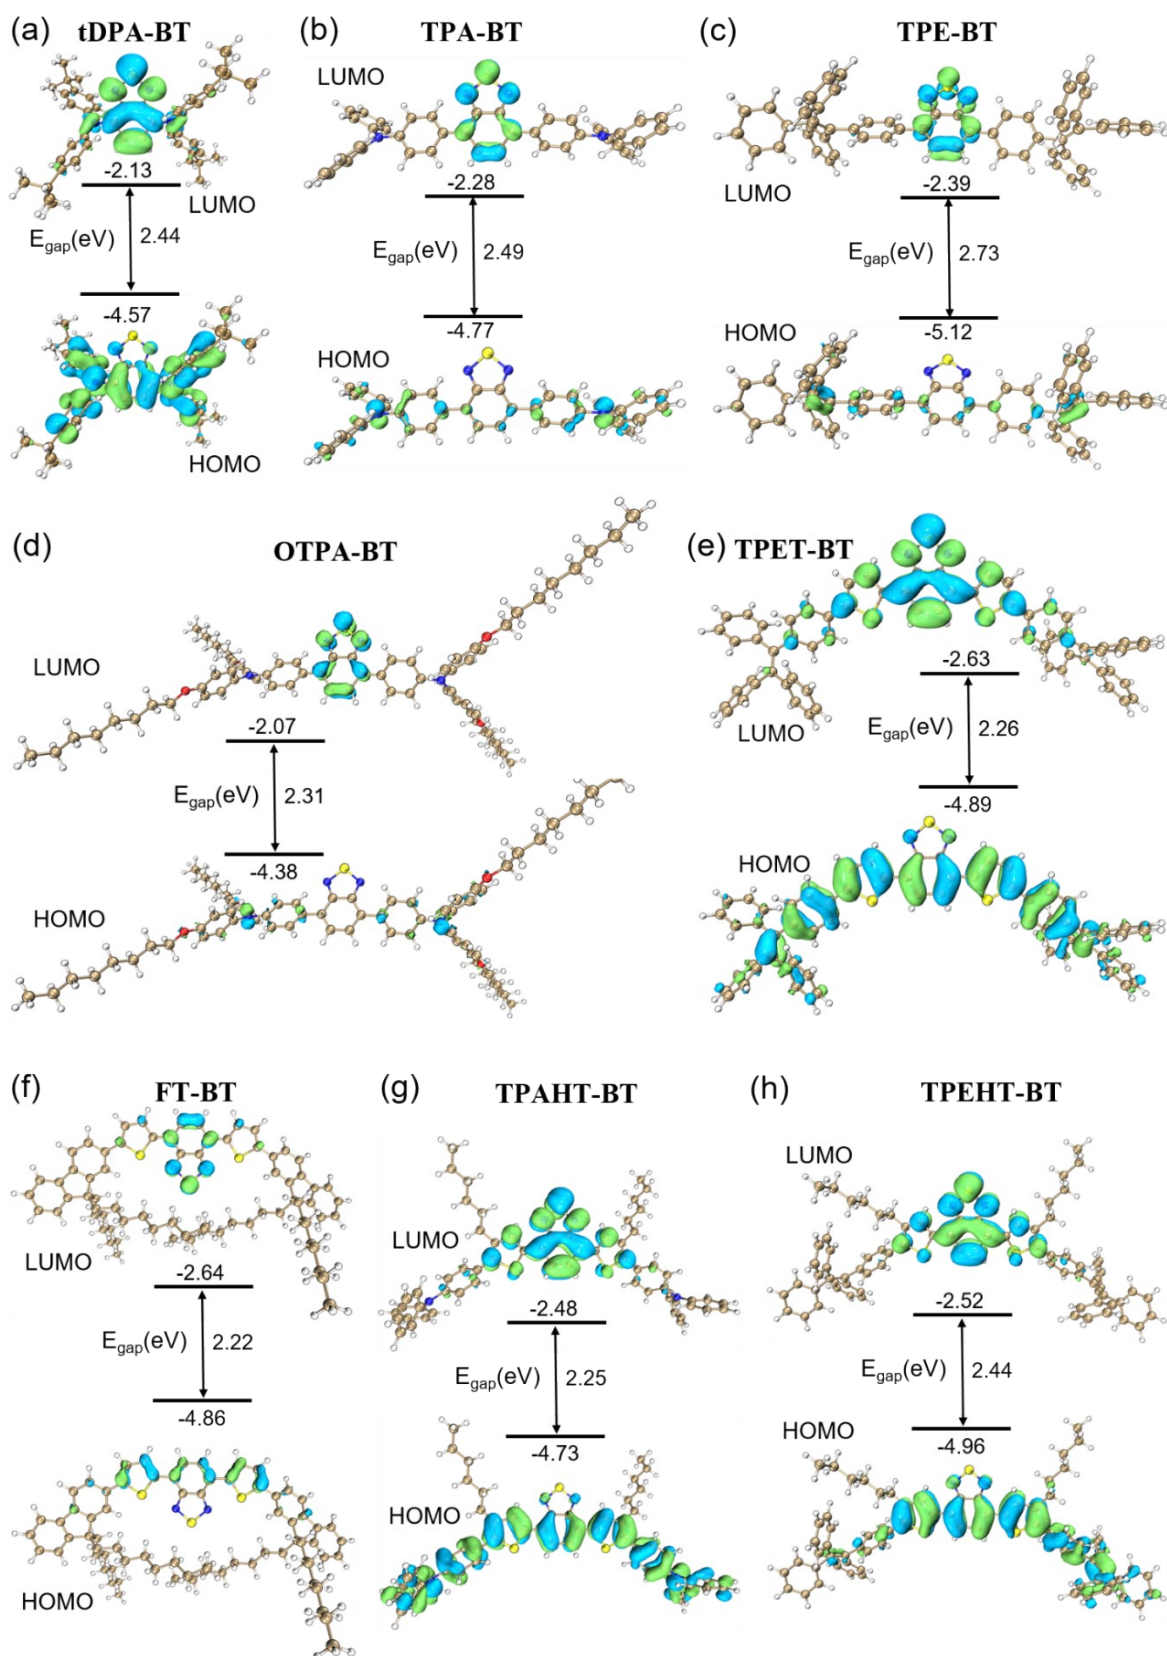

**Figure S17.** Calculated orbital distribution of the developed fluorophores, including a) tDPA-BT, b) TPA-BT, c) TPE-BT, d) OTPA-BT, e) TPET-BT, f) FT-BT, g) TPAHT-BT, and h) TPEHT-BT.



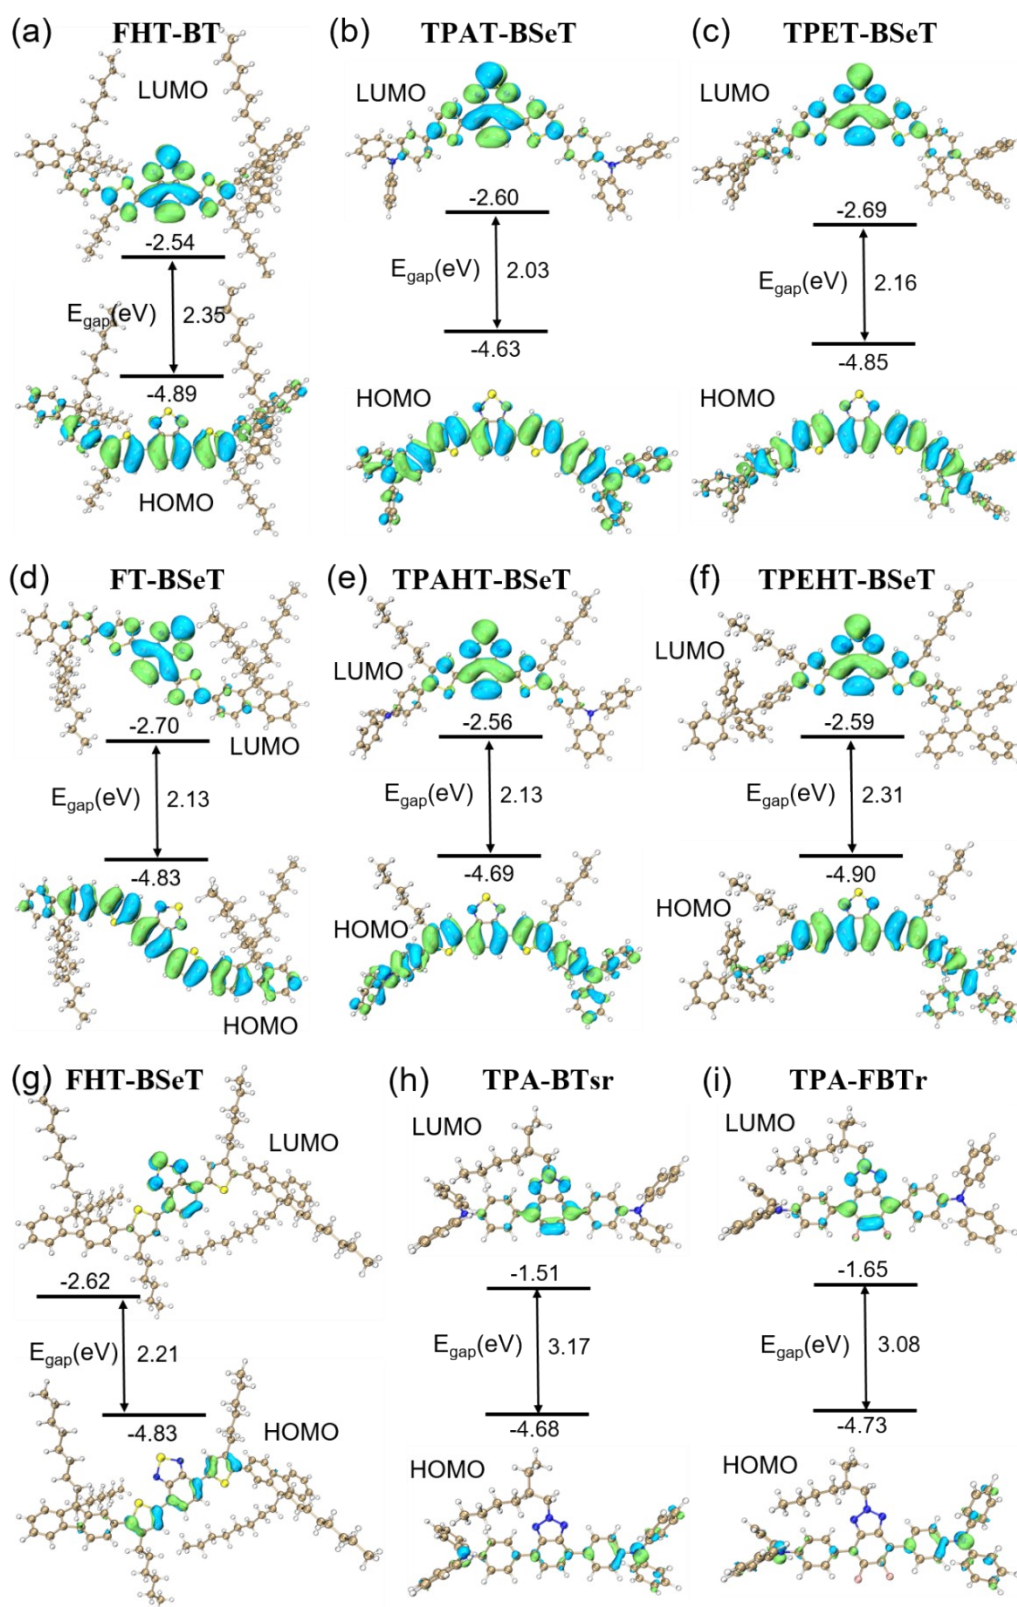

**Figure S18.** Calculated orbital distribution of traditional fluorophores including a) FHT-BT, b) TPAT-BSeT, c) TPET-BSeT, d) FT-BSeT, e) TPAHT-BSeT, f) TPEHT-BSeT, g) FHT-BSeT, h) TPA-BTsr and i) TPA-FBTr.

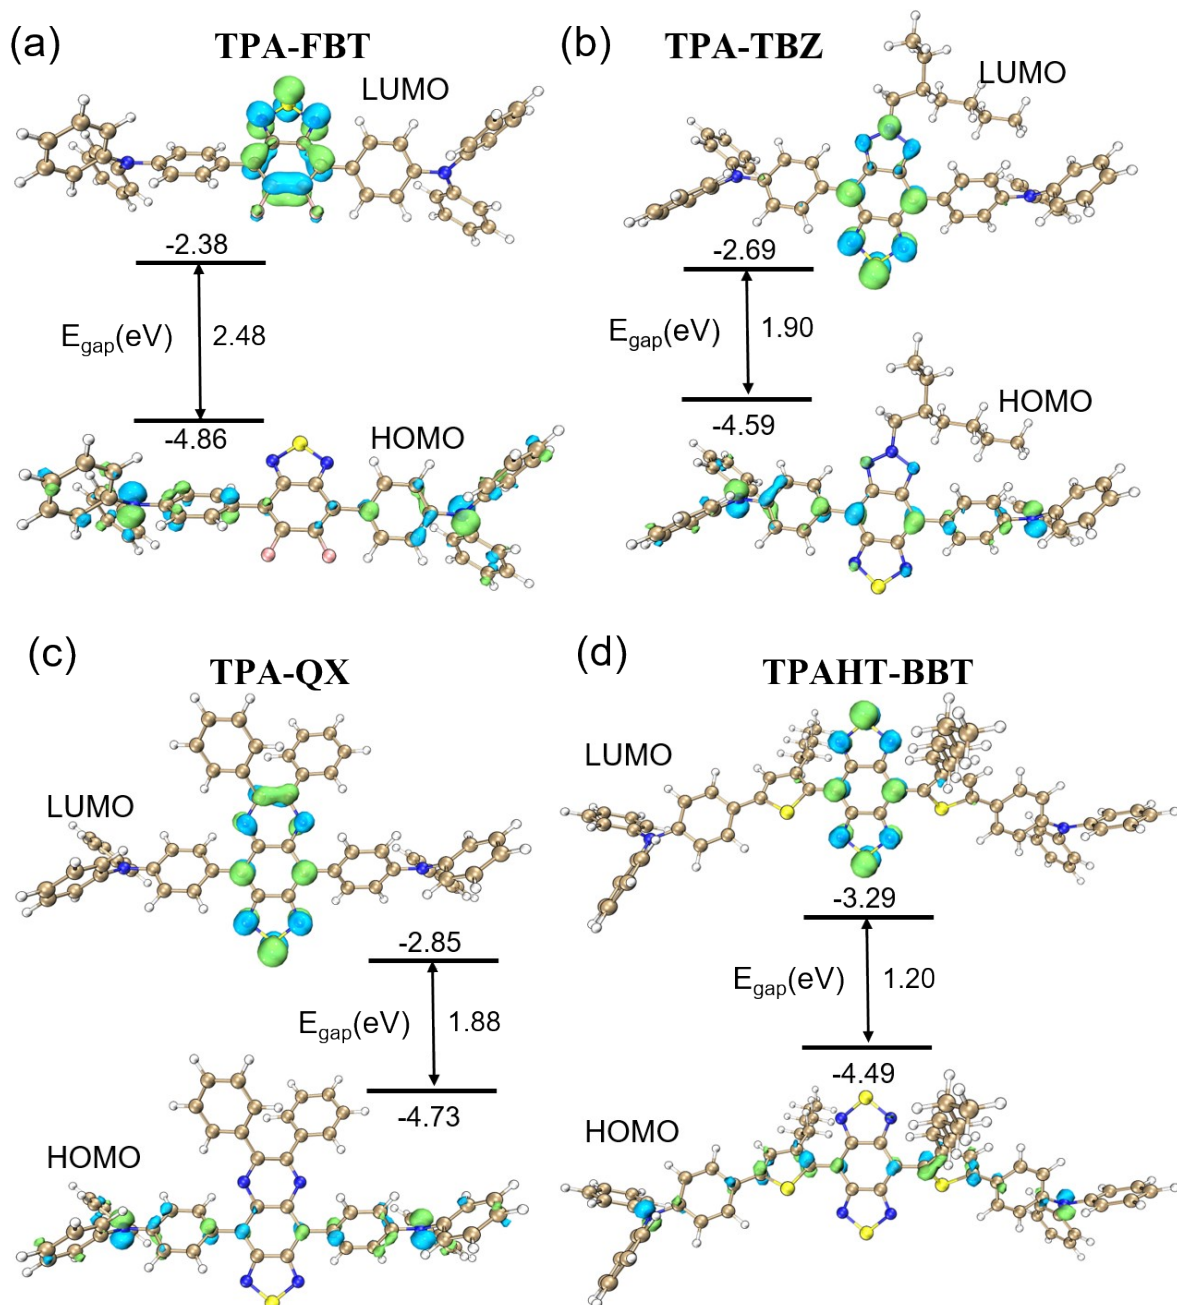

**Figure S19.** Calculated orbital distribution of traditional fluorophores, including a) TPA-FBT b) TPA-TBZ c) TPA-QX and d) TPAHT-BBT.

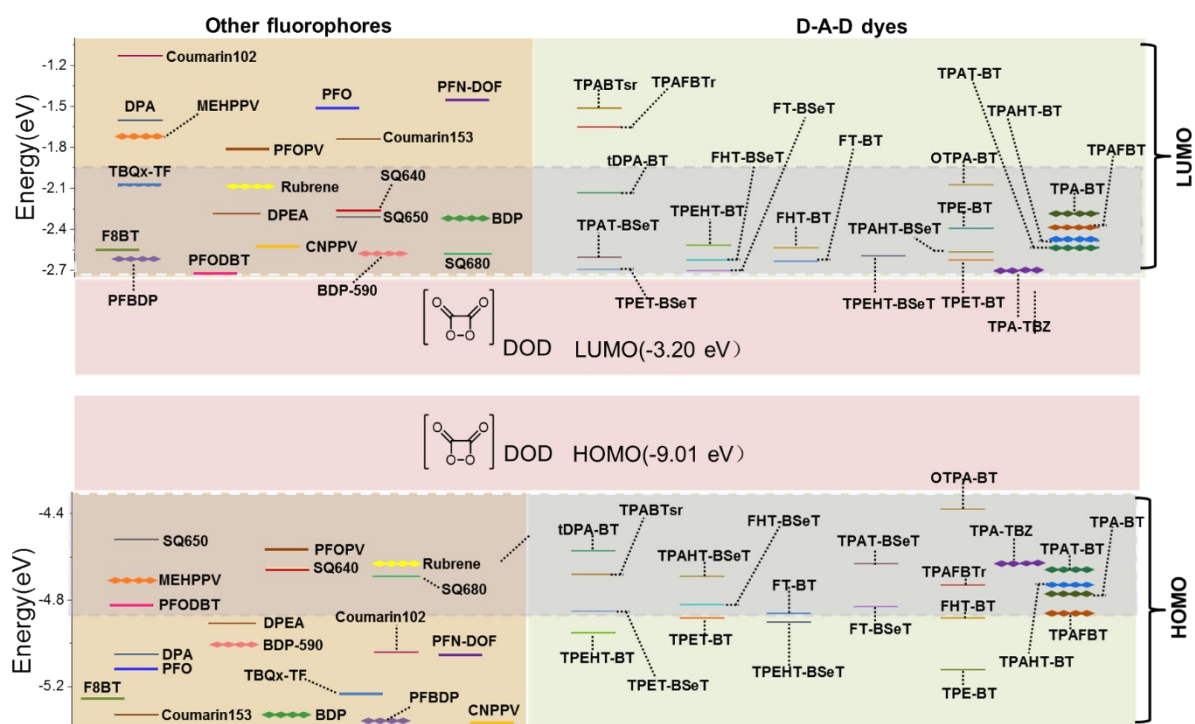

**Figure S20.** HOMO and LUMO energy levels of DOD and different lumophores (as the chemiluminescent emitter of CLNPs).

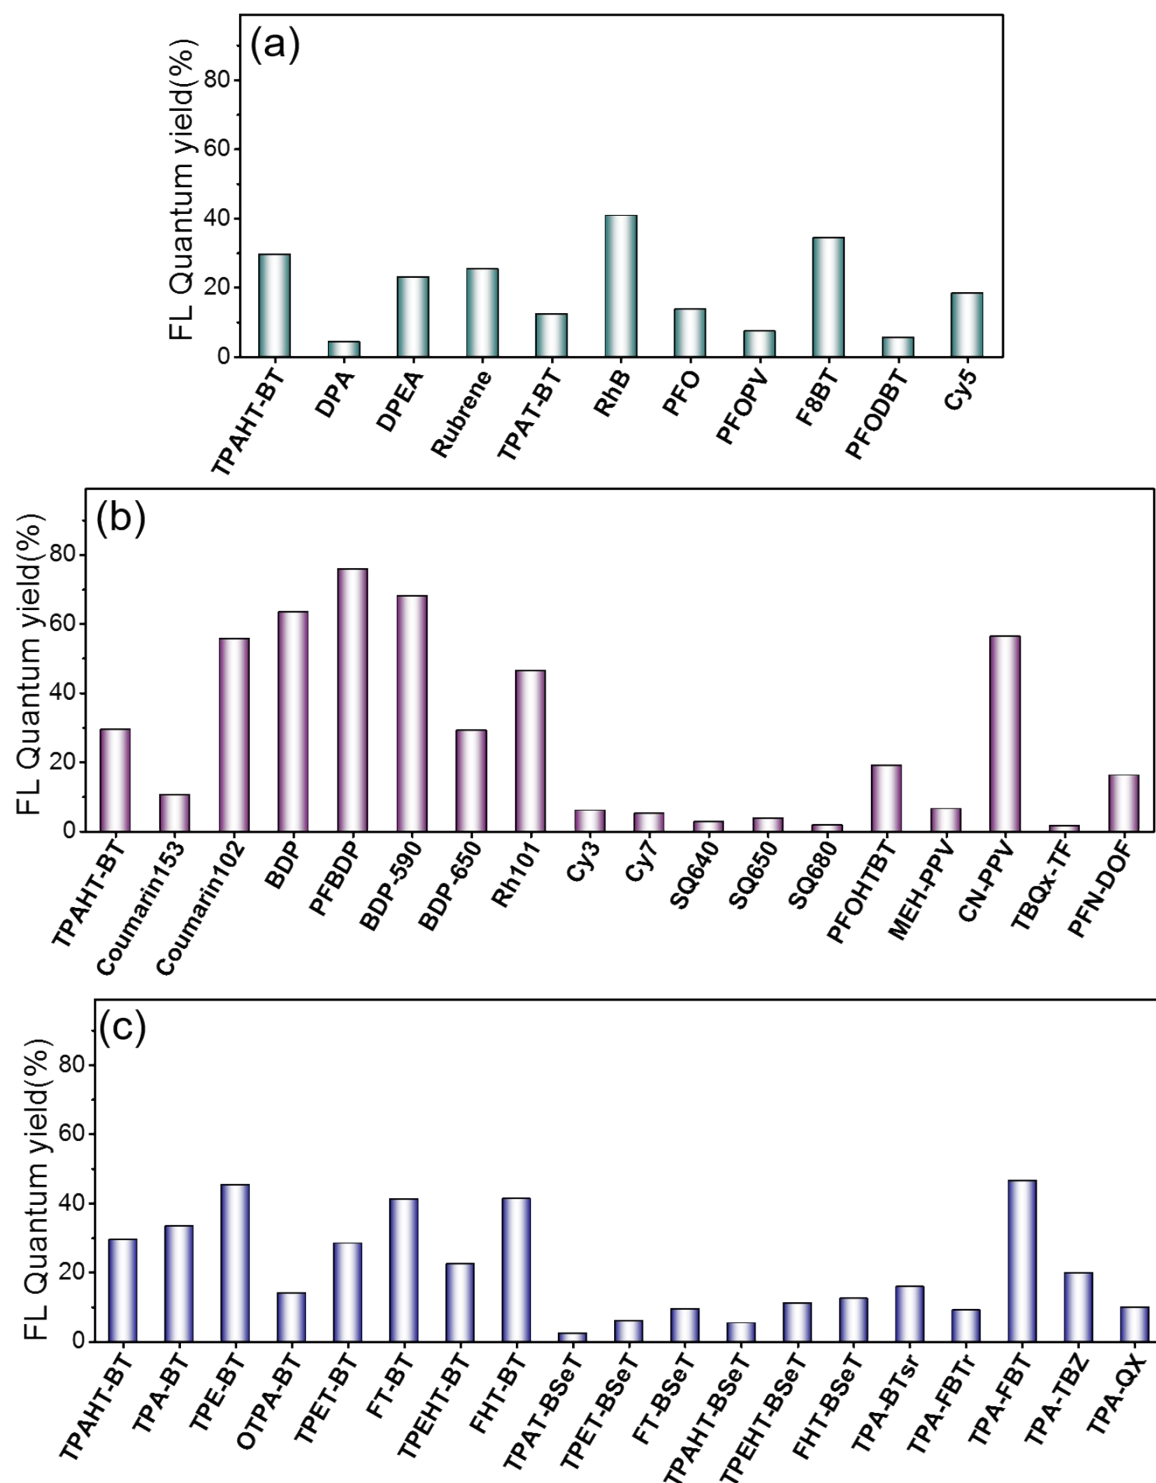

**Figure S21.** Fluorescence quantum yield of the POCL NPs composed of different kinds of fluorophores in aqueous solution. a) Reported fluorophores, b) traditional fluorophores, and c) the D-A-D type fluorophores developed in this work.

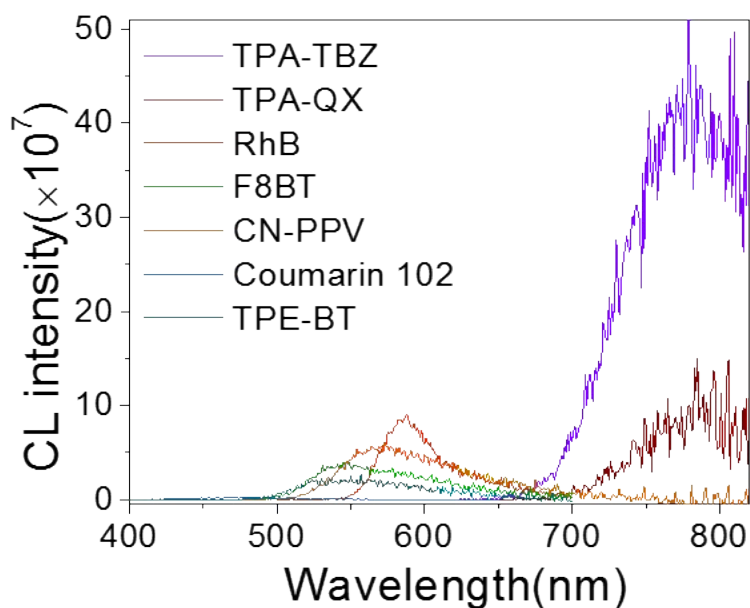

**Figure S22.** Comparison of the CL intensity of the POCL NPs, which were composed by using TPA-TPZ, TPA-QX, RhB, F8BT, CN-PPV, Coumarin 102, and TPE-BT as the emitter, respectively. The deep NIR emissive fluorophores (TPA-TPZ: QY~19.8% and TPA-QX: 9.9%) exhibited superior chemiluminescence in aqueous solution compared to various visible emissive fluorophores, including RhB (40.8%), TPE-BT (45.3%), coumarin102 (55.7%), FHT-BT (41.2%), CN-PPV (56.4%), and F8BT (34.3%), despite their relatively lower QY. This phenomenon can be attributed to the enhanced intramolecular charge-transfer (ICT) effect and the energy-gap law. It is noteworthy that the  $\Delta E_{\text{LUMO}}$  and  $\Delta E_{\text{HOMO}}$  values of these two dyes also fall within the optimal region, specifically the fourth quadrant. These results confirmed the universality of the proposed design principle for achieving a bright, water-dispersible POCL system, as demonstrated in this study. Furthermore, since the red-shifting emission of organic fluorophores is typically achieved by extending their conjugated scaffolds or enhancing the push-pull electron effect, it can be predicted that the energy levels of the organic POCL emitters with red-shifted emission will tend to fall within the optimal energy level region. Therefore, it is suggested that the bright deep-NIR-I/NIR-II POCL system could be achieved when the QY of the deep-NIR-I/NIR-II emissive fluorophores was significantly enhanced.



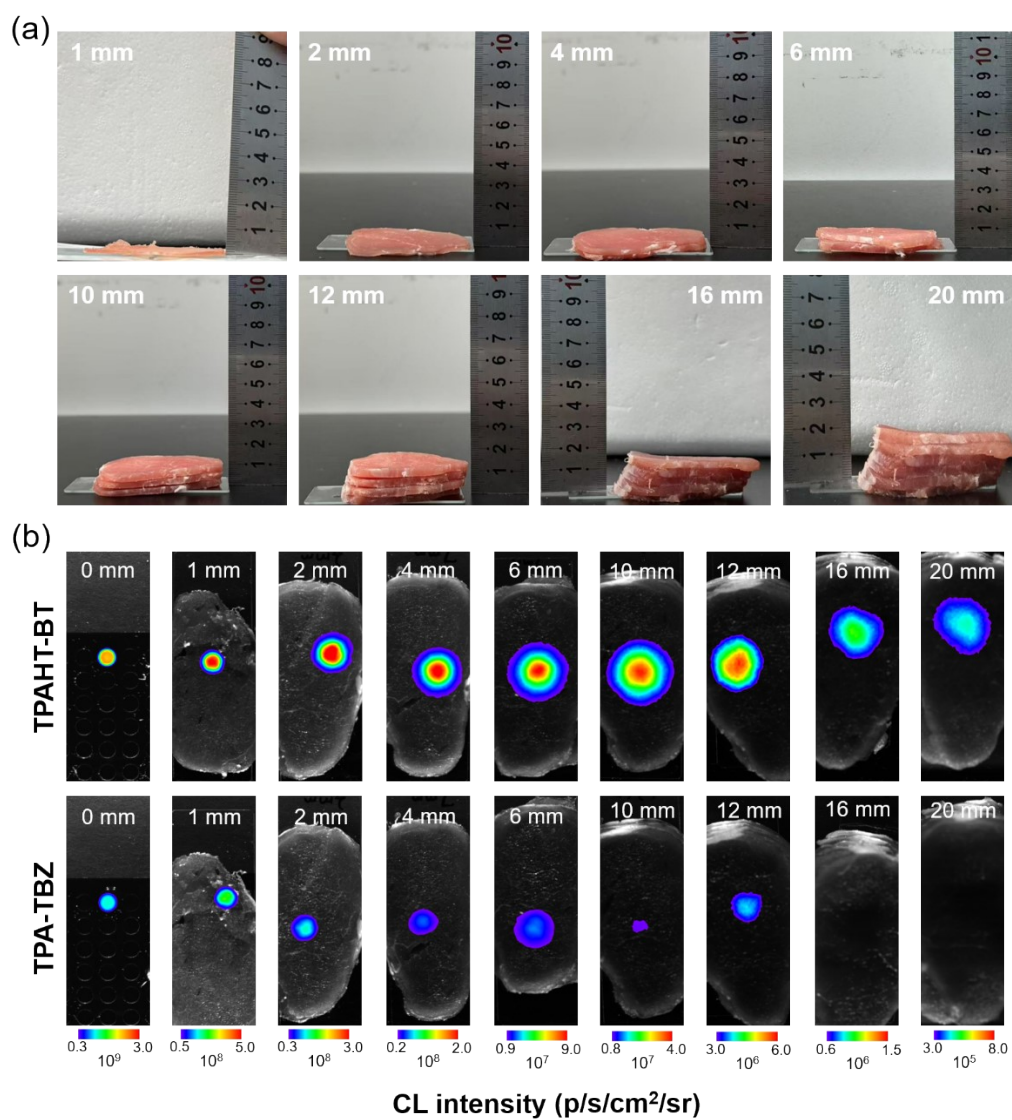

**Figure S23.** (a) The experimental setup of the CL imaging under the cover of tissues with different thicknesses. (b) Tissue penetration depth determination of TPAHT-BT and TPA-TBZ CLdot (1 mg/mL) at 37 °C.

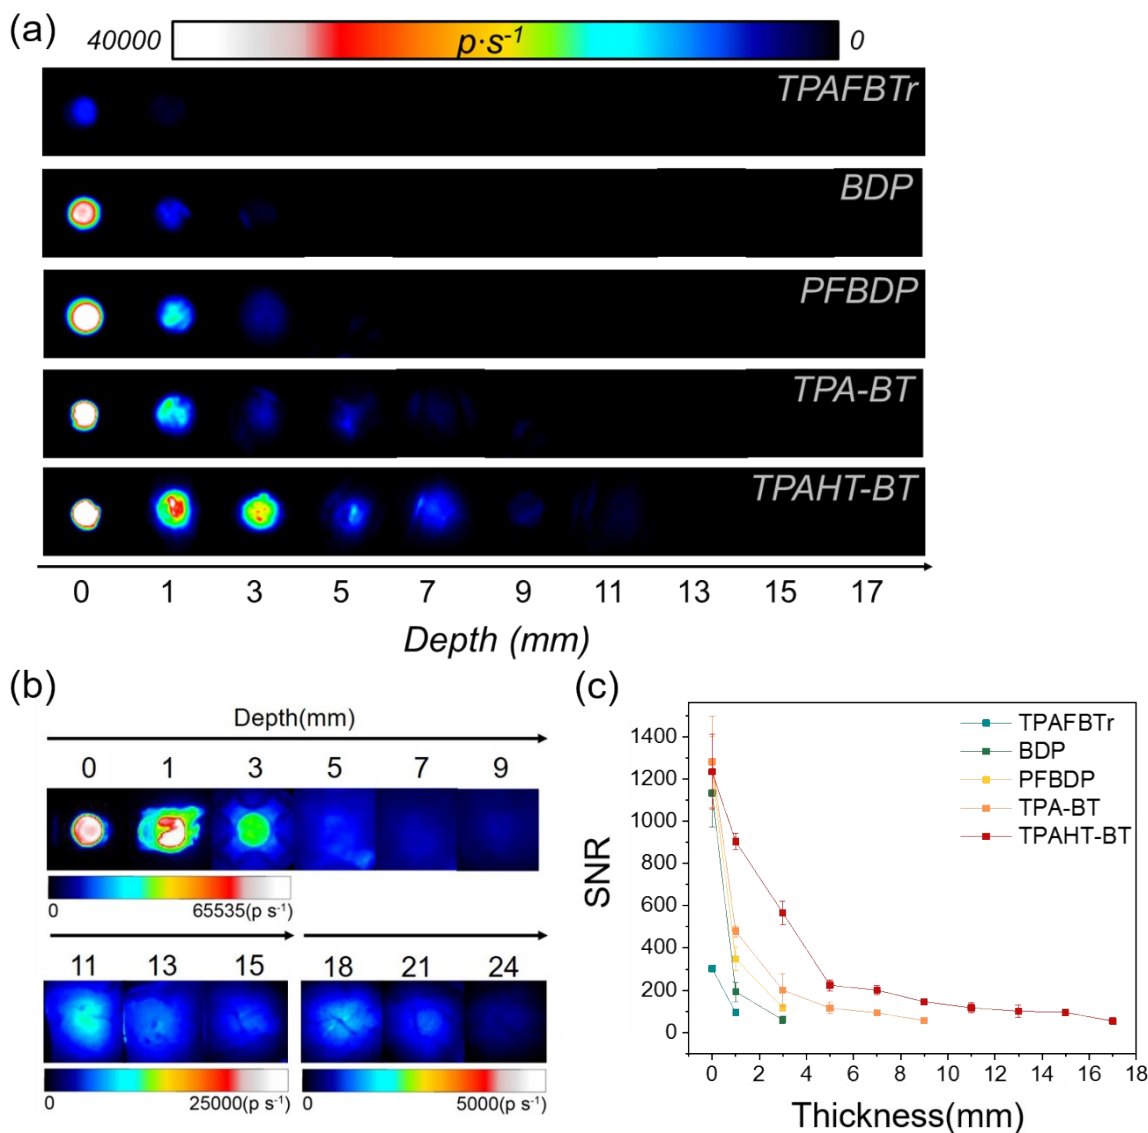

**Figure S24.** (a) Tissue penetration depth determinations of the water-dispersible POCL system separately using TPAFBTr, BDP, PFBDP, TPA-BT and TPAHT-BT as the emitters in chemiluminescence imaging. (b) Tissue penetration depth determination of TPAHT-BT CLdot (1 mg/mL) at 37 °C. (c) Signal-to-noise ratio (SNR) of the chemiluminescent nanoparticles composed of different emitters (including TPA-FBTr, BDP, PFBDP, TPA-BT, and TPAHT-BT) for CL imaging under the cover of tissues with different thickness.

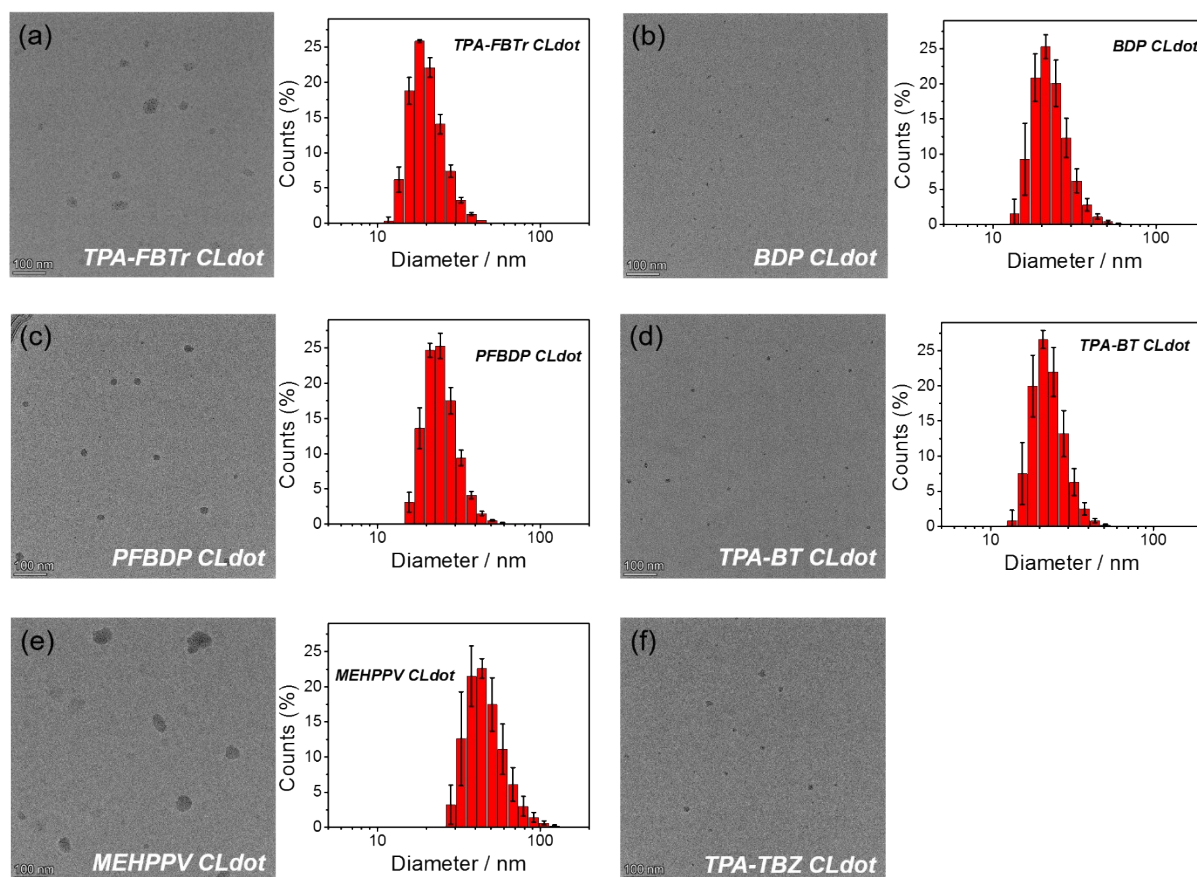

**Figure S25.** TEM image and DLS of (a) TPA-FBTr CLdot, (b) BDP CLdot, (c) PFBDP CLdot, (d) TPA-BT CLdot, (e) MEHPPV CLdot and (f) TPA-TBZ CLdot (DLS can not determined).

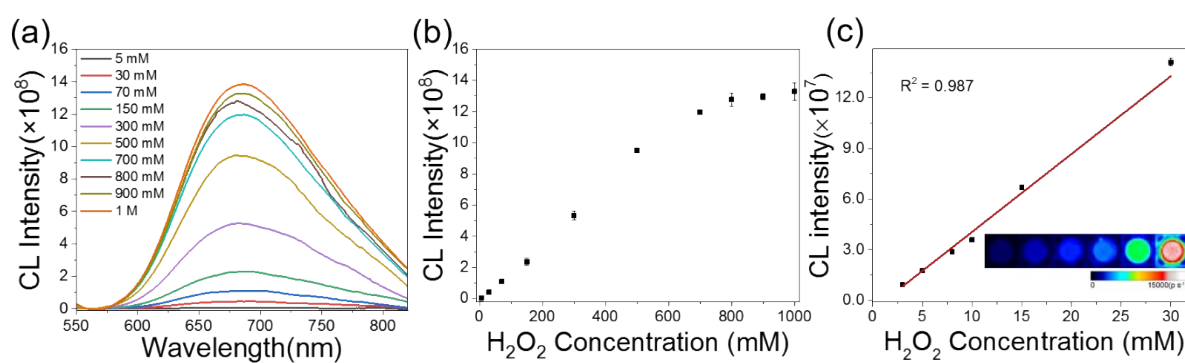

**Figure S26.** (a) CL spectra (smoothed) of TPAHT-BT CLdot upon addition of different concentrations of  $\text{H}_2\text{O}_2$  in aqueous solutions at room temperature. (b) Plots of CL intensities with the concentrations of  $\text{H}_2\text{O}_2$ . (c) Function of the chemiluminescence intensity of TPAHT-BT CLdot (0.1 mg/mL) with the concentrations of  $\text{H}_2\text{O}_2$  (2.5-30 mM) in aqueous solution.



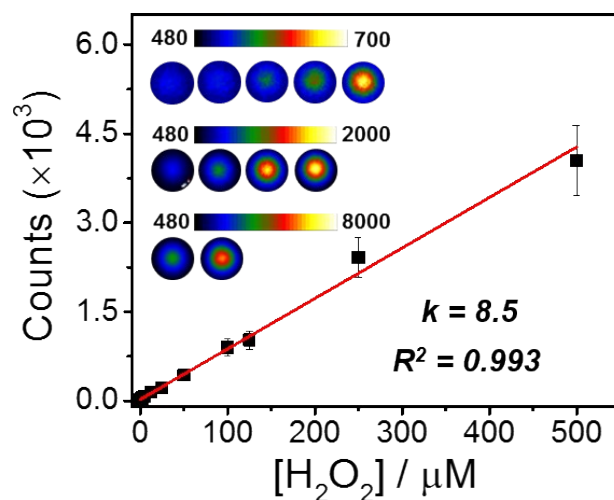

**Figure S27.** Function of the chemiluminescence intensity of TPAHT-BT CLdot (0.1 mg/mL) with the concentrations of  $H_2O_2$  in aqueous solution (0-0.5 mM) determined by IVIS spectrum (PerkinElmer).

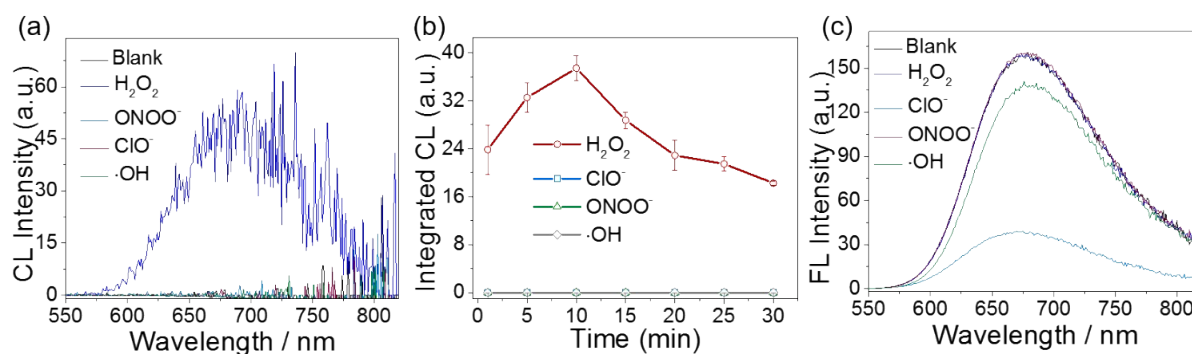

**Figure S28.** (a) Chemiluminescence spectra of TPAHT-BT CLdot aqueous solution (1mg/mL) in the presence of different ROS ( $H_2O_2 \sim 20$  mM,  $ONOO^- \sim 20$  mM,  $ClO^- \sim 20$  mM, and  $\cdot OH \sim 20$  mM) and in the absence of ROS (Blank). (b) Time-dependent CL intensity of TPAHT-BT CLNPs in the presence of 50 mM  $H_2O_2$ ,  $ONOO^-$ ,  $ClO^-$  or  $\cdot OH$  at 37 °C. (c) Fluorescence spectra of TPAHT-BT CLdot aqueous solution (1mg/mL) in the presence of different ROS ( $H_2O_2 \sim 300$  mM,  $ONOO^- \sim 20$  mM,  $ClO^- \sim 20$  mM, and  $\cdot OH \sim 20$  mM) and in the absence of ROS (Blank).

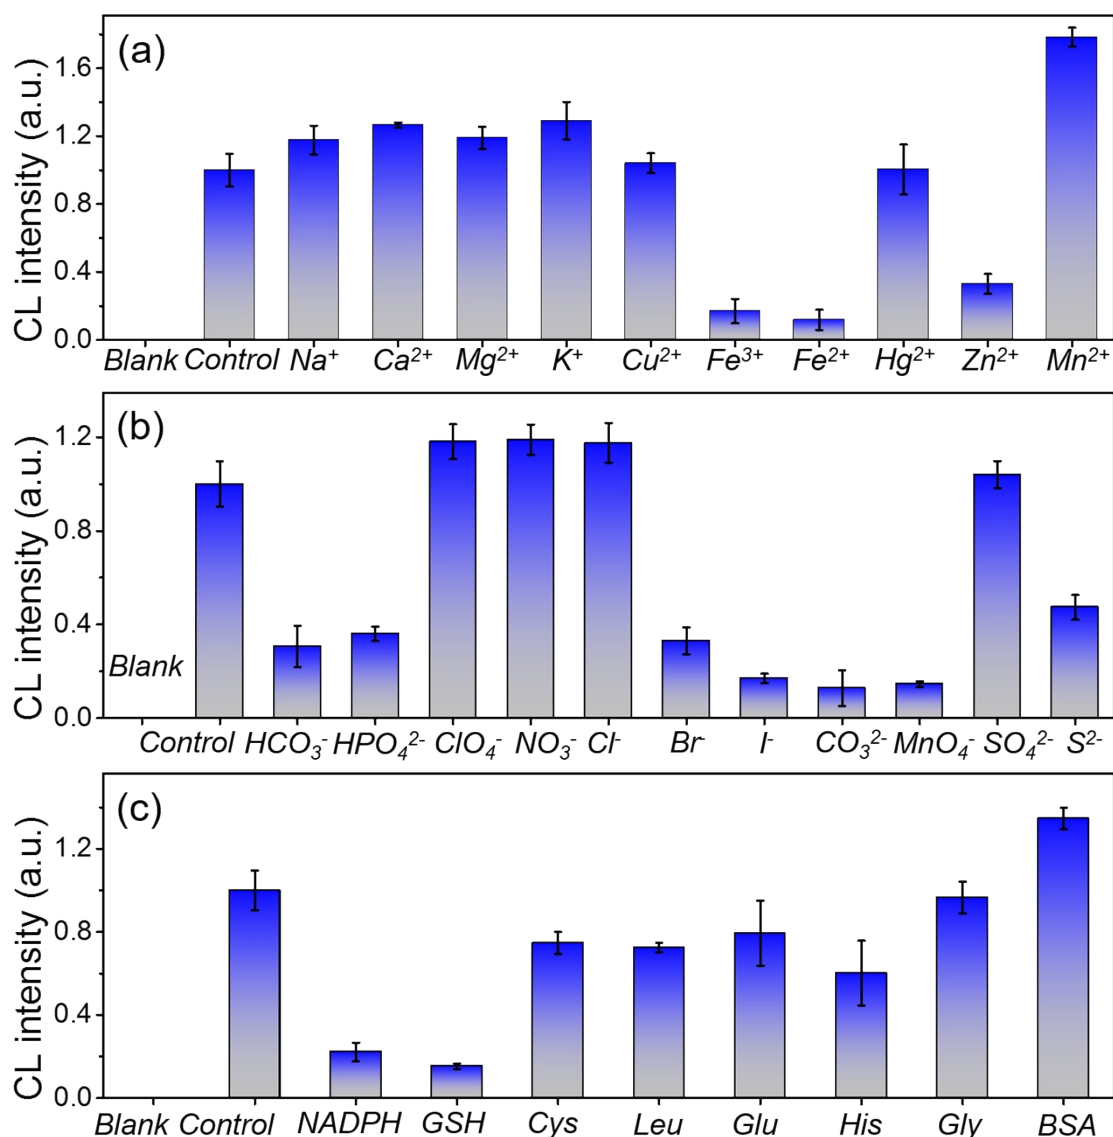

**Figure S29.** (a) Integrated CL intensity of the mixture of TPAHT-BT CLdot, H<sub>2</sub>O<sub>2</sub> (25 mM), and different metal ions (1 mM). (b) Integrated CL intensity of the mixture of TPAHT-BT CLdot, H<sub>2</sub>O<sub>2</sub> (25 mM), and different negative ions (1 mM). (c) Integrated CL intensity of the mixture of TPAHT-BT CLdot, H<sub>2</sub>O<sub>2</sub> (25 mM), and different biomolecules (the concentration of NADPH, glutathione-GSH, cysteine-Cys, leucine-Leu, glutamic acid-Glu, histidine-His or glycine-Gly is 1 mM, respectively, the concentration of Bovine Serum Albumin-BSA is 5 mg/mL). Blank group: TPAHT-BT CLdot solution without H<sub>2</sub>O<sub>2</sub> and other ions or biomolecules. Control group: mixture of TPAHT-BT CLdot and H<sub>2</sub>O<sub>2</sub> (25 mM). n=3

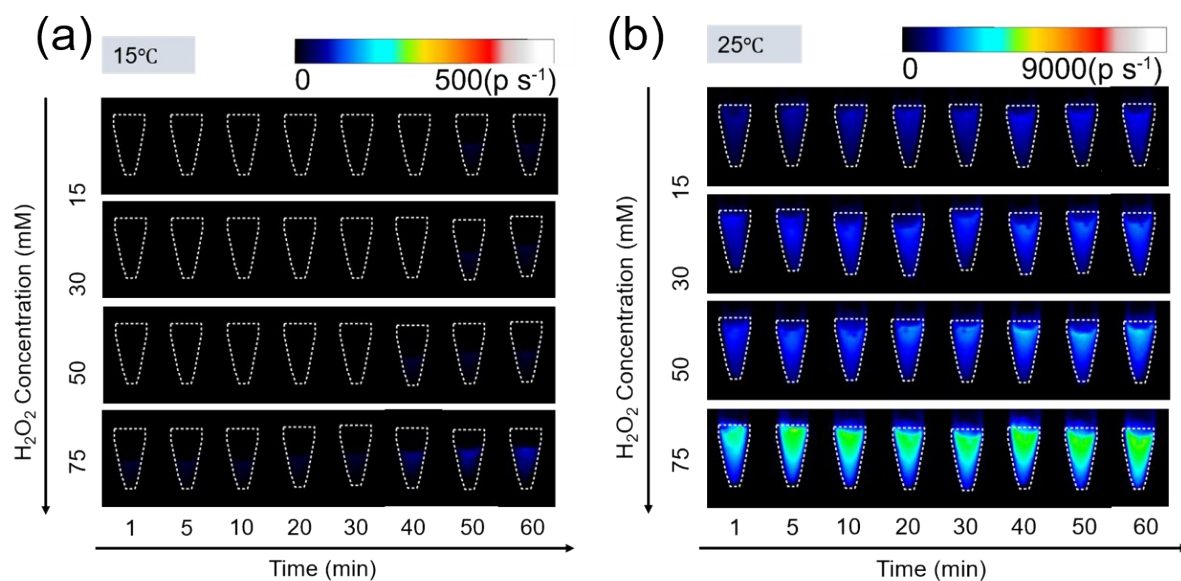

**Figure S30.** Chemiluminescence images of the TPAHT-BT CLdot upon the addition of different concentration of  $H_2O_2$  over time under 15 °C and 25 °C. Exposure time: 1 s.

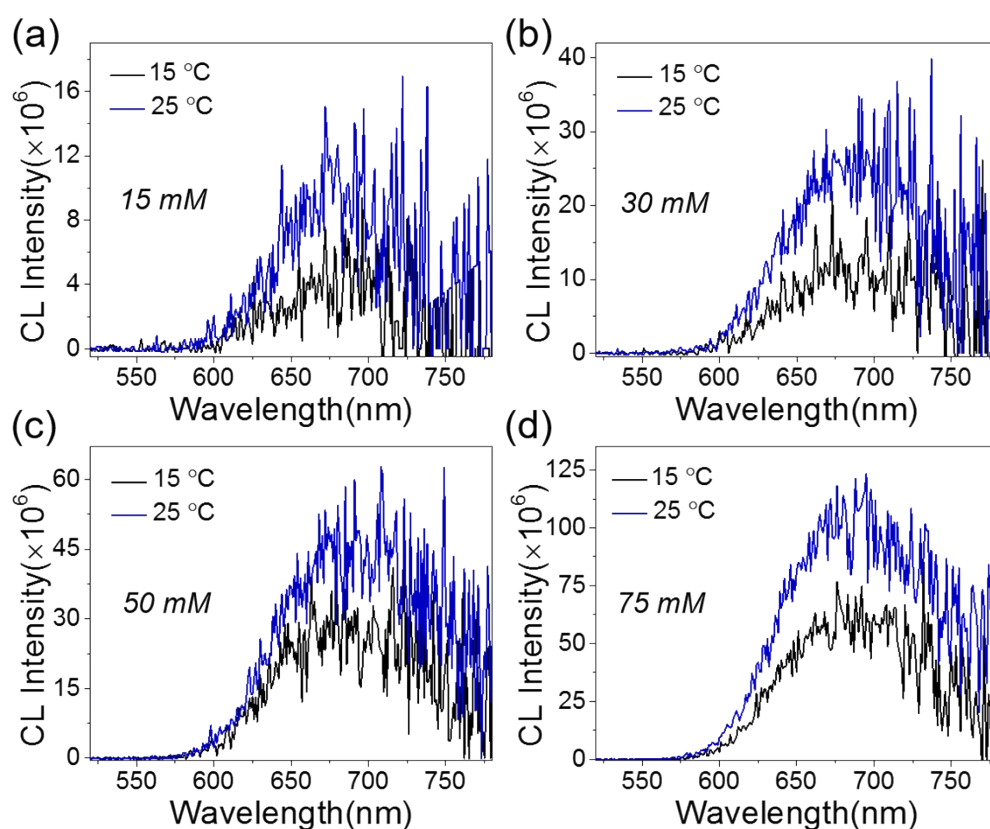

**Figure S31.** Chemiluminescence spectra of the mixtures of TPAHT-BT CLdot and different concentrations of  $H_2O_2$  (a-15 mM, b-30 mM, c-50 mM, and d-75 mM) at 15 °C and 25 °C. The spectra were collected 10 minutes after the addition of  $H_2O_2$  in TPAHT-BT CLdot solutions.

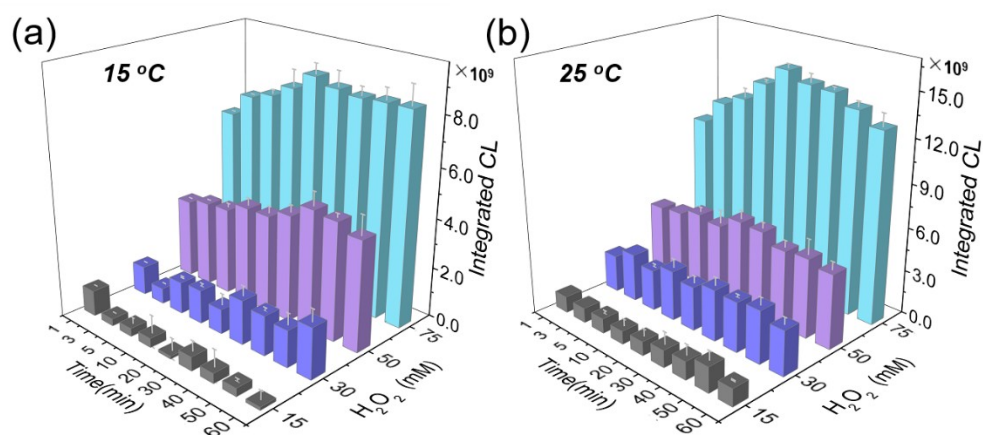

**Figure S32.** Chemiluminescence intensity variations of the TPAHT-BT CLNPs determined by fluorescence spectrometer (determined without light source) upon the addition of different concentration of  $H_2O_2$  over time under 15 °C (a) and 25 °C (b).

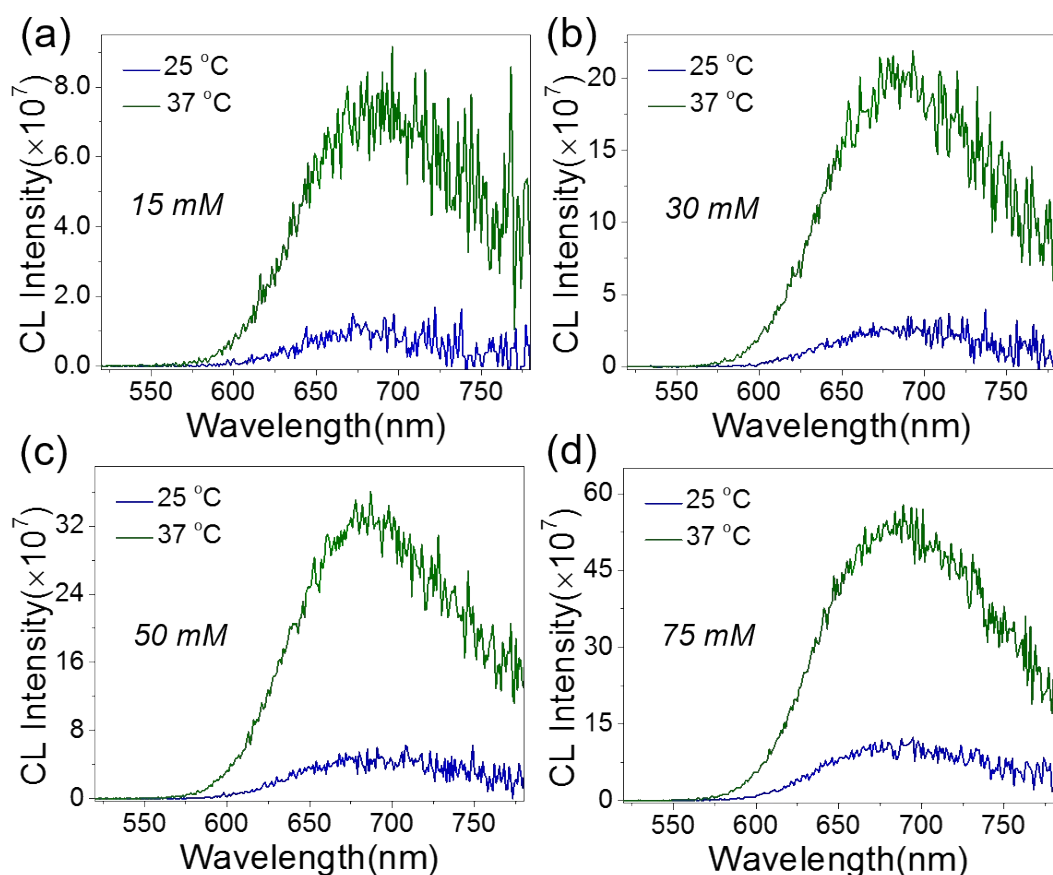

**Figure S33.** Chemiluminescence spectra of the mixtures of TPAHT-BT CLdot and different concentrations of  $H_2O_2$  (a-15 mM, b-30 mM, c-50 mM, and d-75 mM) at 25 °C and 37 °C. The spectra were collected 10 minutes after the addition of  $H_2O_2$  in TPAHT-BT CLdot solutions.

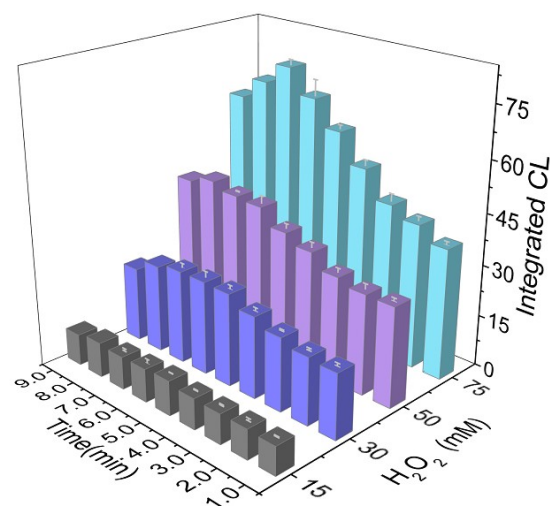

**Figure S34.** Chemiluminescence intensity variations of the TPAHT-BT CLNPs determined by fluorescence spectrometer (determined without light source) upon the addition of different concentration of  $H_2O_2$  over time under 37 °C.

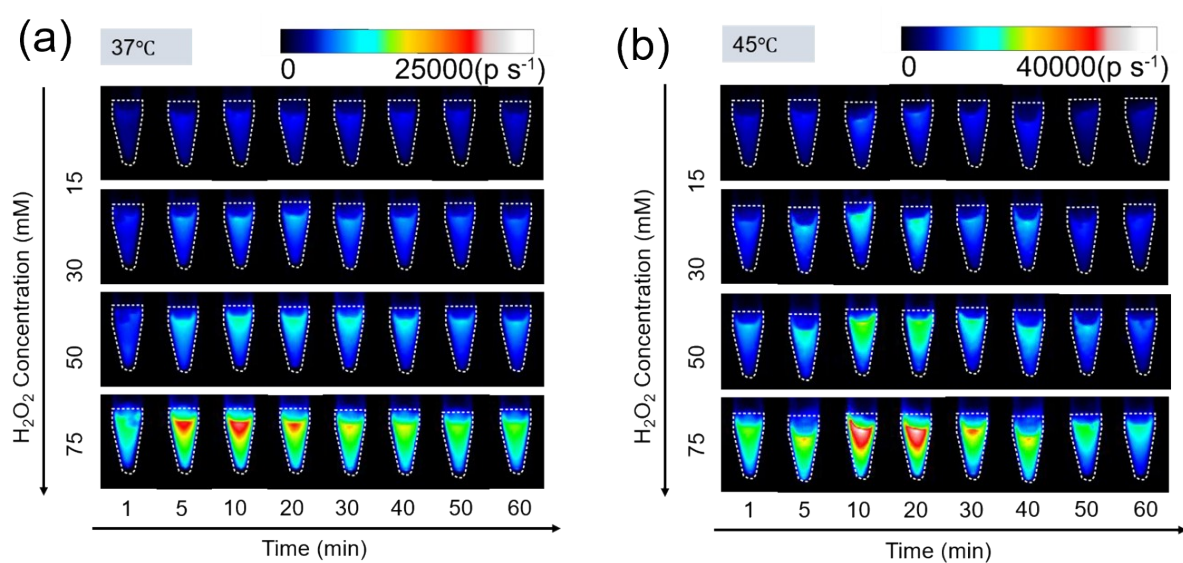

**Figure S35.** Chemiluminescence images of the TPAHT-BT CLdot upon the addition of different concentration of  $H_2O_2$  over time under 37 °C and 45 °C. Exposure time: 1 s.

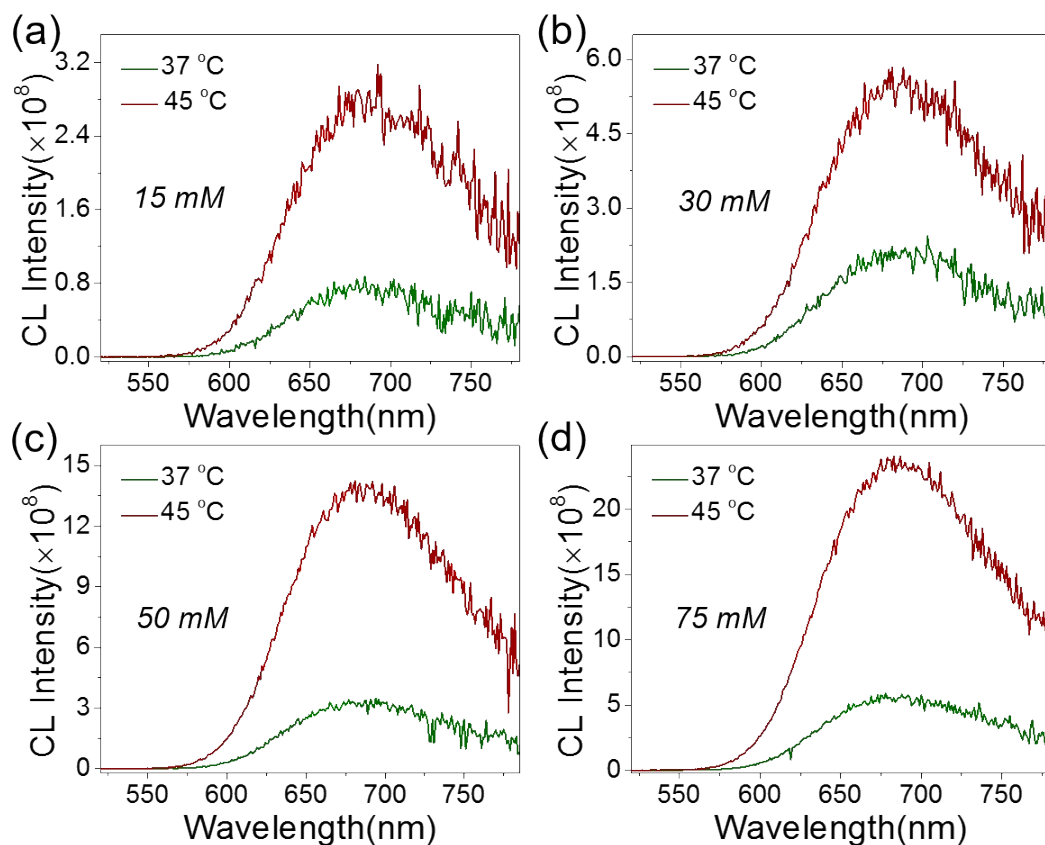

**Figure S36.** Chemiluminescence spectra of the mixtures of TPAHT-BT CLdot and different concentrations of  $\text{H}_2\text{O}_2$  (a-15 mM, b-30 mM, c-50 mM, and d-75 mM) at 45 °C and 37 °C. The spectra were collected 5 min after the addition of  $\text{H}_2\text{O}_2$  in TPAHT-BT CLdot solutions.

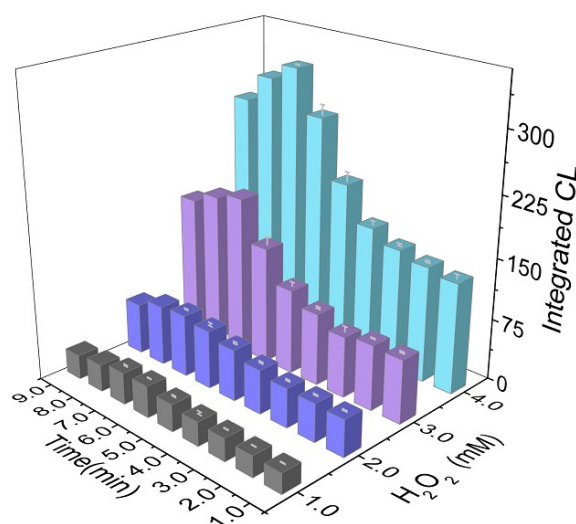

**Figure S37.** Chemiluminescence intensity variations of the TPAHT-BT CLNPs determined by fluorescence spectrometer (determined without light source) upon the addition of different concentration of  $\text{H}_2\text{O}_2$  over time under 37 °C.



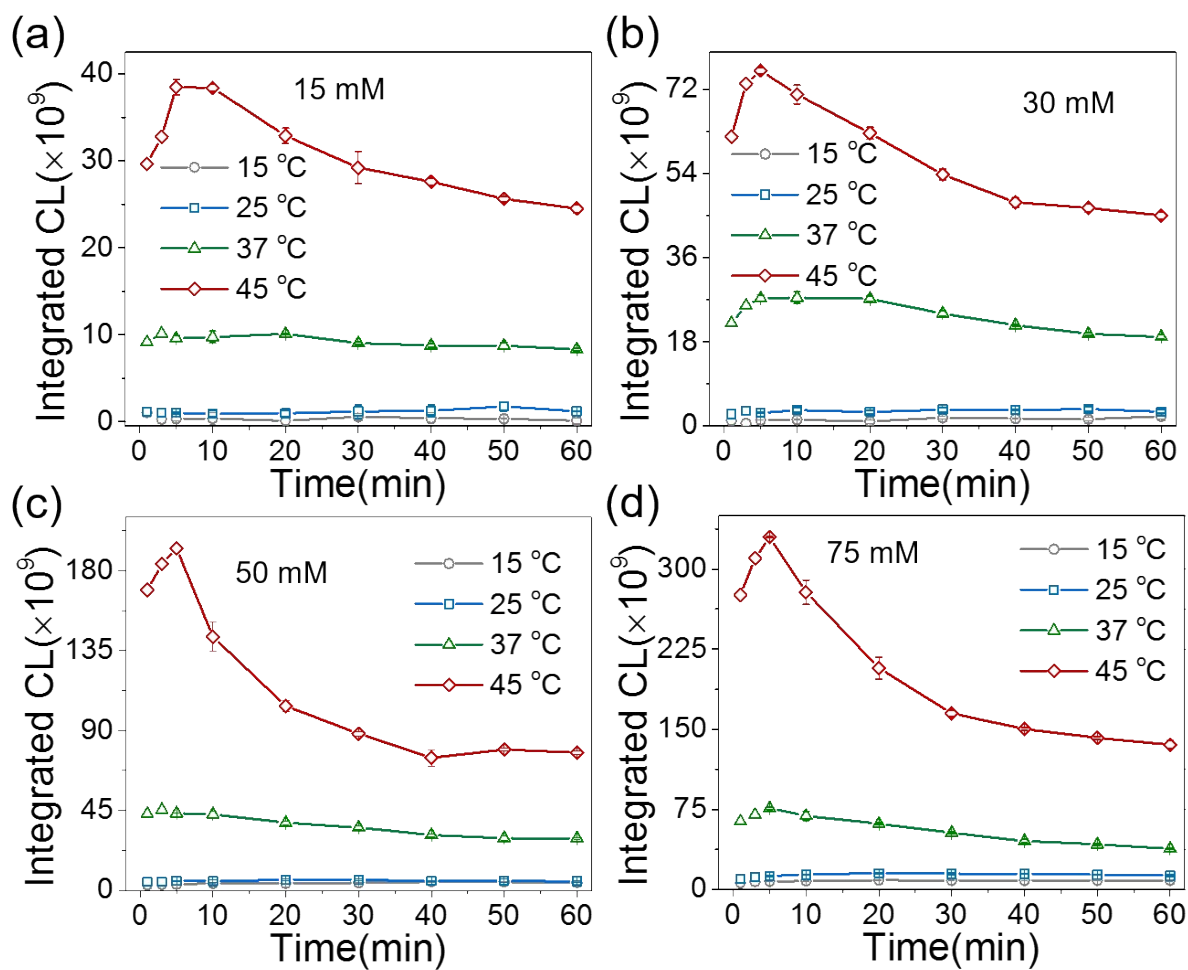

**Figure S38.** Time-dependent CL intensity of TPAHT-BT CLdot in the presence of 15 mM (a), 30 mM (b), 50 mM (c) and 75 mM (d)  $H_2O_2$  at different environmental temperatures.  $n=3$

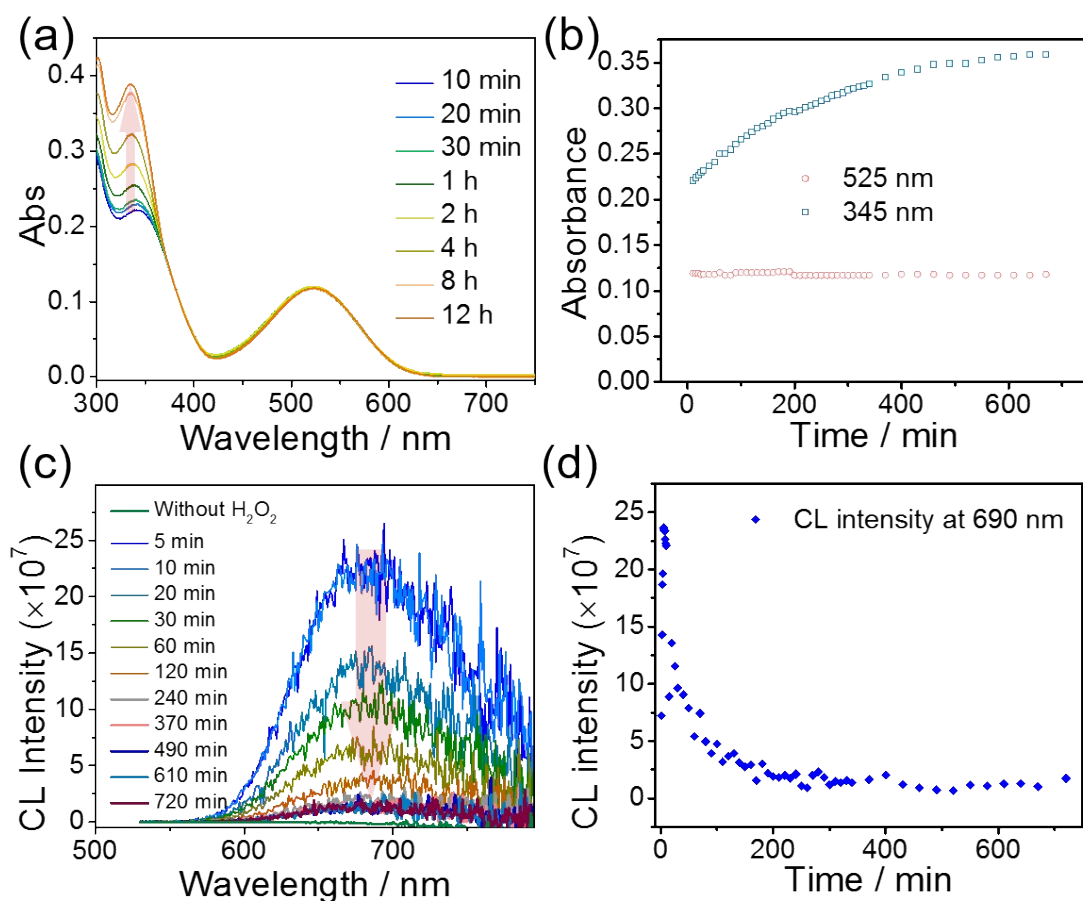

**Figure S39.** (a) Long-term time-dependent absorption spectra of TPAHT-BT CLdot upon addition of 25 mM H<sub>2</sub>O<sub>2</sub> at 37 °C. (b) Long-term time-dependent absorbance variation (separately monitored at 345 nm and 525 nm) of the TPAHT-BT CLdot after addition of H<sub>2</sub>O<sub>2</sub>. (c) Long-term time-dependent chemiluminescence spectra of TPAHT-BT CLdot upon addition of 25 mM H<sub>2</sub>O<sub>2</sub> at 37 °C. (d) Long-term time-dependent absorbance variation (monitored at 690 nm) of the TPAHT-BT CLdot after addition of H<sub>2</sub>O<sub>2</sub>.



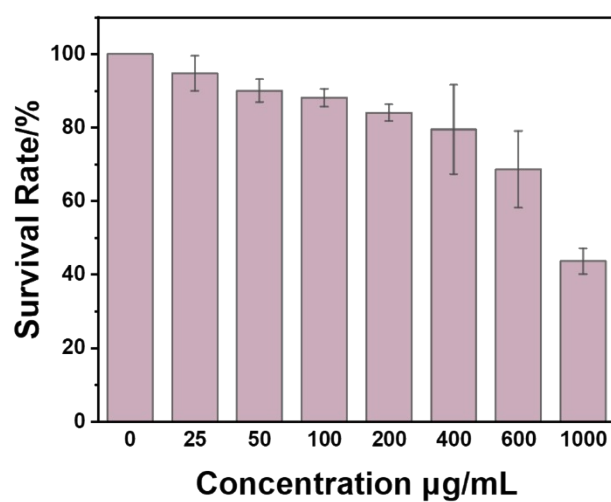

**Figure S40.** Cytotoxicity of TPAHT-BT CLdot over HeLa cell lines.

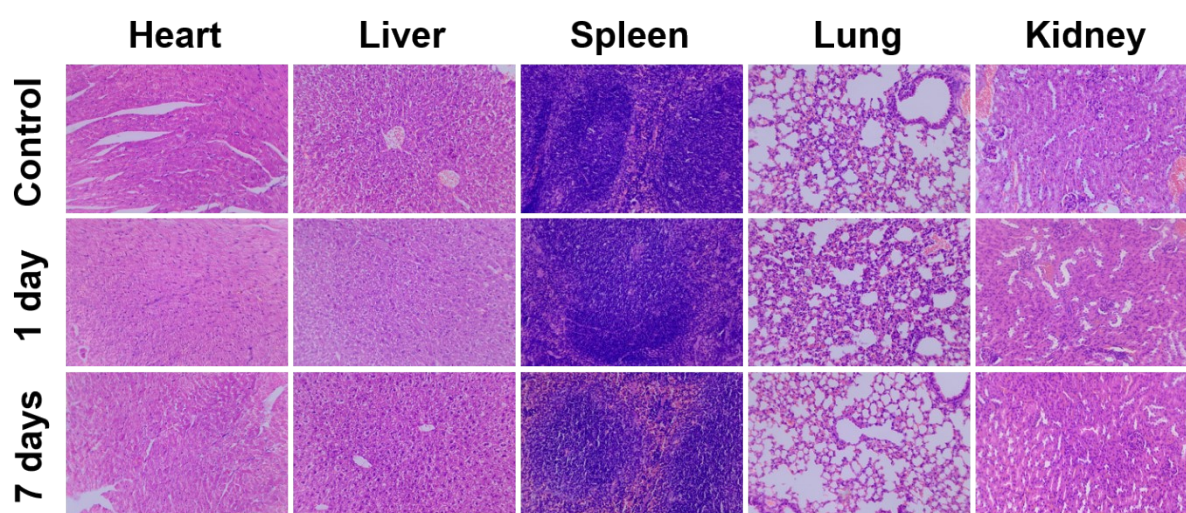

**Figure S41.** H&E-stained tissue sections of the heart, liver, spleen, lung, and kidney harvested from mice after intravenous injection without (control) or with TPAHT-BT CLdot (2.5 mg/mL, 200 µL). Scale bar: 100 µm.

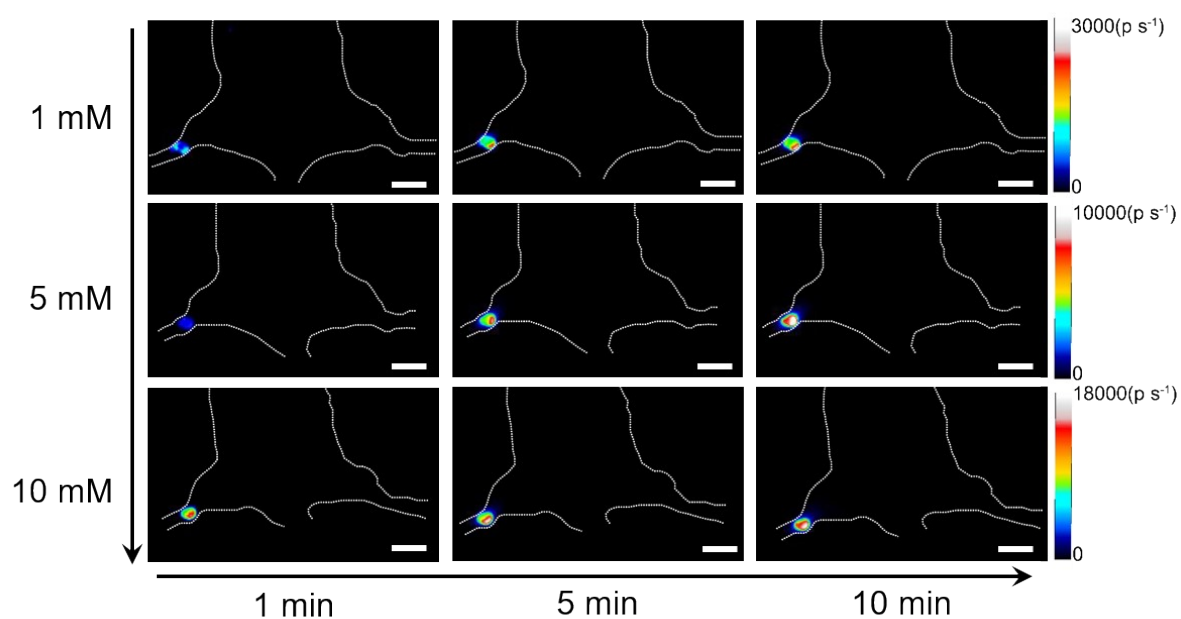

**Figure S42.** *In vivo* CL imaging of articulation injected with different concentrations of  $\text{H}_2\text{O}_2$  at different times.

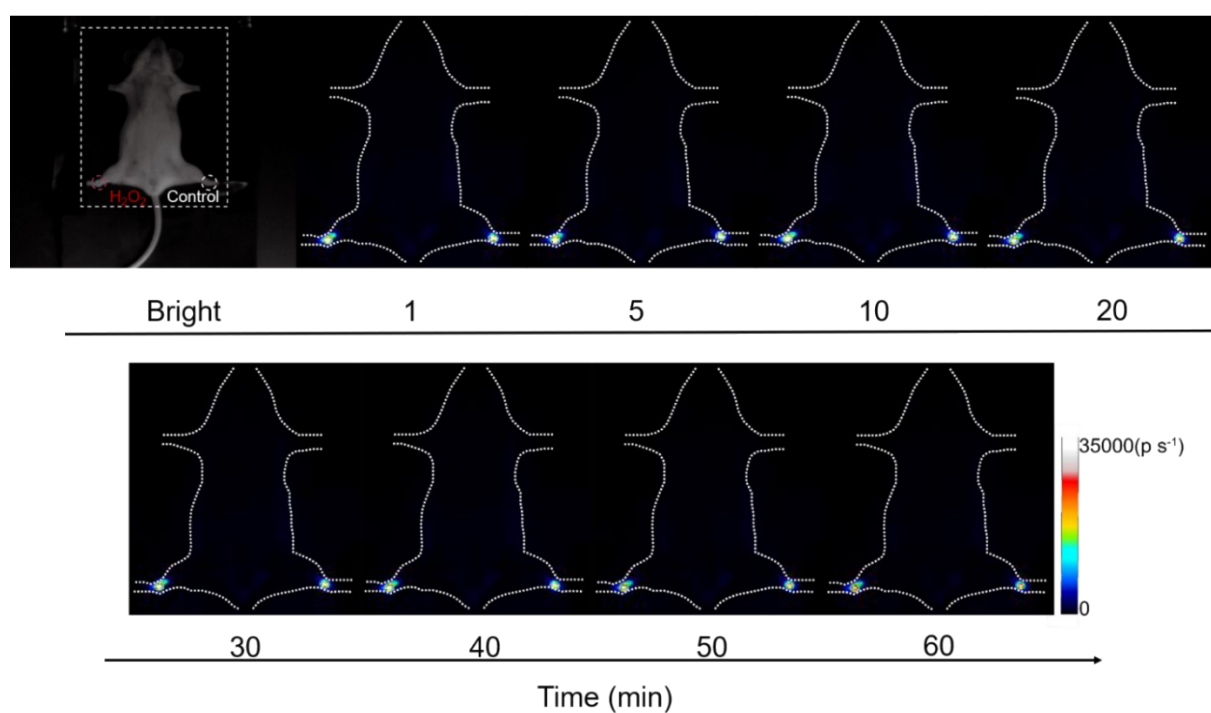

**Figure S43.** *In vivo* FL imaging of TPAHT-BT CLdot injected into lateral articulations (Left: inflammation, Right: control). Excitation: 532 nm, Collect: 700 LP.

**Table S1.** Photophysical properties of different organic luminophors in toluene and other organic solvents (labelled with \*).

| Name                | $\lambda_{\text{max,abs}}$ [nm] | $\varepsilon$ ( $\lambda_{\text{max,abs}}$ )<br>[M <sup>-1</sup> cm <sup>-1</sup> ] | $\lambda_{\text{max,em}}$ [nm] | Brightness<br>( $\varepsilon \times \Phi$ ) | Stokes shift<br>[nm] | Quantum yield<br>$\Phi$ [%] |
|---------------------|---------------------------------|-------------------------------------------------------------------------------------|--------------------------------|---------------------------------------------|----------------------|-----------------------------|
| FT-BT               | 512                             | 31200                                                                               | 631                            | 24000                                       | 119                  | 77.9                        |
| FT-BSeT             | 546                             | 30600                                                                               | 685                            | 12500                                       | 139                  | 40.9                        |
| FHT-BT              | 498                             | 39400                                                                               | 624                            | 30000                                       | 126                  | 76.3                        |
| FHT-BSeT            | 534                             | 28000                                                                               | 678                            | 13600                                       | 144                  | 48.8                        |
| TPAT-BT             | 530                             | 31200                                                                               | 660                            | 19200                                       | 130                  | 61.6                        |
| TPAT-BSeT           | 562                             | 21600                                                                               | 719                            | 5500                                        | 157                  | 25.4                        |
| TPAHT-BT            | 512                             | 25600                                                                               | 656                            | 17000                                       | 144                  | 65.8                        |
| TPAHT-BSeT          | 545                             | 25200                                                                               | 709                            | 7000                                        | 164                  | 28.0                        |
| TPET-BT             | 510                             | 22400                                                                               | 628                            | 14200                                       | 118                  | 63.3                        |
| TPET-BSeT           | 543                             | 19000                                                                               | 679                            | 7700                                        | 136                  | 40.5                        |
| TPEHT-BT            | 499                             | 24800                                                                               | 626                            | 18700                                       | 127                  | 75.5                        |
| TPEHT-BSeT          | 532                             | 20000                                                                               | 677                            | 9000                                        | 145                  | 45.0                        |
| TPA-BT              | 310                             | 22300                                                                               | 558                            | 19800                                       | 140                  | 91.7*                       |
| OTPA-BT             | 482                             | 20800                                                                               | 585                            | 13936                                       | 103                  | 67* (Hexane)                |
| TPE-BT              | 416                             | 26500                                                                               | 516                            | 17100                                       | 122                  | 71.0*                       |
| tDPA-BT             | 481                             | 7936                                                                                | 595                            | 952                                         | 114                  | 12.0*                       |
| TPABT <sub>sr</sub> | 403                             | 21600                                                                               | 473                            | 14400                                       | 70                   | 66.6                        |
| TPAFBT              | 449                             | 26000                                                                               | 576                            | 21400                                       | 127                  | 82.4                        |
| TPAFBT <sub>r</sub> | 394                             | 17000                                                                               | 470                            | 17300                                       | 76                   | ~100                        |
| TPA-TBZ             | 613                             | 24832                                                                               | 759                            | 11147                                       | 146                  | 46.2                        |
| TPA-QX              | 622                             | 10696                                                                               | 778                            | 2246                                        | 156                  | 21.0                        |
| TPAHT-BBT           | 720                             | 27000                                                                               | 957                            | 297                                         | 237                  | 11*                         |
| SQ650               | 644                             | 99000                                                                               | 663                            | 94700                                       | 19                   | 91*                         |
| SQ640               | 642                             | 364700                                                                              | 655                            | 308500                                      | 13                   | 84.6*                       |
| SQ680               | 700                             | 239100                                                                              | 715                            | 155400                                      | 15                   | 65*                         |
| RhB                 | 544                             | 101000                                                                              | 569                            | 65600                                       | 25                   | 65* (EtOH)                  |
| Rh101               | 565                             | 118600                                                                              | 588                            | 108300                                      | 23                   | 91.3* (EtOH)                |
| Rubrene             | 521                             | 49000                                                                               | 553                            | 13200                                       | 32                   | 27*                         |
| BDP                 | 503                             | 80000                                                                               | 513                            | 70320                                       | 10                   | 92*<br>(Chloroform)         |
| PFBDP               | 545                             | 28600                                                                               | 562                            | 26900                                       | 17                   | 93.7*                       |

|             |     |        |     |        |     |                      |
|-------------|-----|--------|-----|--------|-----|----------------------|
| BDP-590     | 567 | 138800 | 579 | 133250 | 12  | 96                   |
| BDP-650     | 643 | 243200 | 670 | 126500 | 27  | 52.0 (DMSO)          |
| Cy3         | 552 | 255900 | 570 | 96470  | 18  | 37.7                 |
| Cy5         | 647 | 234000 | 669 | 77900  | 22  | 33.3(EtOH)           |
| Cy7         | 755 | 127300 | 790 | 32840  | 35  | 25.8(DMSO)           |
| Coumarin102 | 390 | 22000  | 465 | 17100  | 75  | 78* (EtOH)           |
| Coumarin153 | 423 | 20000  | 530 | 10800  | 107 | 54.4* (EtOH)         |
| DPA         | 373 | 13600  | 405 | 12200  | 32  | 90*<br>(Cyclohexane) |
| DPEA        | 454 | /      | 476 | /      | 22  | 85*                  |
| PFO         | 380 | /      | 415 | /      | 45  | 82.8                 |
| PFOPV       | 452 | /      | 500 | /      | 48  | 79.5                 |
| F8BT        | 458 | /      | 525 | /      | 67  | 82.4                 |
| PFODBT      | 563 | /      | 665 | /      | 102 | 32.5                 |
| PFOHTBT     | 509 | /      | 632 | /      | 123 | 86.7                 |
| MEH-PPV     | 505 | /      | 555 | /      | 50  | 26.9                 |
| CN-PPV      | 450 | /      | 555 | /      | 105 | 42.5                 |
| TBQx-TF     | 570 | /      | 610 | /      | 40  | 21.4                 |
| PFN-DOF     | 390 | /      | 418 | /      | 28  | 78.7                 |

---

**Table S2.** Electron energy levels of different organic luminophors and their maximum absorption and emission wavelengths. The fluorescence quantum yield of the chemiluminescent nanoparticles composed by different luminophors in aqueous solution.

| Name                | HOMO  | LUMO  | $\Delta E_{\text{LUMO}}$<br>LUMO <sub>Dye</sub> -LUMO <sub>DOD</sub> | $\Delta E_{\text{HOMO}}$<br>HOMO <sub>Dye</sub> -HOMO <sub>DOD</sub> | $\lambda_{\text{max,abs}}$<br>[nm] | $\lambda_{\text{max,em}}$<br>[nm] | $\Phi_{\text{NP}}$ [%] |
|---------------------|-------|-------|----------------------------------------------------------------------|----------------------------------------------------------------------|------------------------------------|-----------------------------------|------------------------|
| DOD                 | -9.01 | -3.2  | -                                                                    | -                                                                    |                                    |                                   | -                      |
| FT-BT               | -4.86 | -2.63 | 0.57                                                                 | 4.15                                                                 | 522                                | 651                               | 41.2                   |
| FT-BSeT             | -4.83 | -2.7  | 0.5                                                                  | 4.18                                                                 | 557                                | 709                               | 9.4                    |
| FHT-BT              | -4.88 | -2.53 | 0.67                                                                 | 4.13                                                                 | 510                                | 642                               | 41.3                   |
| FHT-BSeT            | -4.82 | -2.62 | 0.58                                                                 | 4.19                                                                 | 543                                | 694                               | 12.4                   |
| TPAT-BT             | -4.66 | -2.53 | 0.67                                                                 | 4.35                                                                 | 537                                | 695                               | 12.3                   |
| TPAT-BSeT           | -4.63 | -2.6  | 0.6                                                                  | 4.38                                                                 | 569                                | 742                               | 2.3                    |
| TPAHT-BT            | -4.73 | -2.48 | 0.72                                                                 | 4.28                                                                 | 520                                | 678                               | 29.5                   |
| TPAHT-BSeT          | -4.69 | -2.56 | 0.64                                                                 | 4.32                                                                 | 556                                | 723                               | 5.3                    |
| TPET-BT             | -4.88 | -2.62 | 0.58                                                                 | 4.13                                                                 | 516                                | 651                               | 28.4                   |
| TPET-BSeT           | -4.85 | -2.69 | 0.51                                                                 | 4.16                                                                 | 550                                | 702                               | 6.0                    |
| TPEHT-BT            | -4.95 | -2.51 | 0.69                                                                 | 4.06                                                                 | 508                                | 650                               | 22.4                   |
| TPEHT-BSeT          | -4.9  | -2.59 | 0.61                                                                 | 4.11                                                                 | 540                                | 692                               | 11.1                   |
| TPA-BT              | -4.77 | -2.28 | 0.92                                                                 | 4.24                                                                 | 470                                | 610                               | 33.3                   |
| OTPA-BT             | -4.38 | -2.07 | 1.13                                                                 | 4.63                                                                 | 502                                | 648                               | 14.0                   |
| TPE-BT              | -5.12 | -2.39 | 0.81                                                                 | 3.89                                                                 | 425                                | 520                               | 45.3                   |
| tDPA-BT             | -4.57 | -2.13 | 1.07                                                                 | 4.44                                                                 | 485                                | 643                               | 6.1                    |
| TPABT <sub>sr</sub> | -4.68 | -1.51 | 1.69                                                                 | 4.33                                                                 | 405                                | 490                               | 15.8                   |
| TPAFBT              | -4.86 | -2.38 | 0.82                                                                 | 4.15                                                                 | 455                                | 588                               | 46.5                   |
| TPAFBTr             | -4.73 | -1.65 | 1.55                                                                 | 4.28                                                                 | 395                                | 480                               | 9.0                    |
| TPA-TBZ             | -4.59 | -2.69 | 0.51                                                                 | 4.42                                                                 | 625                                | 780                               | 19.8                   |
| TPA-QX              | -4.73 | -2.85 | 0.35                                                                 | 4.28                                                                 | 626                                | 795                               | 9.9                    |
| TPAHT-BBT           | -4.49 | -3.29 | -0.09                                                                | 4.52                                                                 | 728                                | /                                 | /                      |
| SQ650               | -4.52 | -2.31 | 0.89                                                                 | 4.49                                                                 | 625                                | 645                               | 3.7                    |
| SQ640               | -4.62 | -2.26 | 0.94                                                                 | 4.39                                                                 | 645                                | 665                               | 2.7                    |
| SQ680               | -4.68 | -2.59 | 0.61                                                                 | 4.33                                                                 | 680                                | 710                               | 1.7                    |
| RhB                 | -8.32 | -5.56 | -2.36                                                                | 0.79                                                                 | 553                                | 580                               | 40.8                   |
| Rh101               | -7.70 | -4.93 | -1.71                                                                | 1.31                                                                 | 575                                | 597                               | 46.5                   |
| Rubrene             | -4.62 | -2.09 | 1.11                                                                 | 4.38                                                                 | 530                                | 562                               | 25.3                   |
| BDP                 | -5.33 | -2.32 | 0.88                                                                 | 3.68                                                                 | 503                                | 516                               | 63.5                   |

|             |       |       |       |      |     |     |      |
|-------------|-------|-------|-------|------|-----|-----|------|
| PFBDP       | -5.41 | -2.62 | 0.58  | 3.60 | 548 | 560 | 75.8 |
| BDP-590     | -5.03 | -2.59 | 0.61  | 3.98 | 569 | 580 | 68.1 |
| BDP-650     | -5.14 | -2.88 | 0.32  | 3.87 | 635 | 650 | 29.2 |
| Cy3         | -7.90 | -5.11 | -1.91 | 1.11 | 558 | 574 | 6.0  |
| Cy5         | -7.52 | -5.15 | -1.95 | 1.49 | 656 | 686 | 18.3 |
| Cy7         | -7.24 | -5.12 | -1.92 | 1.77 | 760 | 798 | 5.2  |
| Coumarin102 | -5.04 | -1.13 | 2.07  | 3.97 | 395 | 488 | 55.7 |
| Coumarin153 | -5.33 | -1.74 | 1.46  | 3.68 | 419 | 526 | 10.6 |
| DPA         | -5.05 | -1.60 | 1.60  | 3.96 | 400 | 423 | 4.3  |
| DPEA        | -4.93 | -2.30 | 0.90  | 4.08 | 468 | 478 | 23.0 |
| PFO         | -5.11 | -1.50 | 1.70  | 3.90 | 401 | 440 | 13.7 |
| PFOPV       | -4.56 | -1.86 | 1.34  | 4.45 | 455 | 503 | 7.3  |
| F8BT        | -5.22 | -2.50 | 0.96  | 3.63 | 472 | 545 | 34.3 |
| PFODBT      | -4.83 | -2.72 | 0.48  | 4.18 | 555 | 685 | 5.5  |
| PFOHTBT     | -4.85 | -2.60 | 0.60  | 4.27 | 525 | 649 | 19.1 |
| MEH-PPV     | -4.71 | -1.74 | 1.46  | 4.30 | 515 | 592 | 6.5  |
| CN-PPV      | -5.36 | -2.54 | 0.66  | 3.65 | 450 | 570 | 56.4 |
| TBQx-TF     | -5.25 | -2.12 | 1.08  | 3.76 | 589 | 700 | 1.6  |
| PFN-DOF     | -5.09 | -1.38 | 1.82  | 4.92 | 390 | 425 | 16.2 |

---

## Fluorescence quantum yield determination

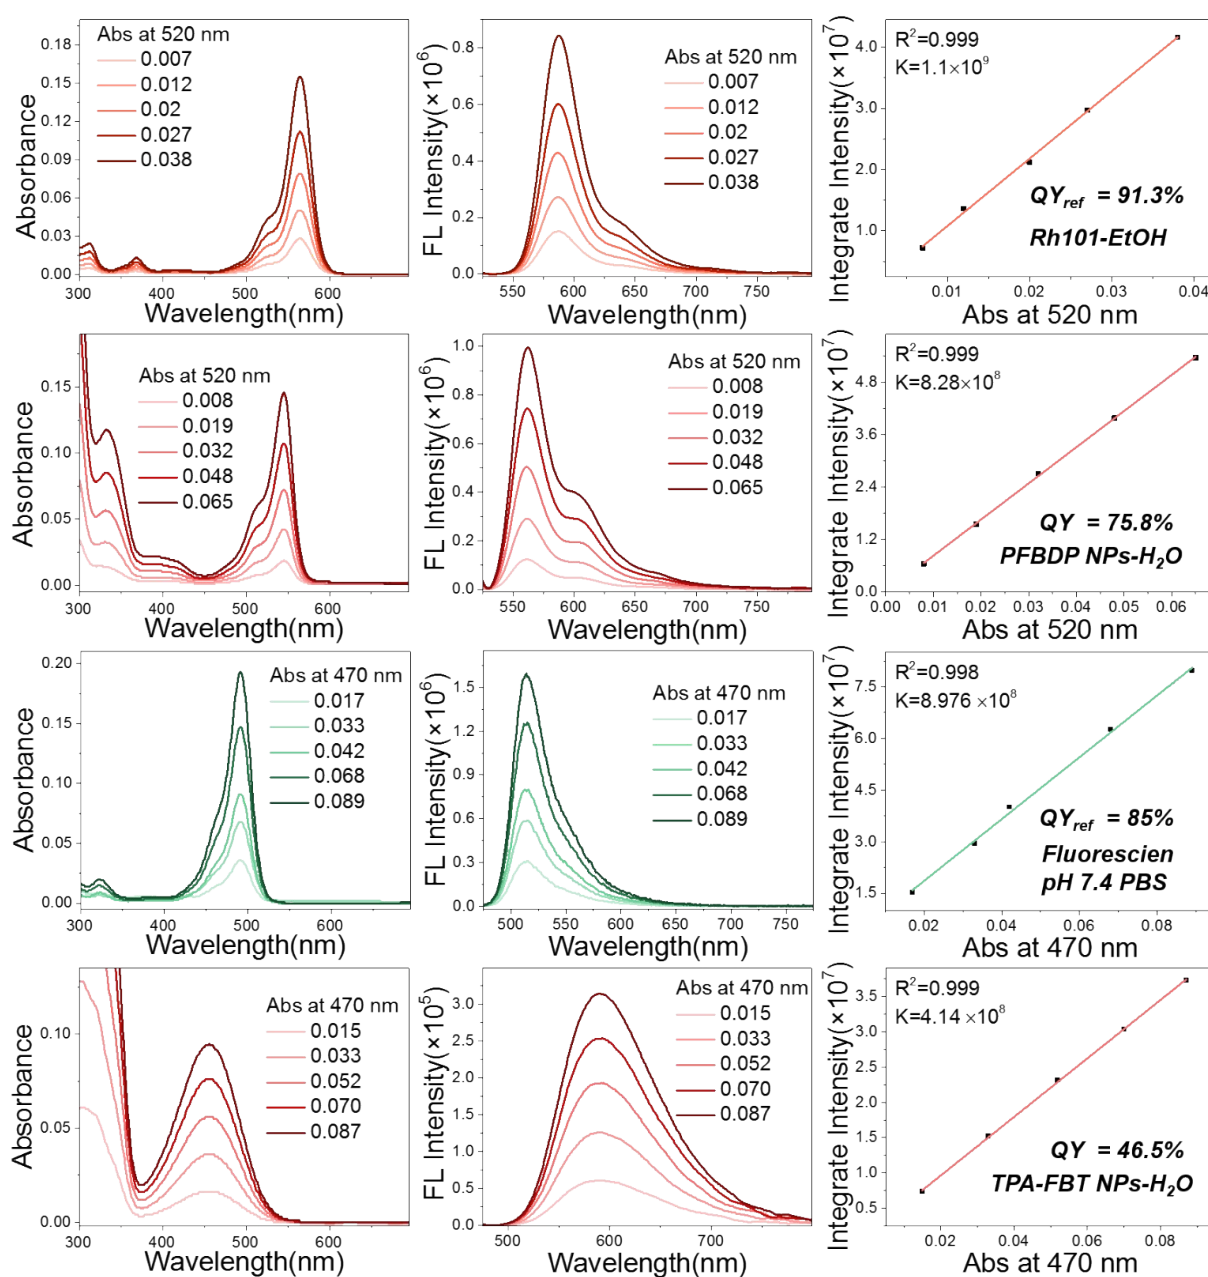

PFBDP NPs and TPA-FBT NPs

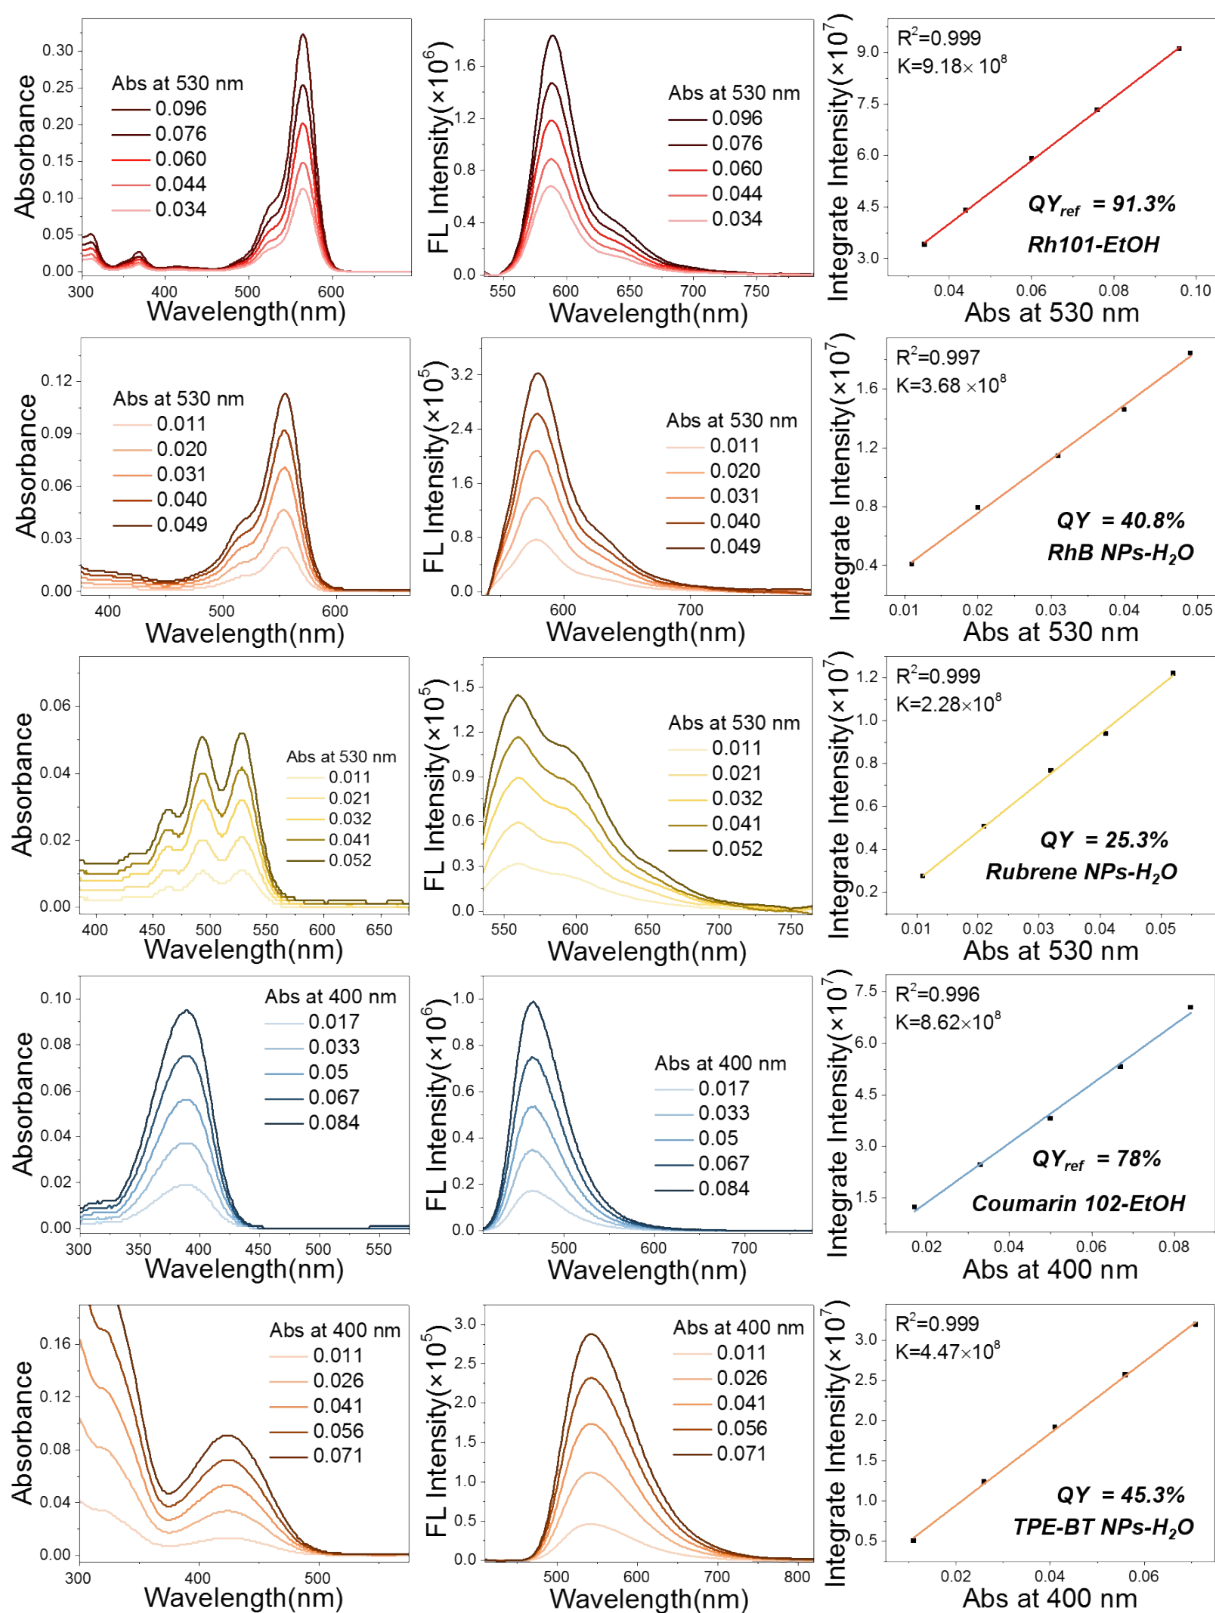

**RhB NPs, Rubrene NPs, and TPEBT NPs**



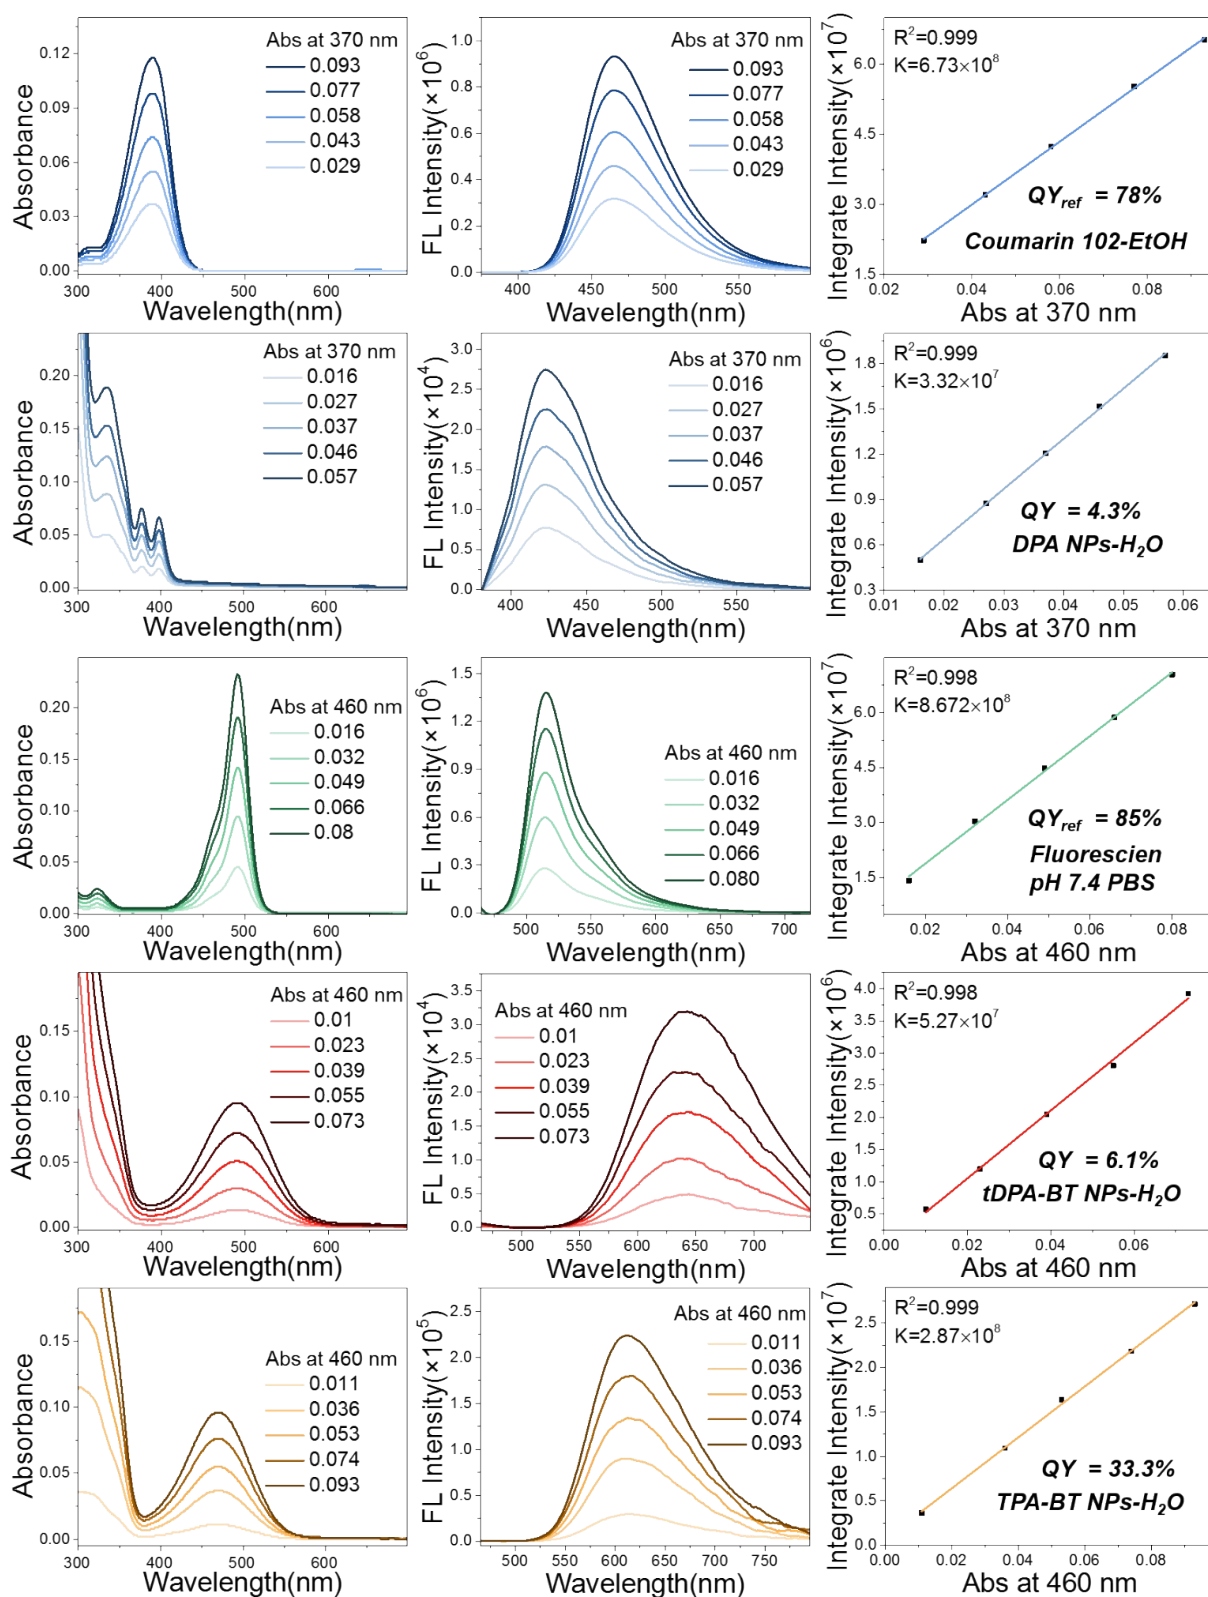

**DPA NPs, tDPA-BT NPs, and TPA-BT NPs**

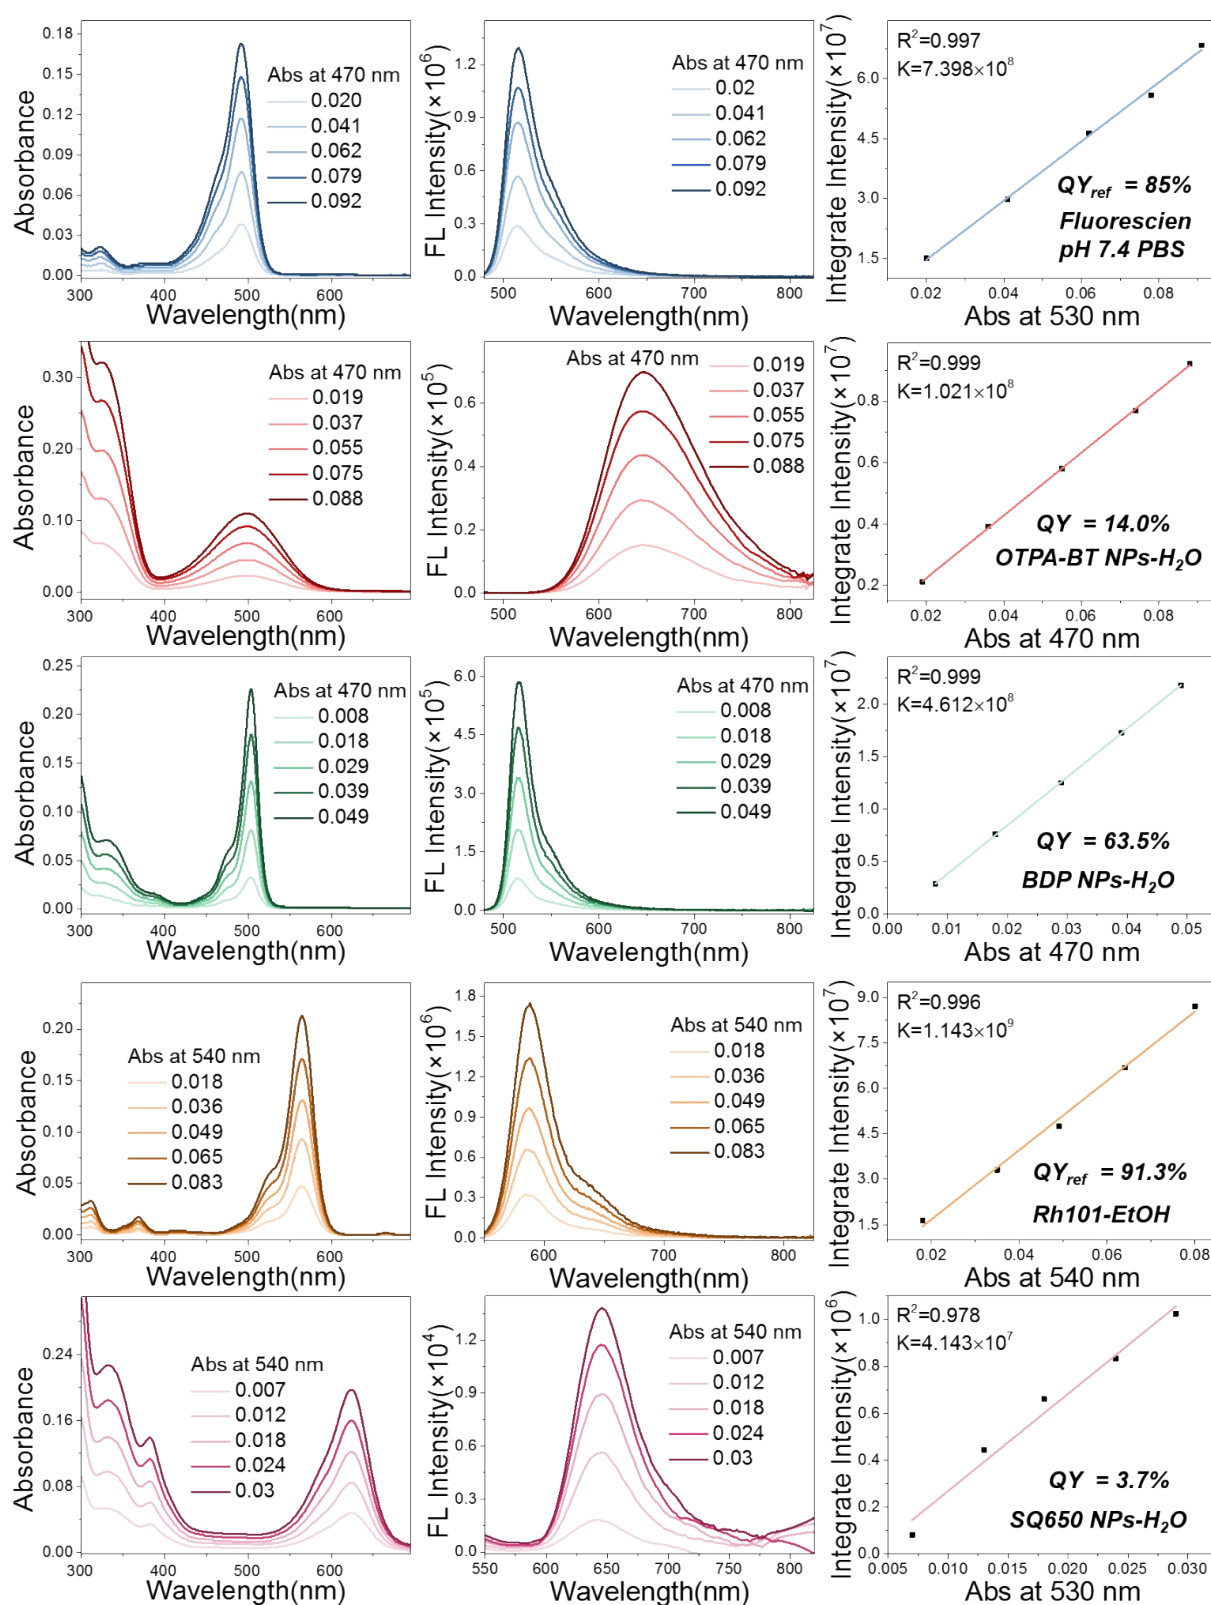

OTPA-BT NPs, BDP NPs, and SQ650 NPs

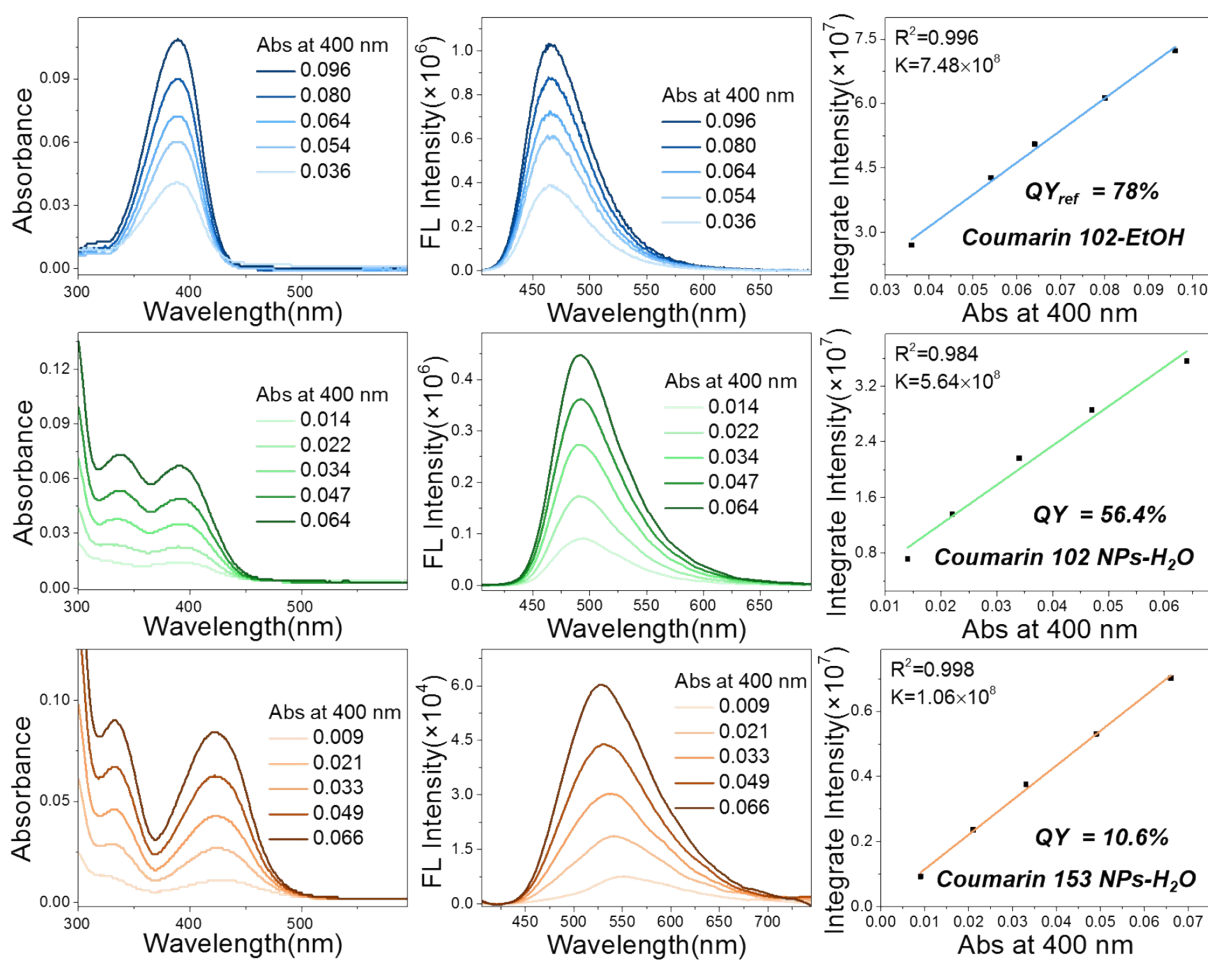

**Coumarin 102 NPs and Coumarin 153 NPs**

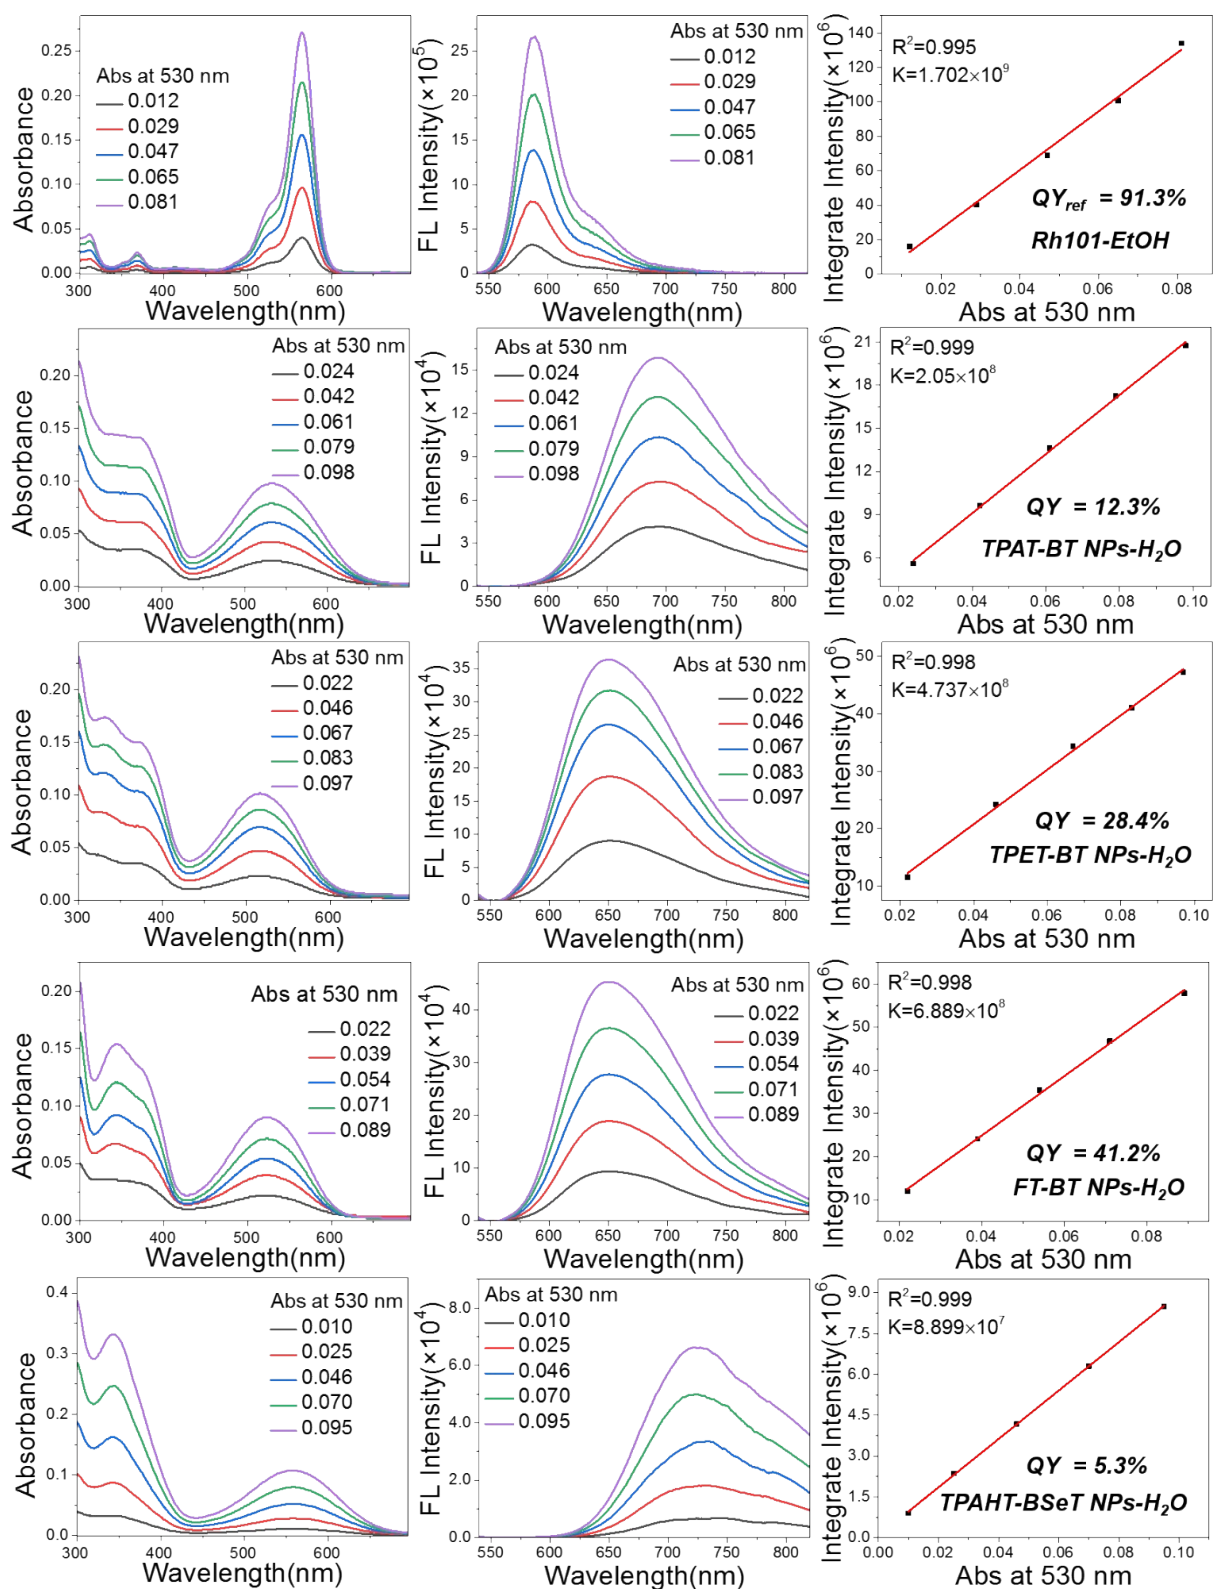

TPAT-BT NPs, TPET-BT NPs, FT-BT NPs, and TPAHT-BSeT NPs

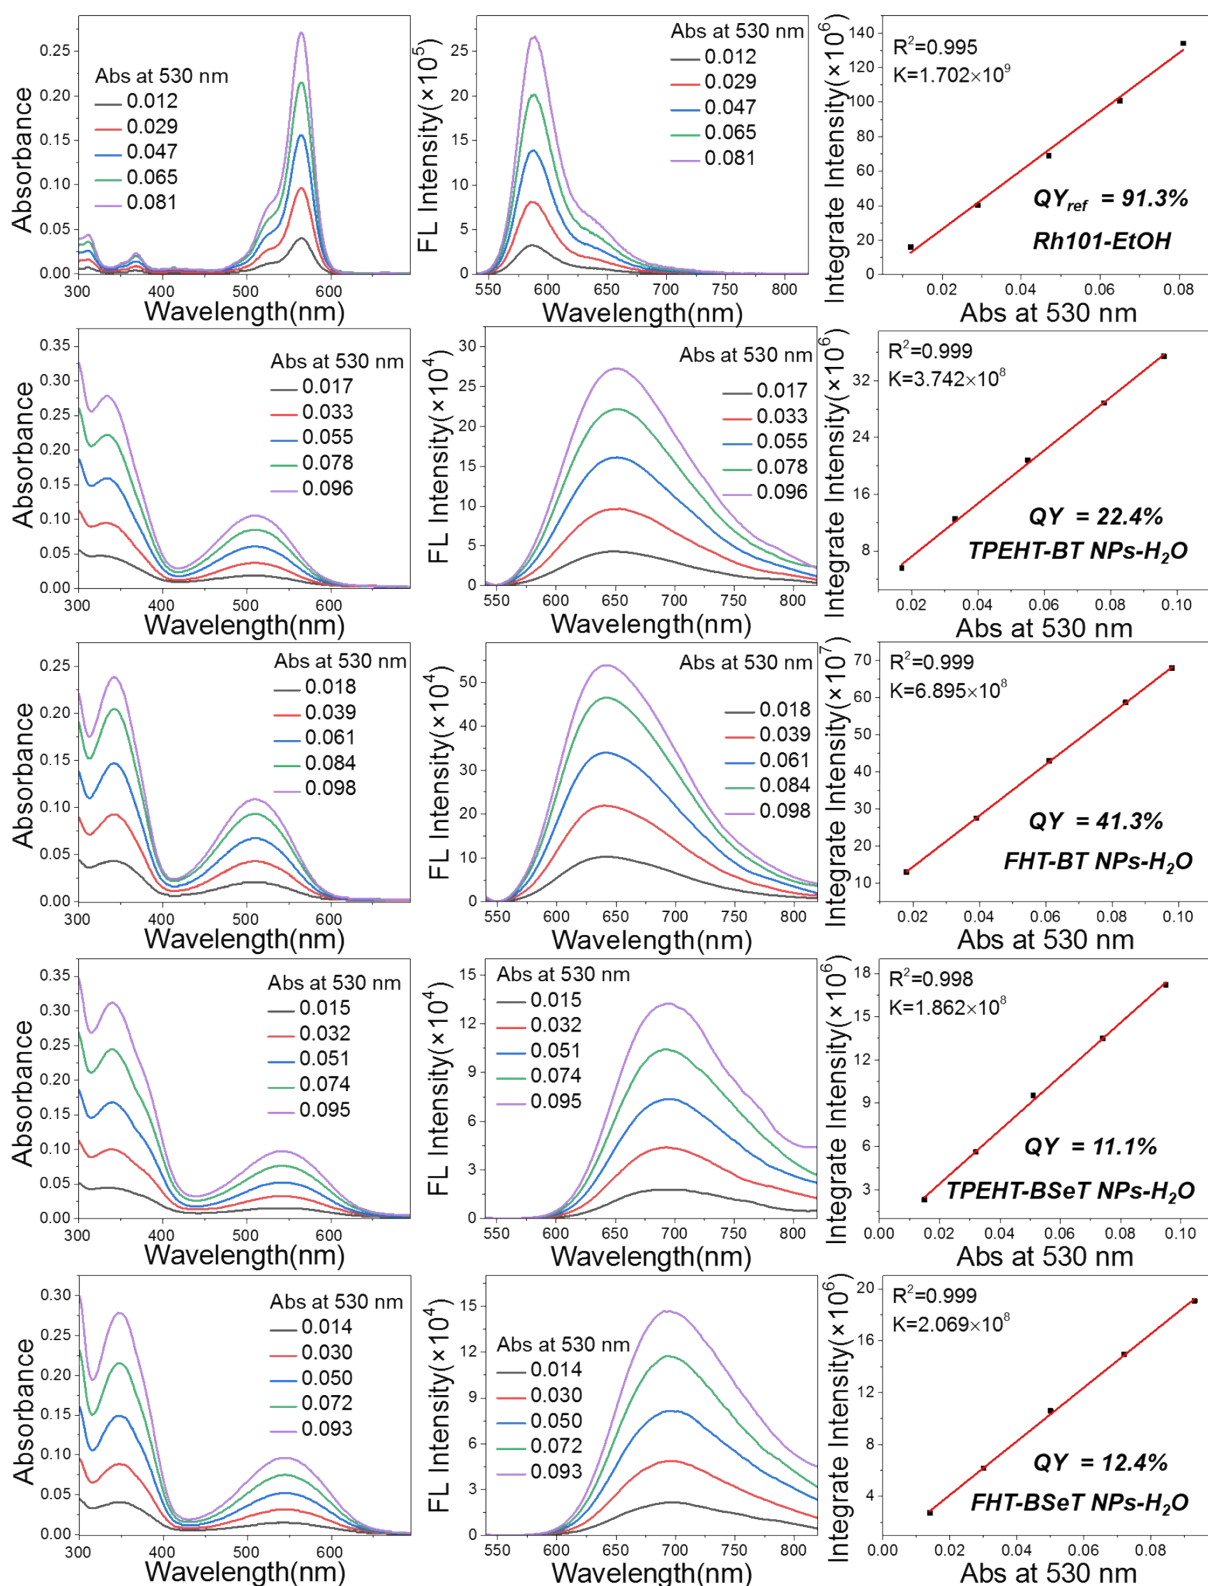

**TPEHT-BT NPs, FHT-BT NPs, TPEHT-BSeT NPs, and FHT-BSeT NPs**



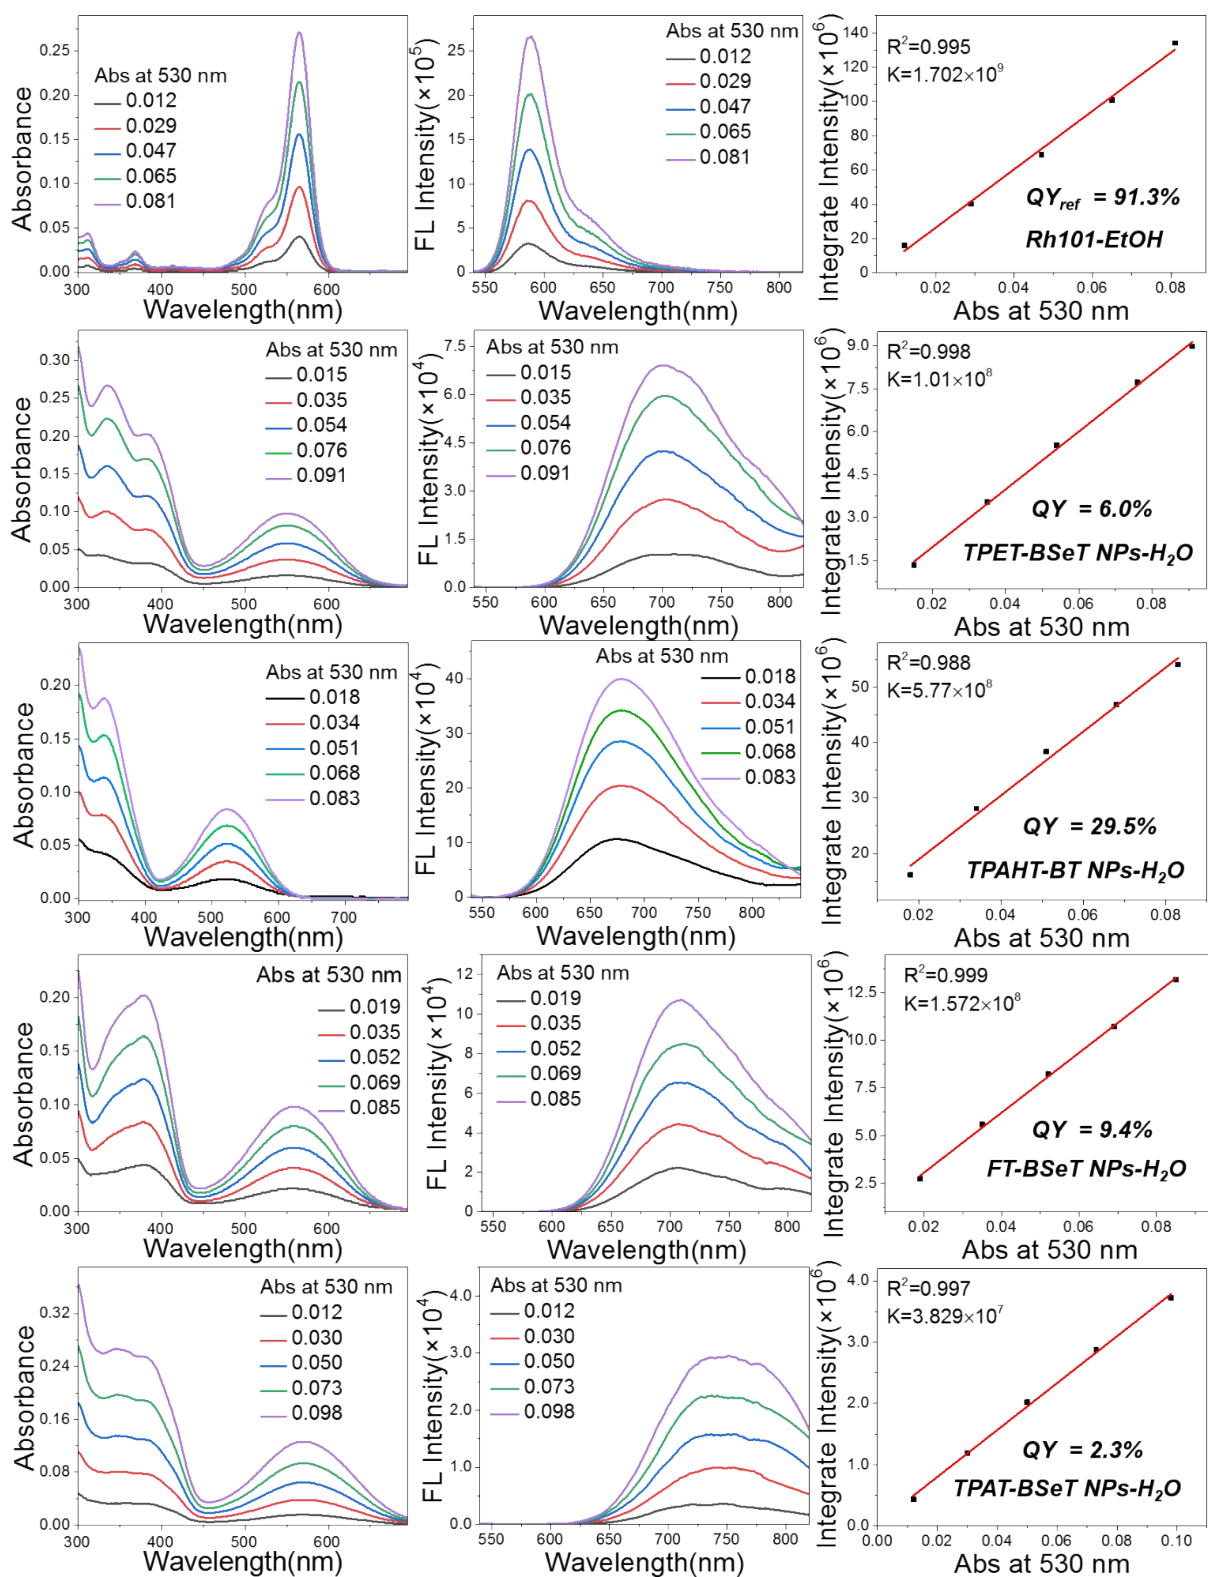

**TPET-BSeT NPs, TPAHT-BT NPs, FT-BSeT NPs, and TPAT-BSeT NPs**

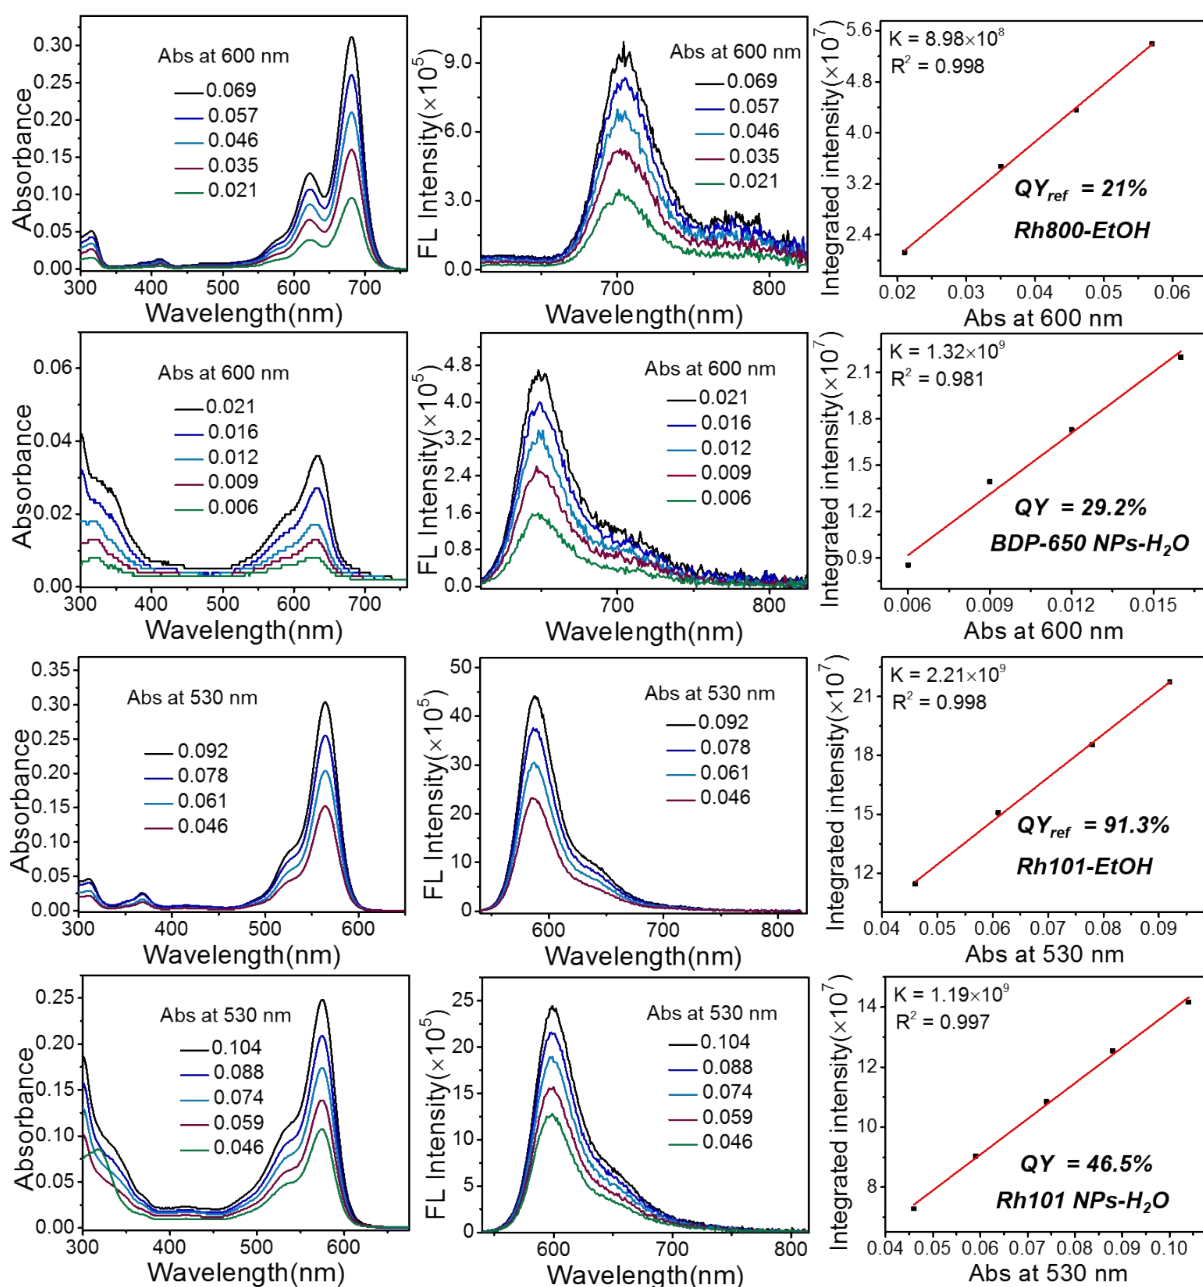

**BDP-650 NPs and Rh101 NPs**

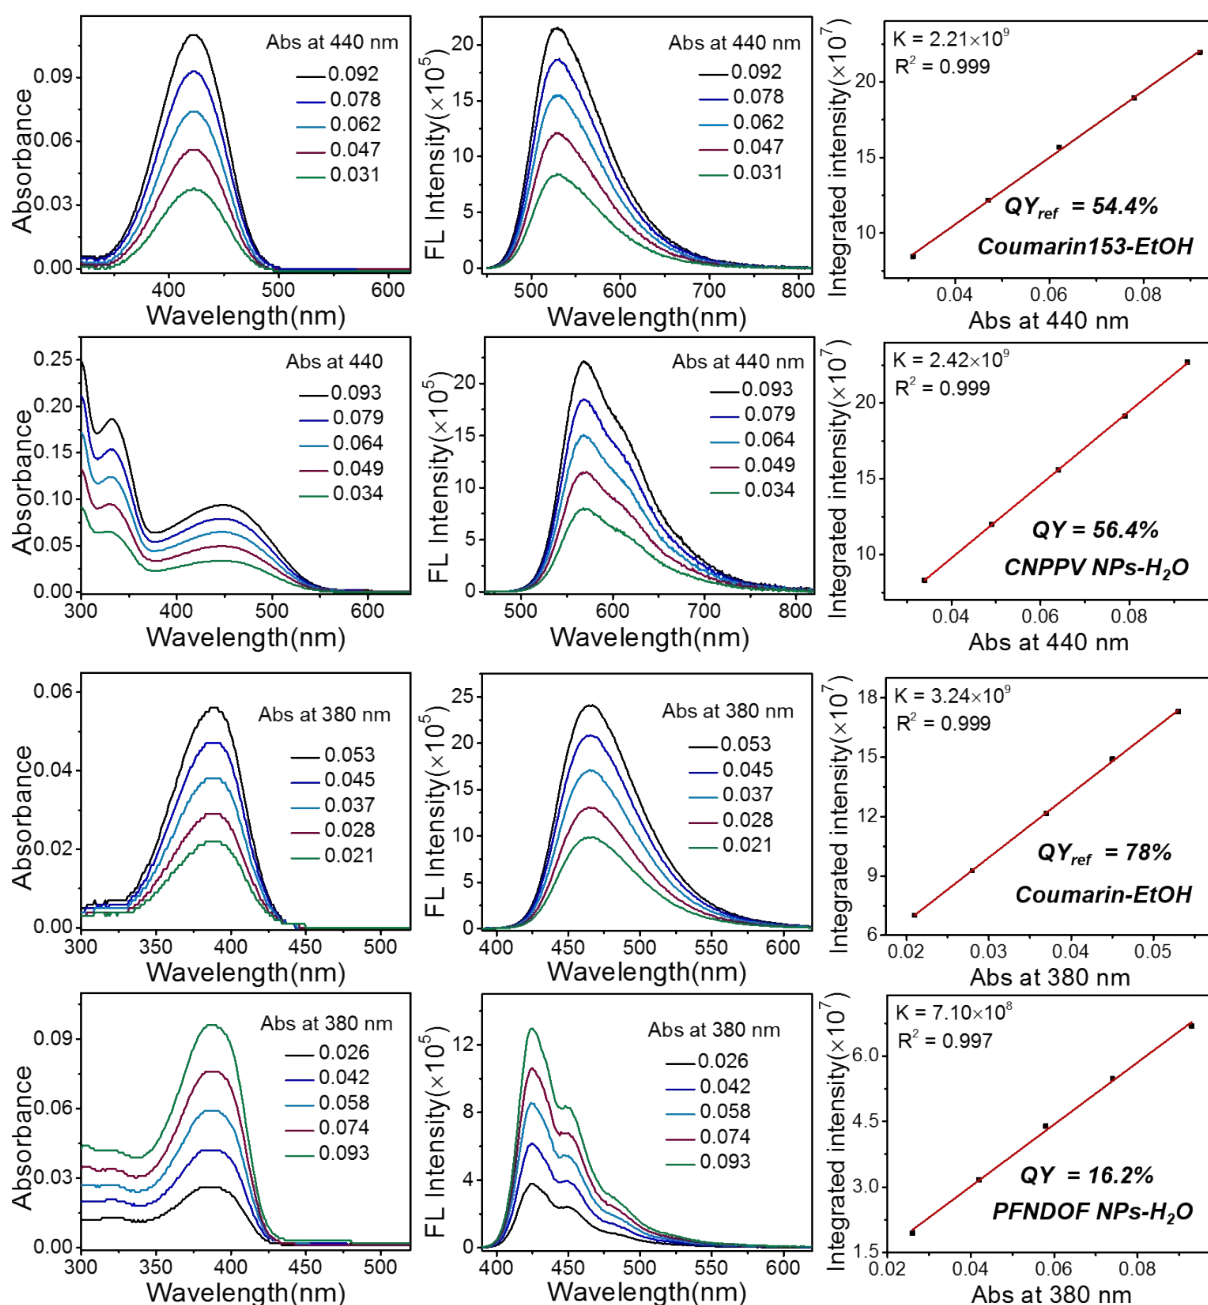

**CNPPV NPs and PFN-DOF NPs**



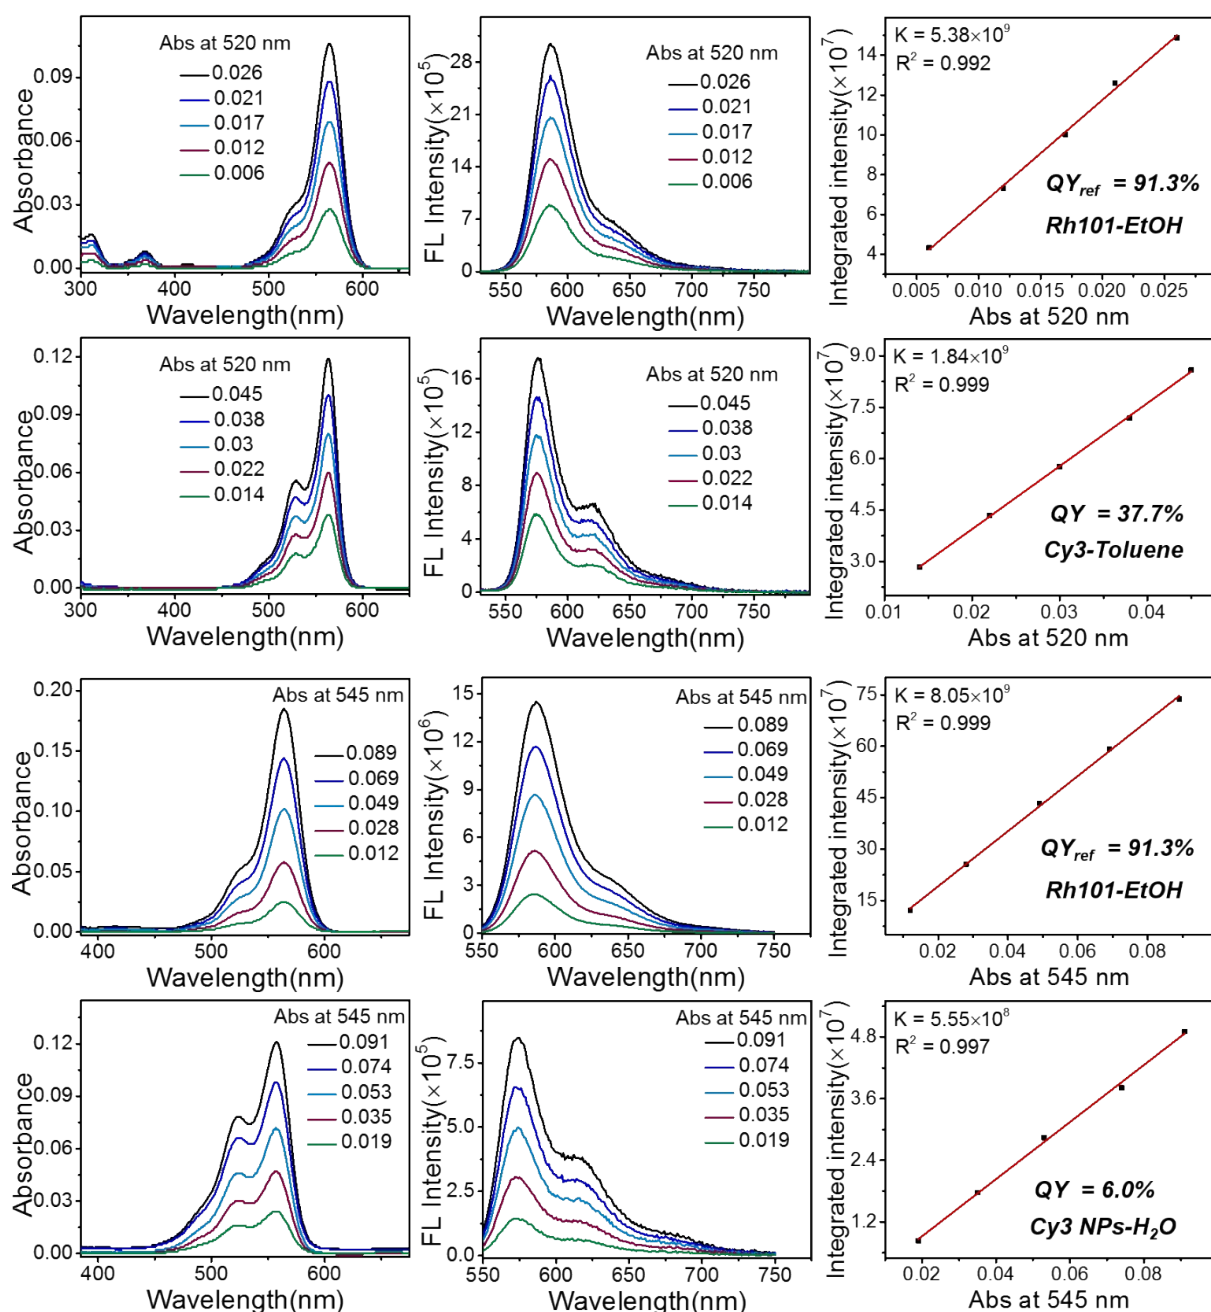

**Cy3 (in toluene) and Cy3 NPs**

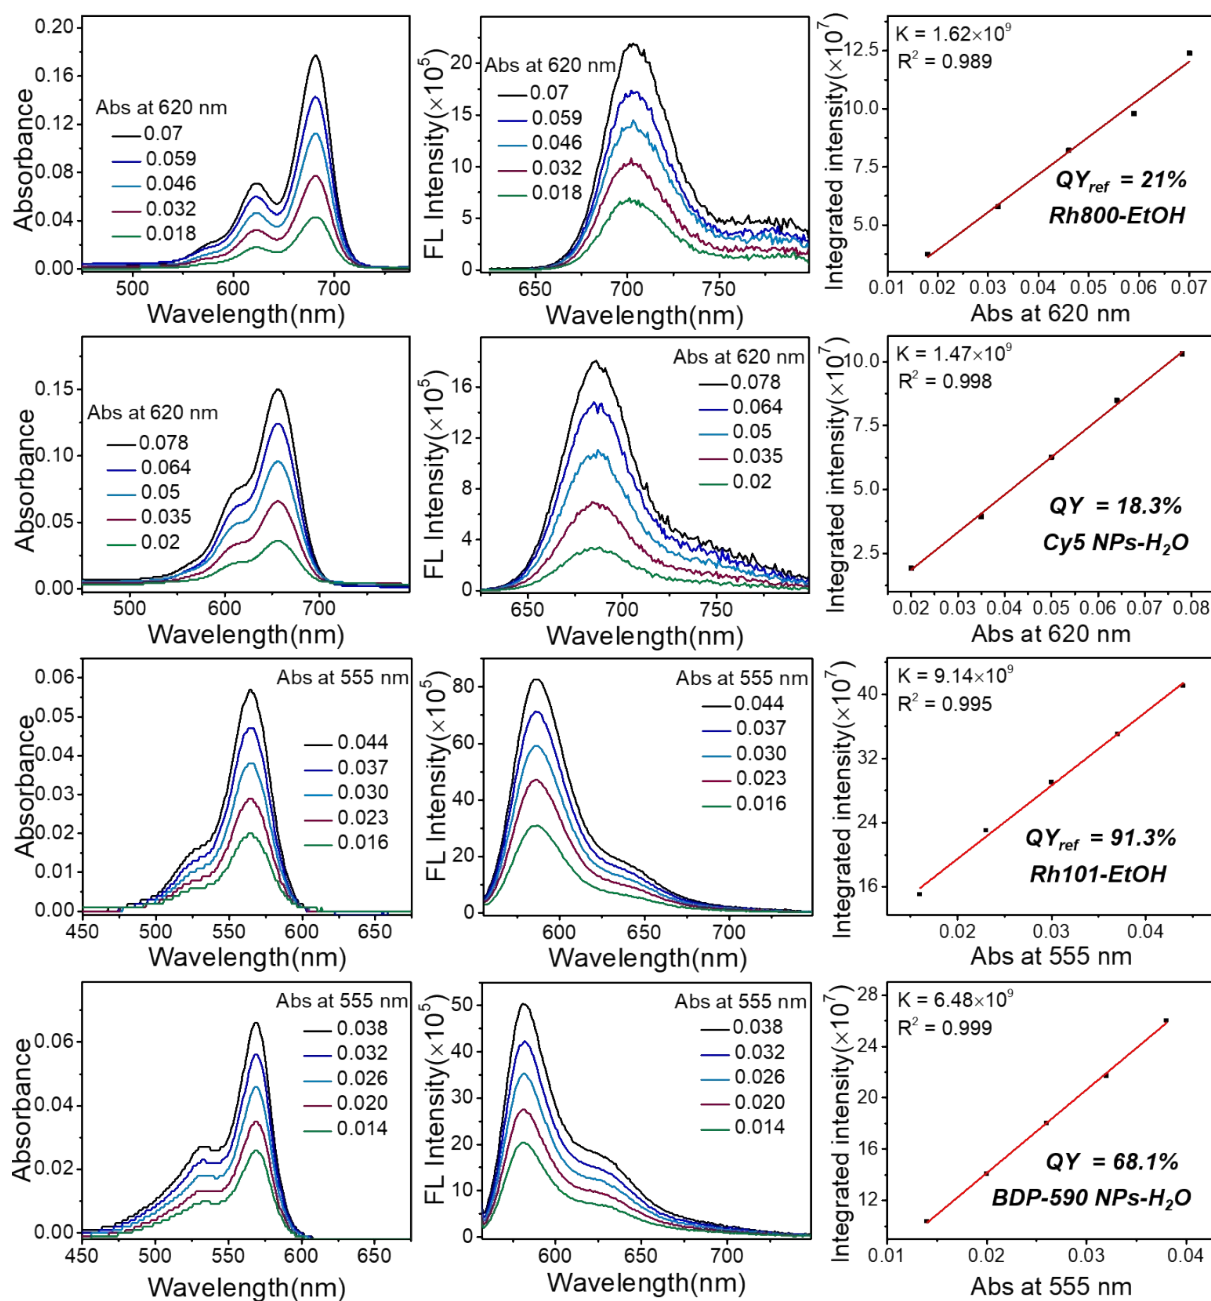

**Cy5 NPs and BDP-590 NPs**

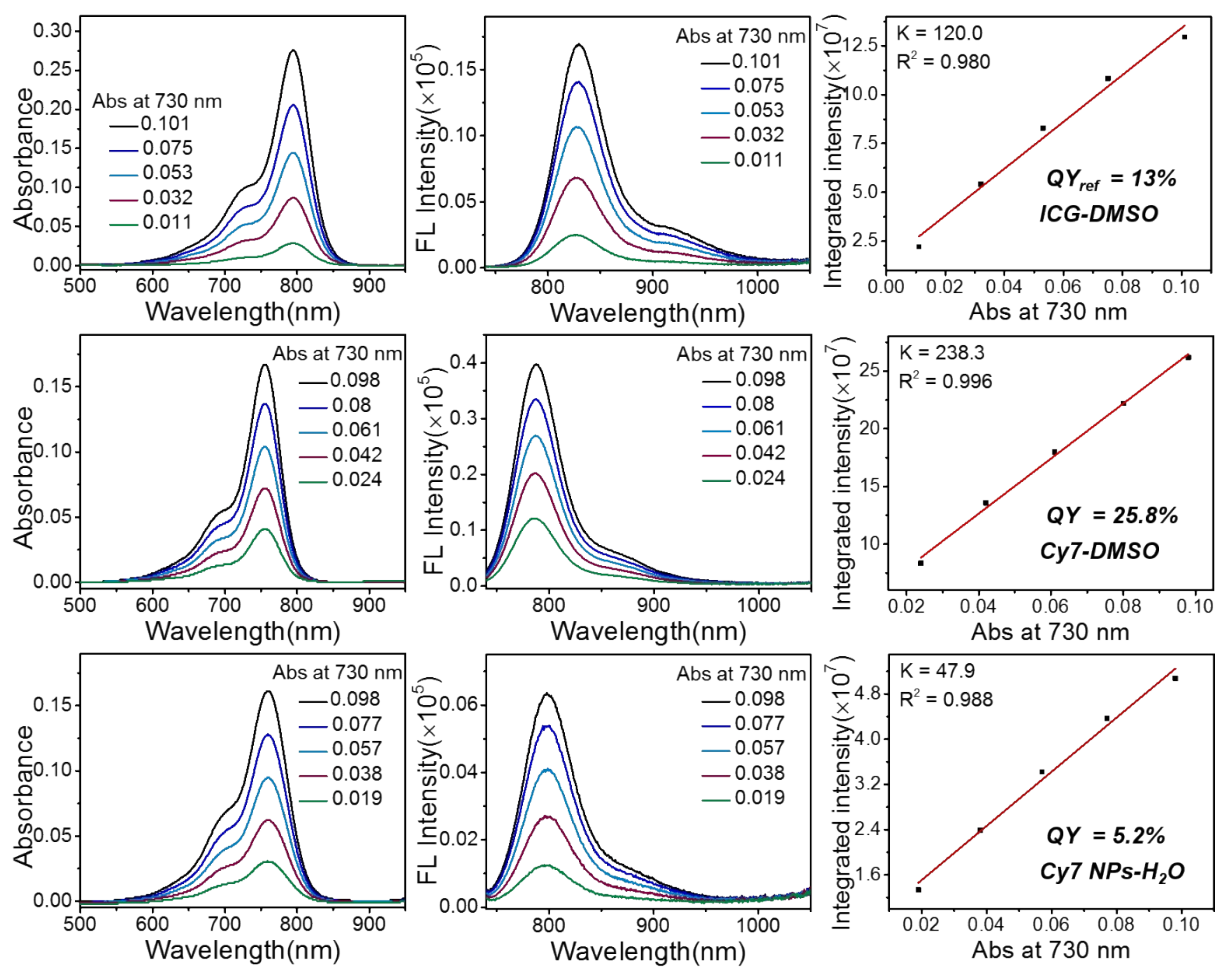

**Cy7 (in DMSO) and Cy7 NPs**

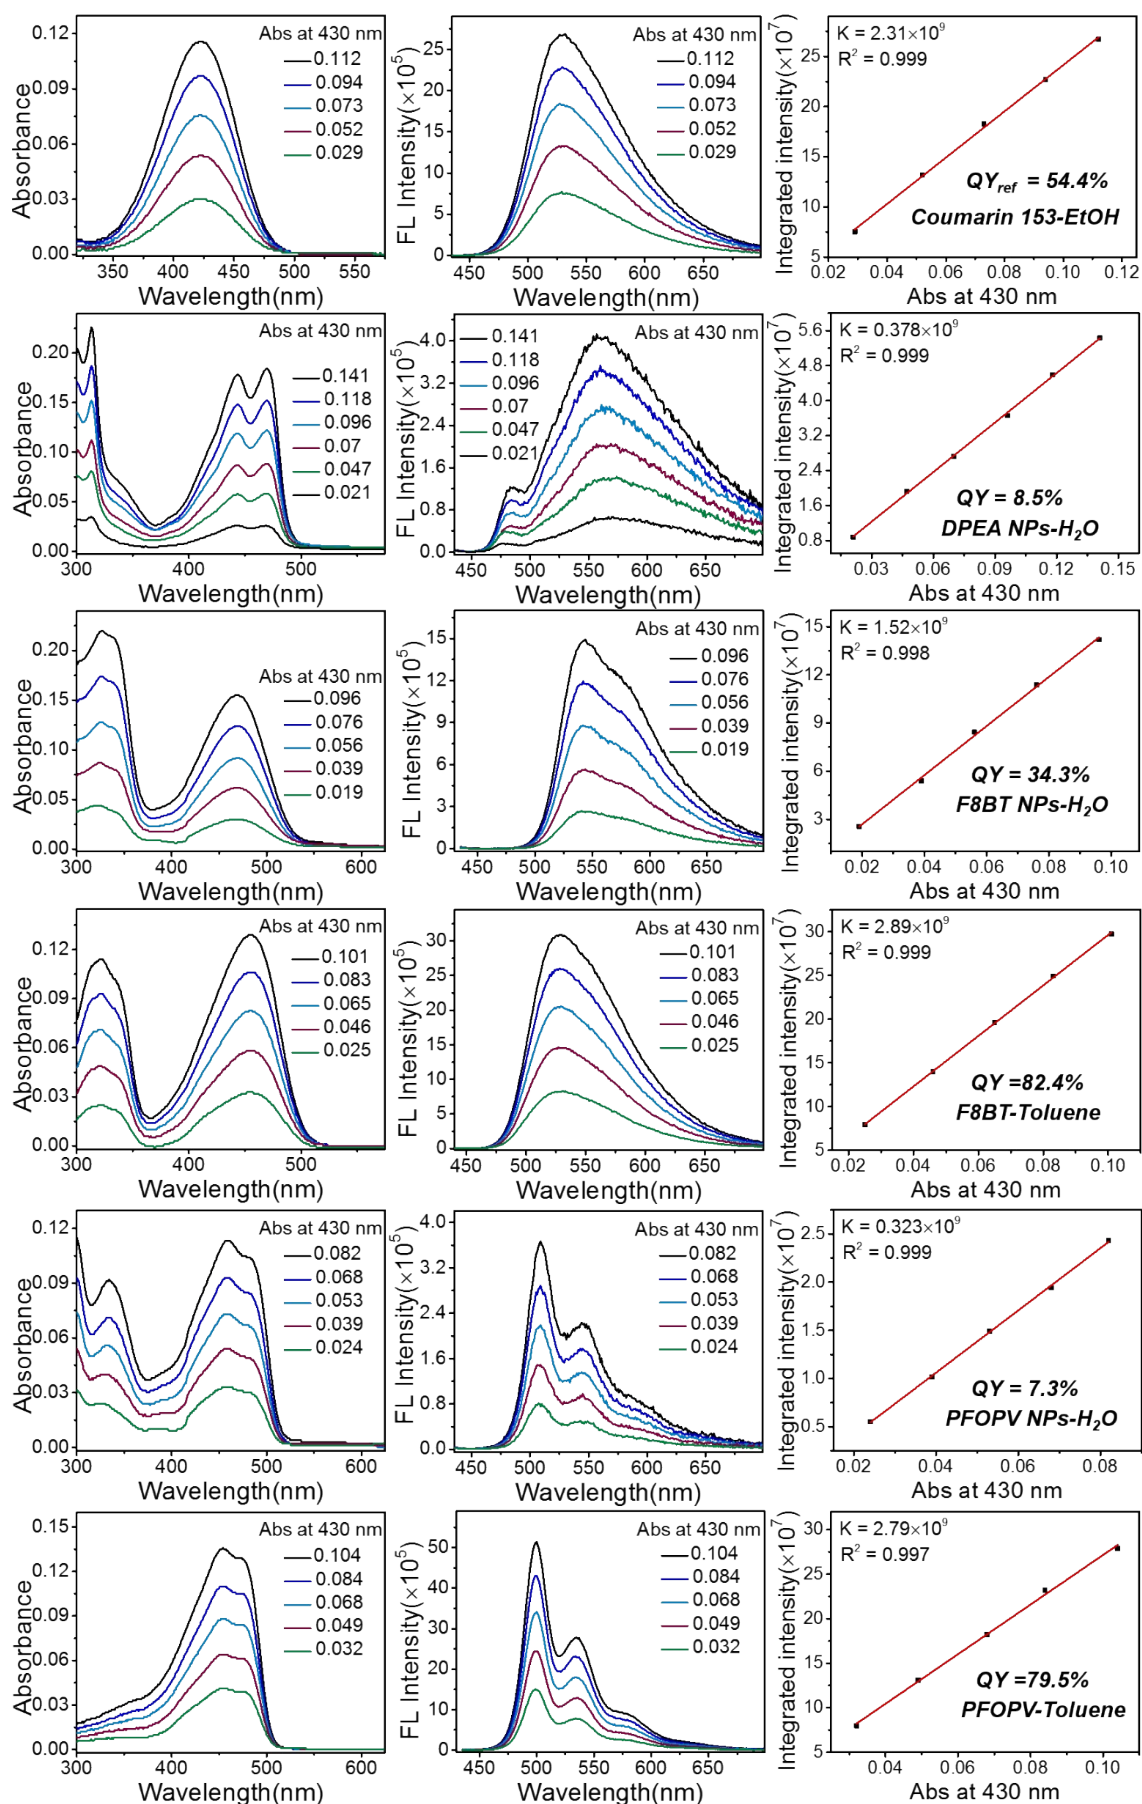

**DPEA NPs, F8BT (in toluene), F8BT NPs, PFOPV (in toluene), and PFOPV NPs**

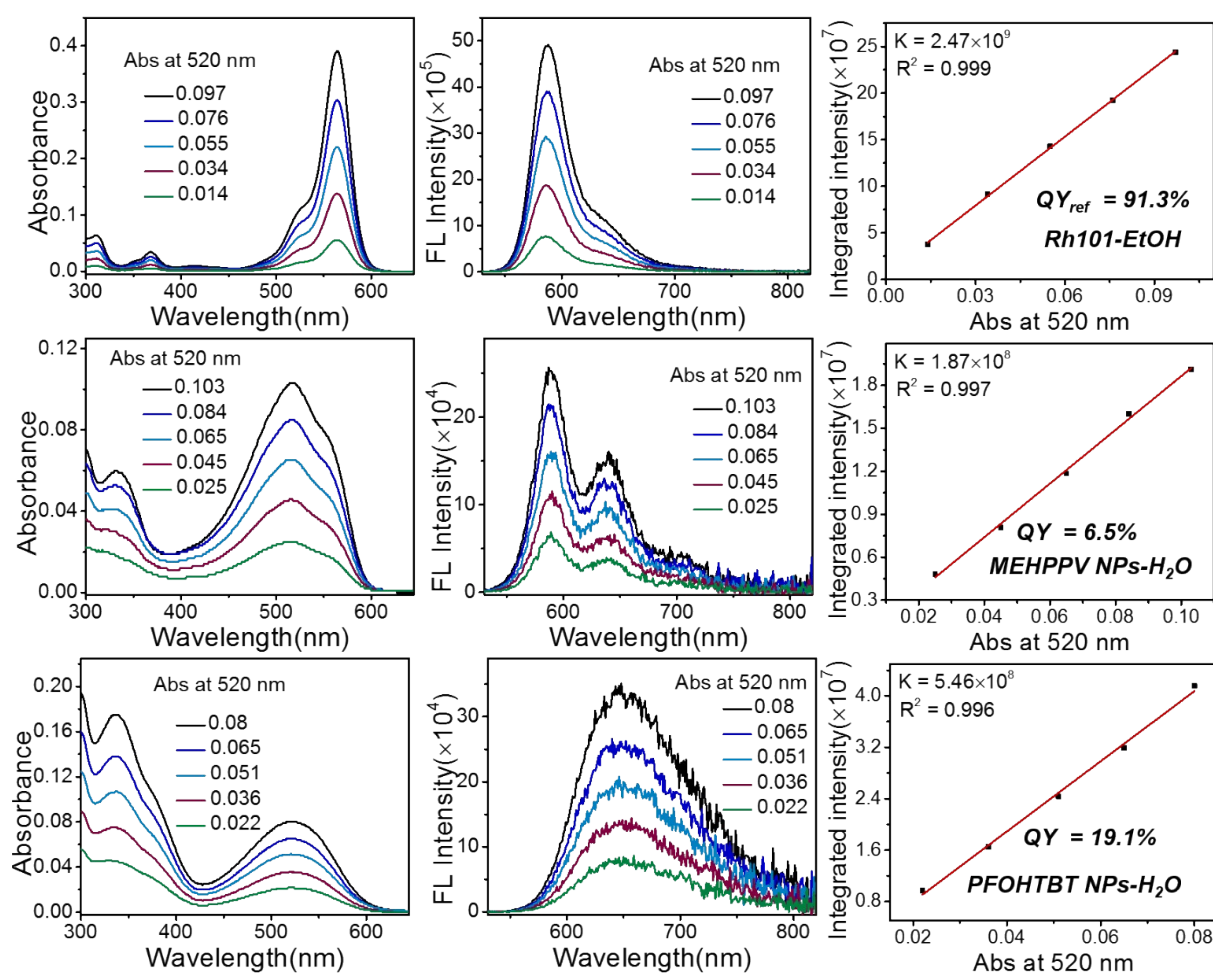

**MEHPPV NPs and PFOHTBT NPs**



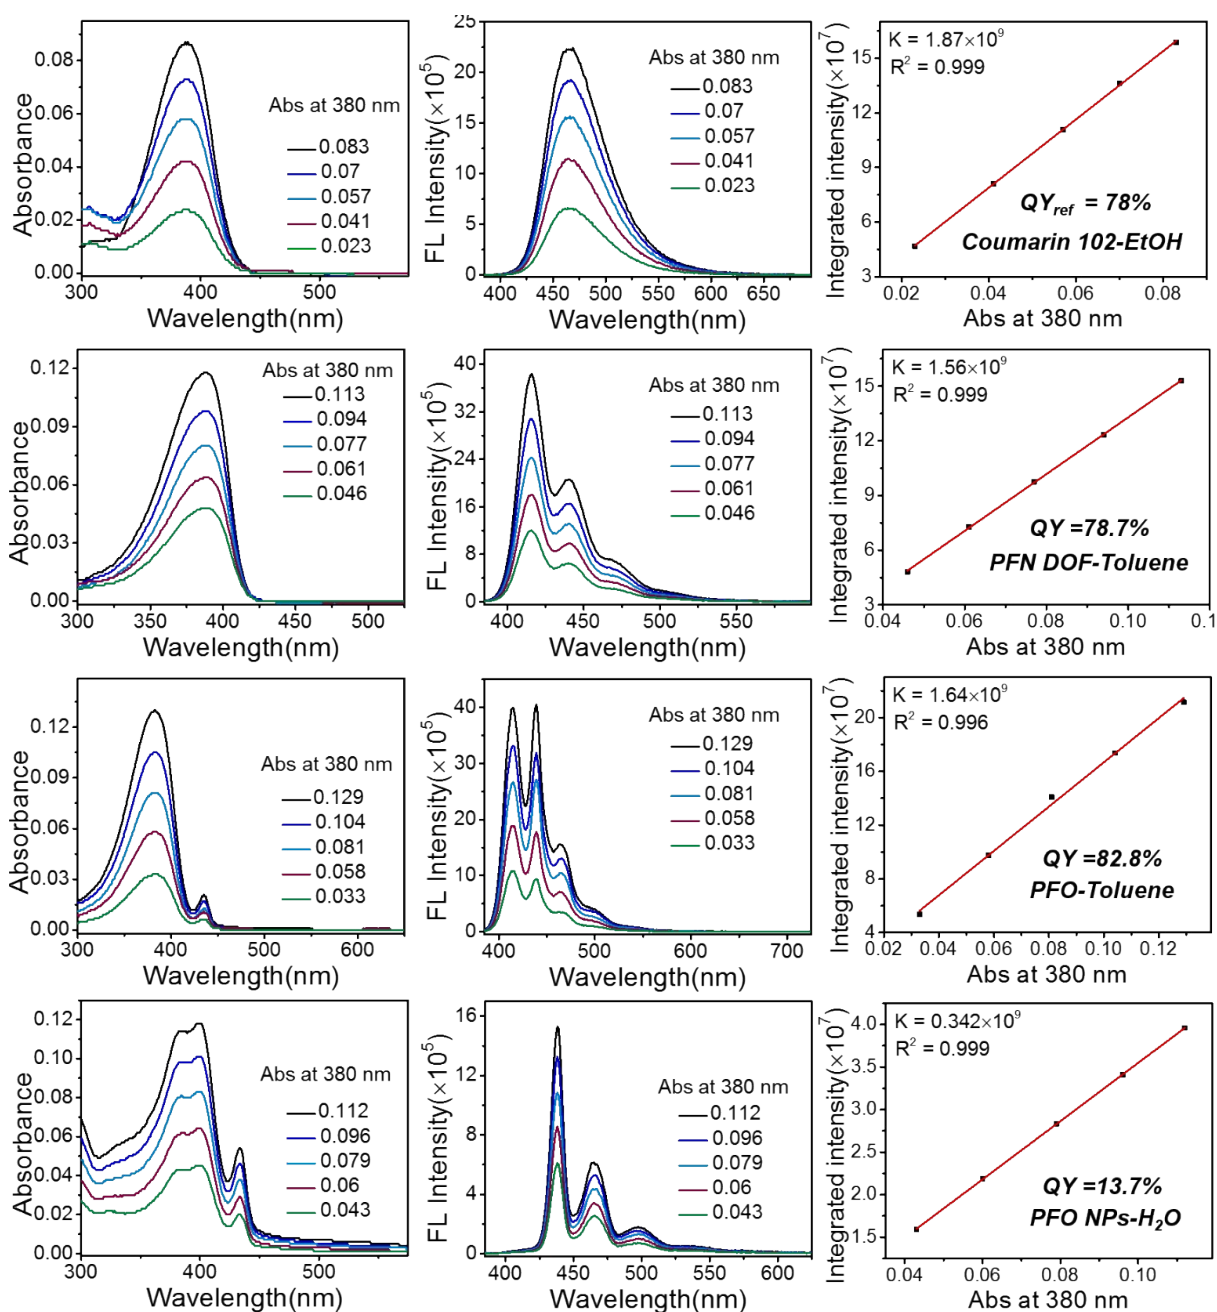

**PFN-DOF (in toluene), PFO (in toluene), and PFO NPs**

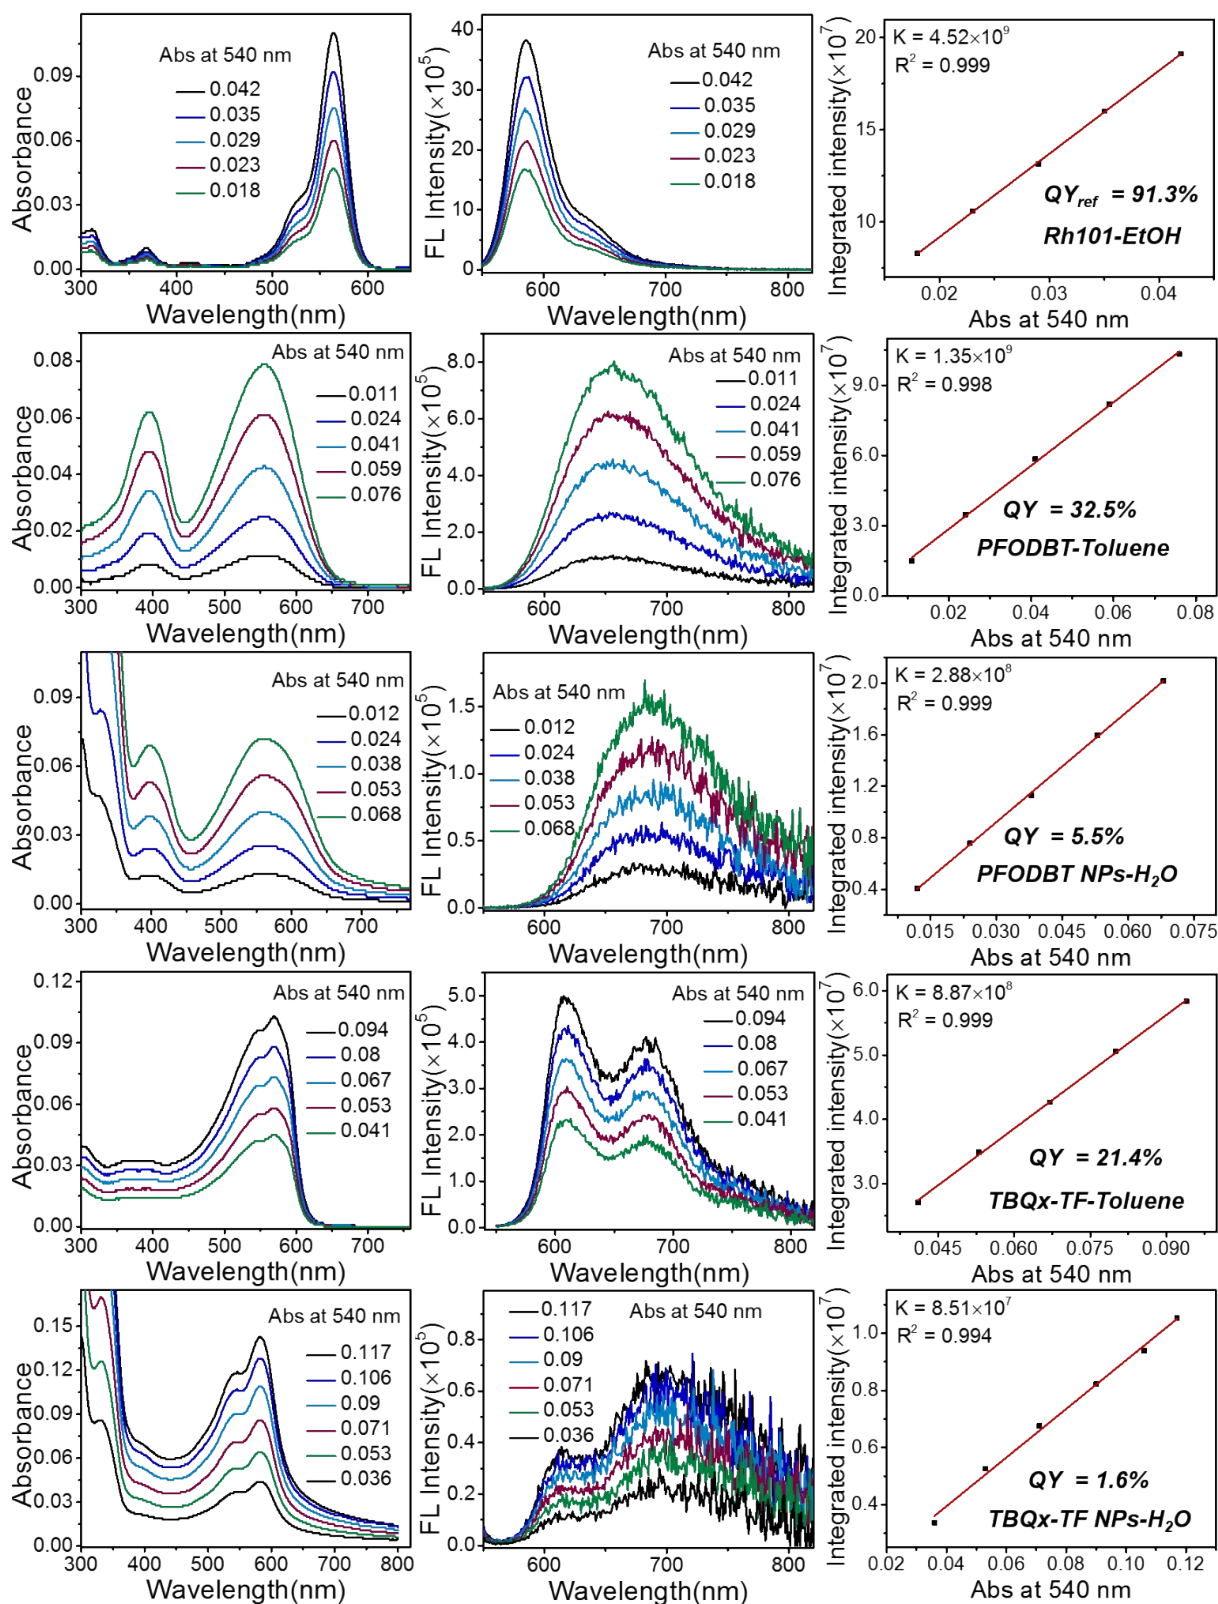

**PFODBT (in toluene), PFODBT NPs, TBQx-TF (in toluene), and TBQx-TF NPs**

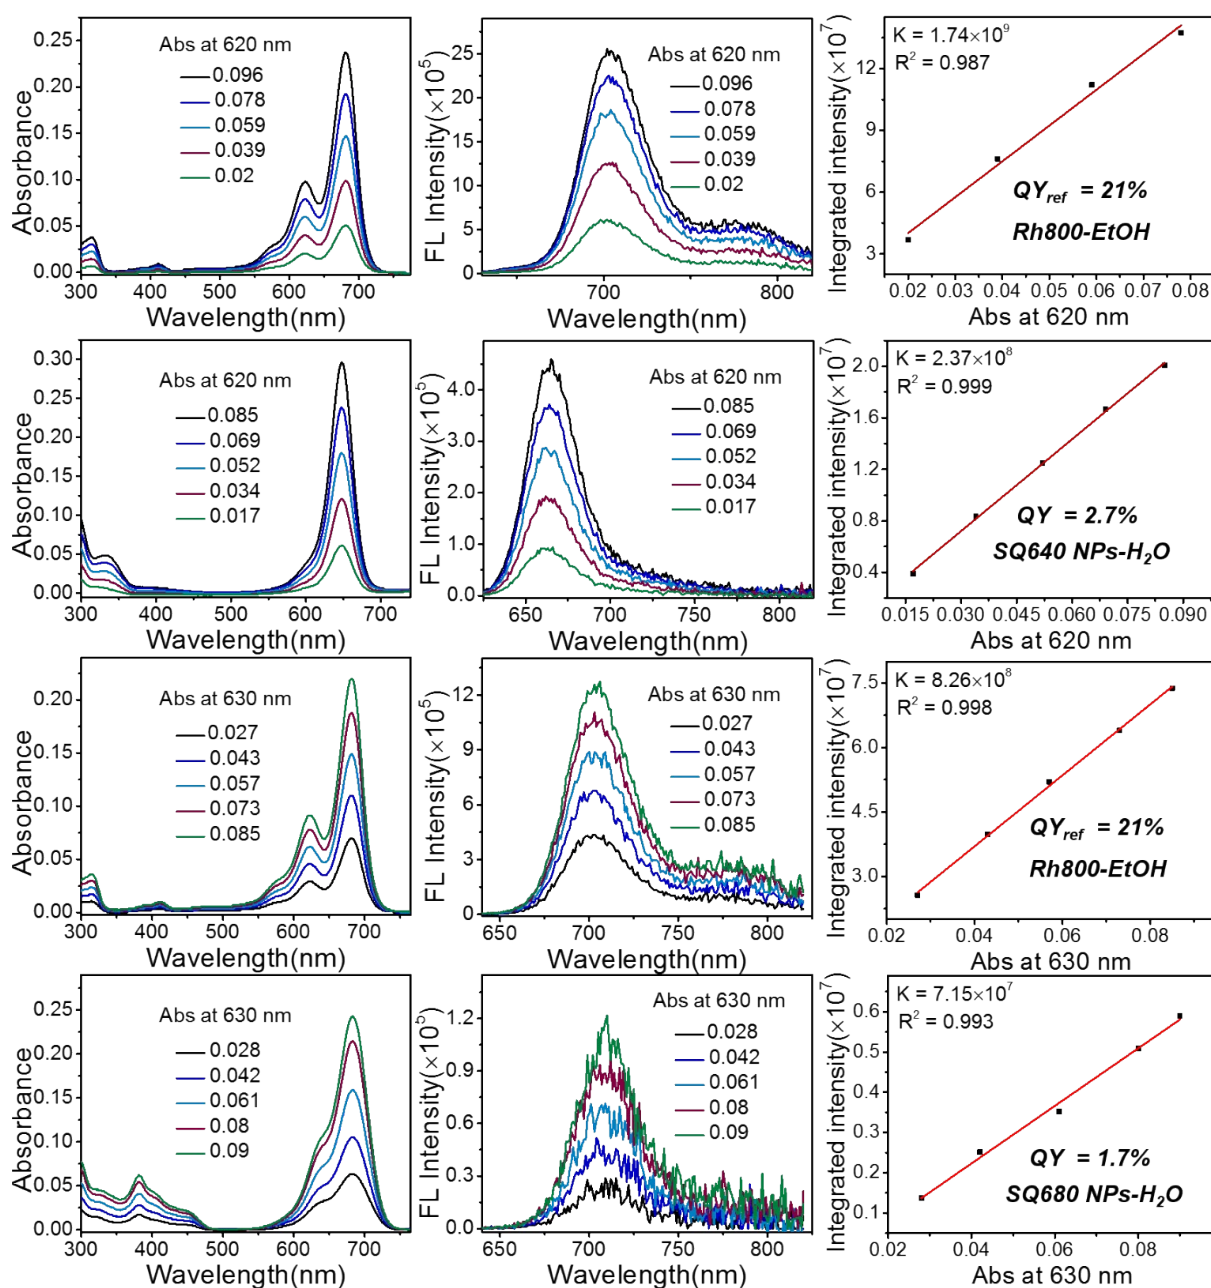

**SQ640 NPs and SQ680 NPs**



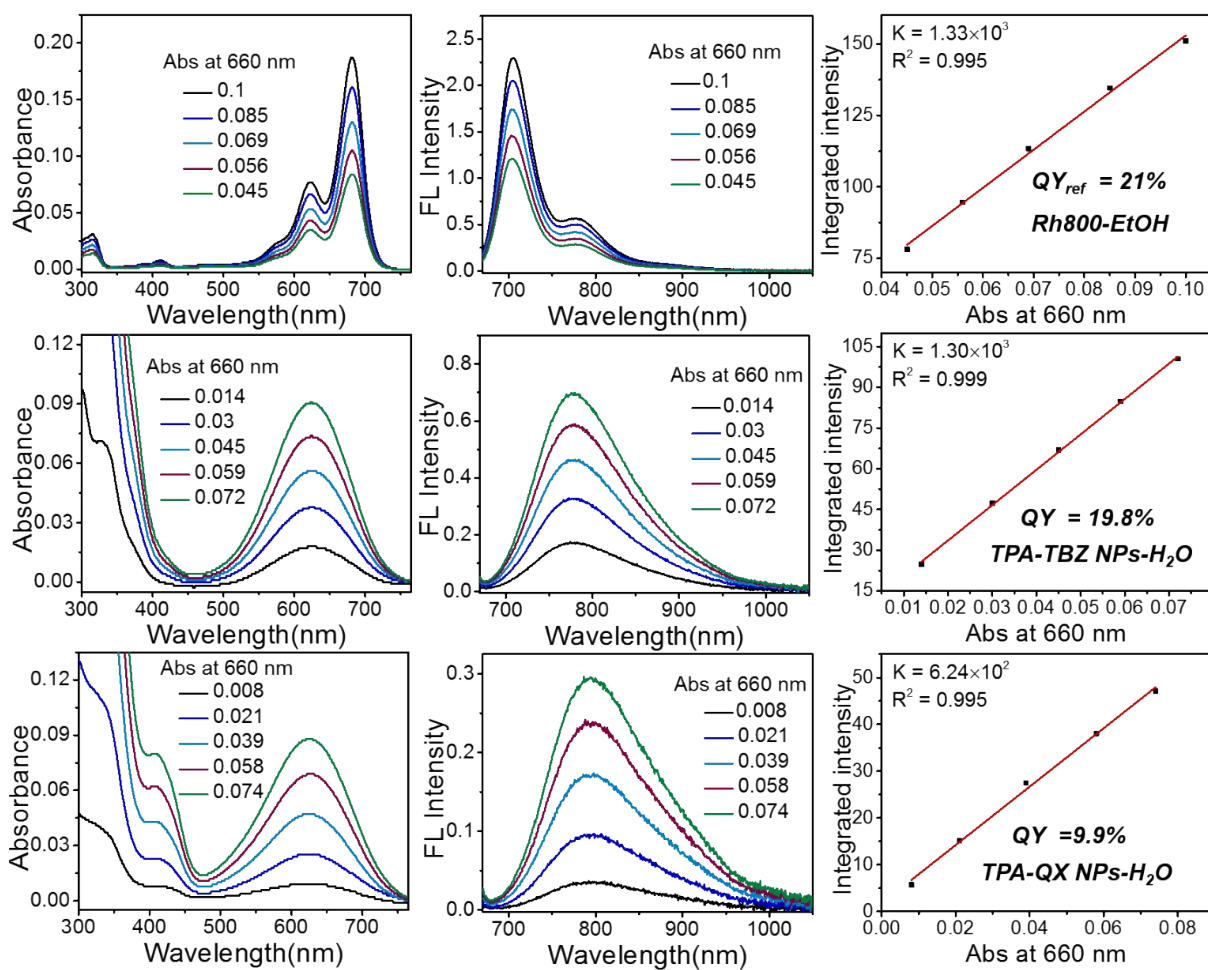

**TPA-TBZ NPs and TPA-QX NPs**

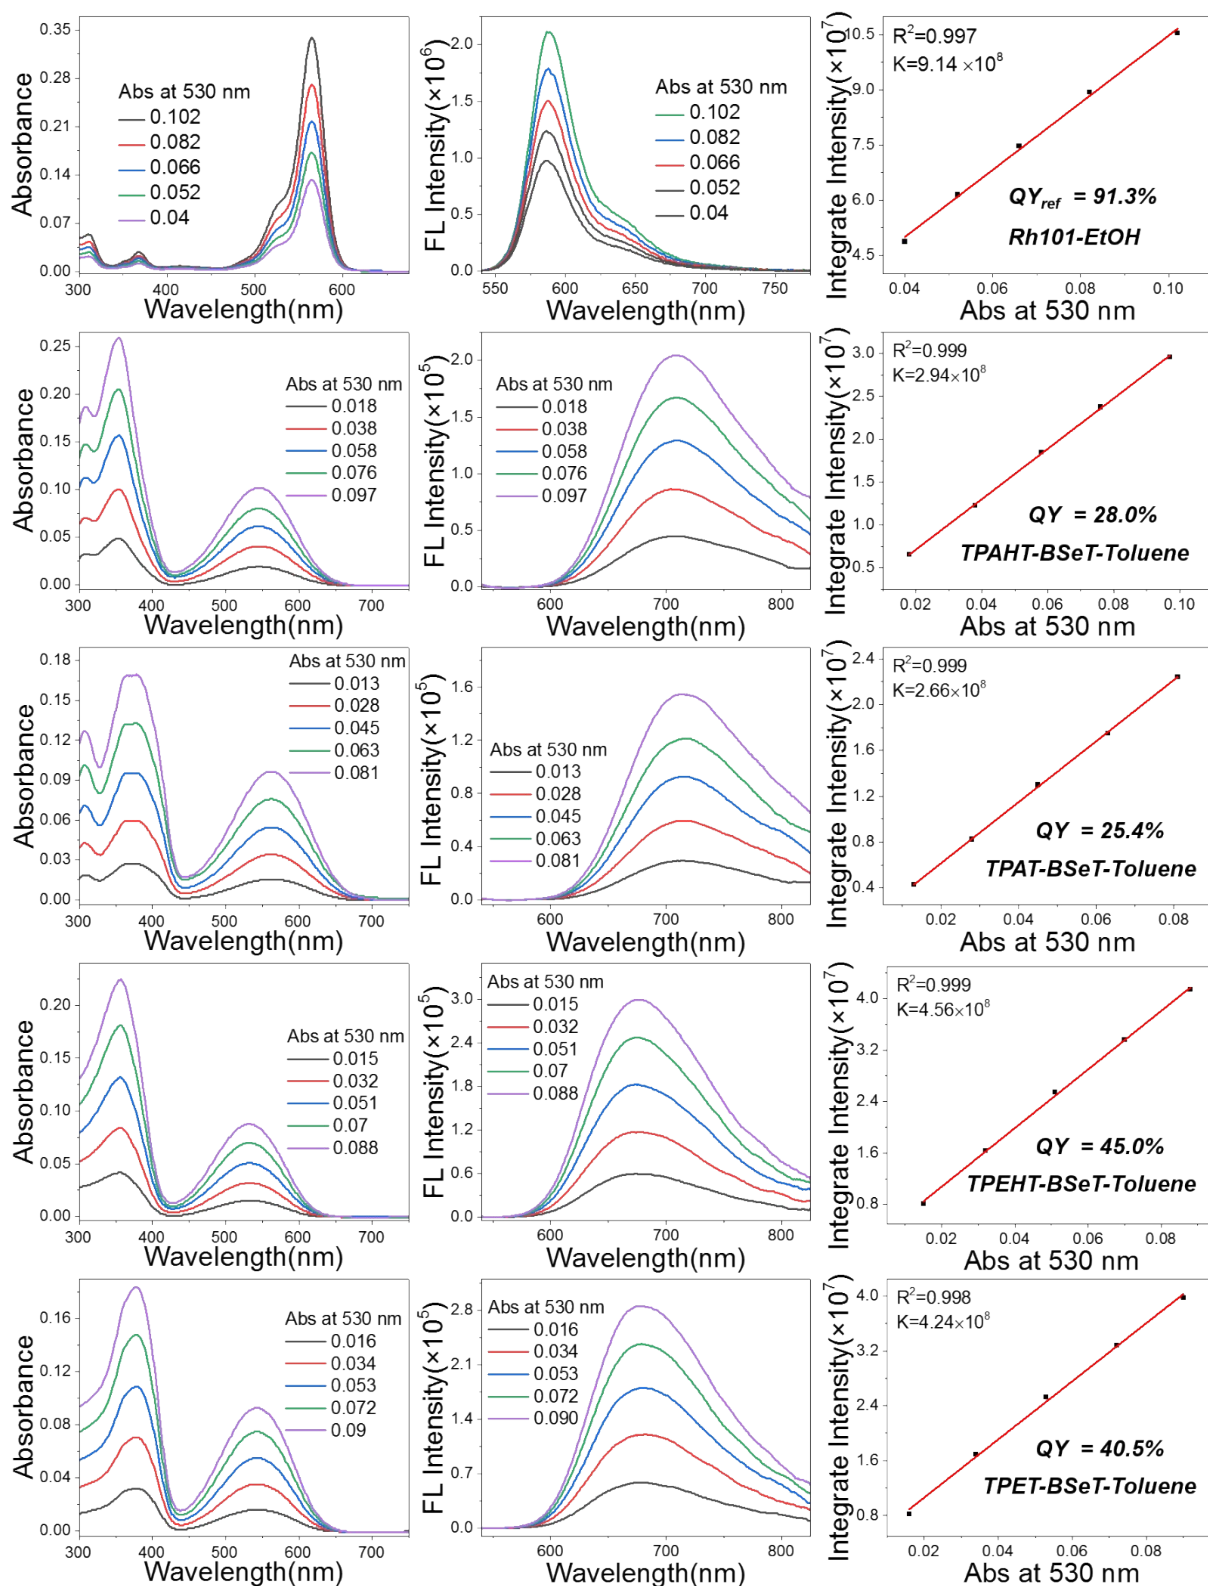

TPAHT-BseT, TPAT-BseT, TPEHT-BseT, and TPET-BseT, in toluene



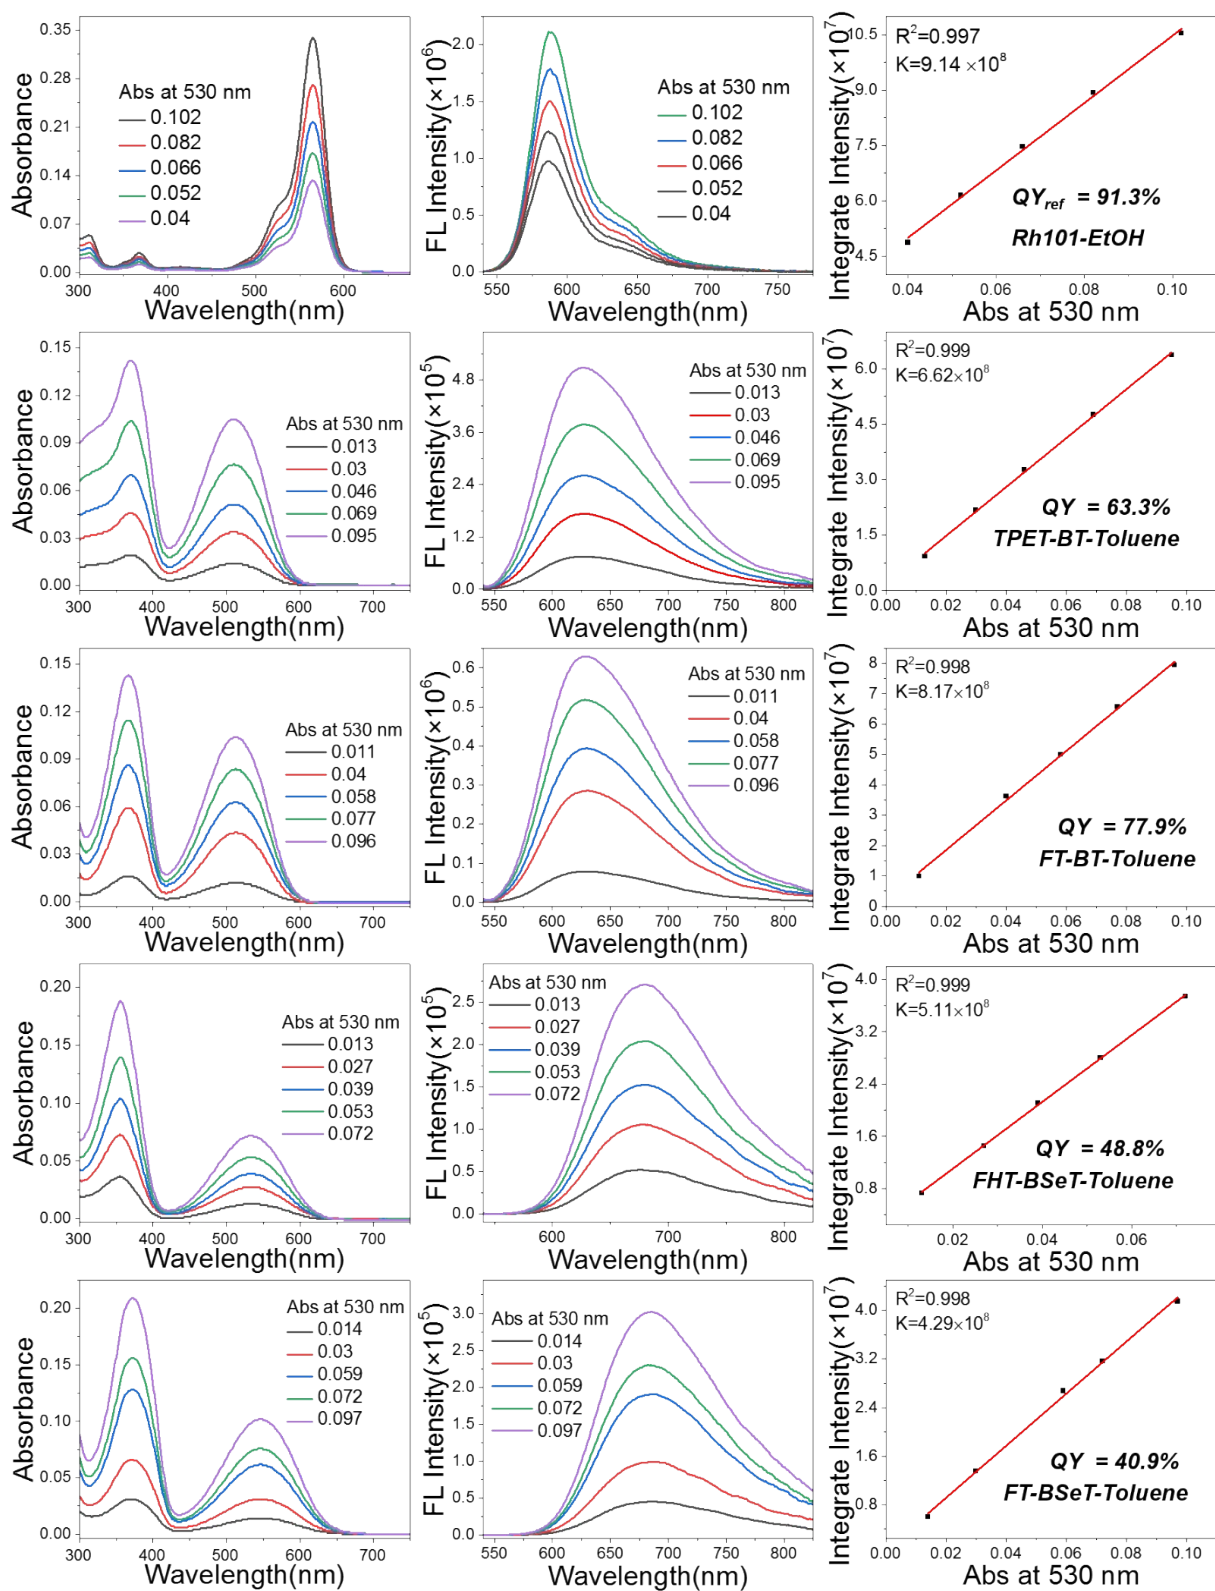

TPET-BT, FT-BT, FHT-BseT, and FT-BSeT, in toluene

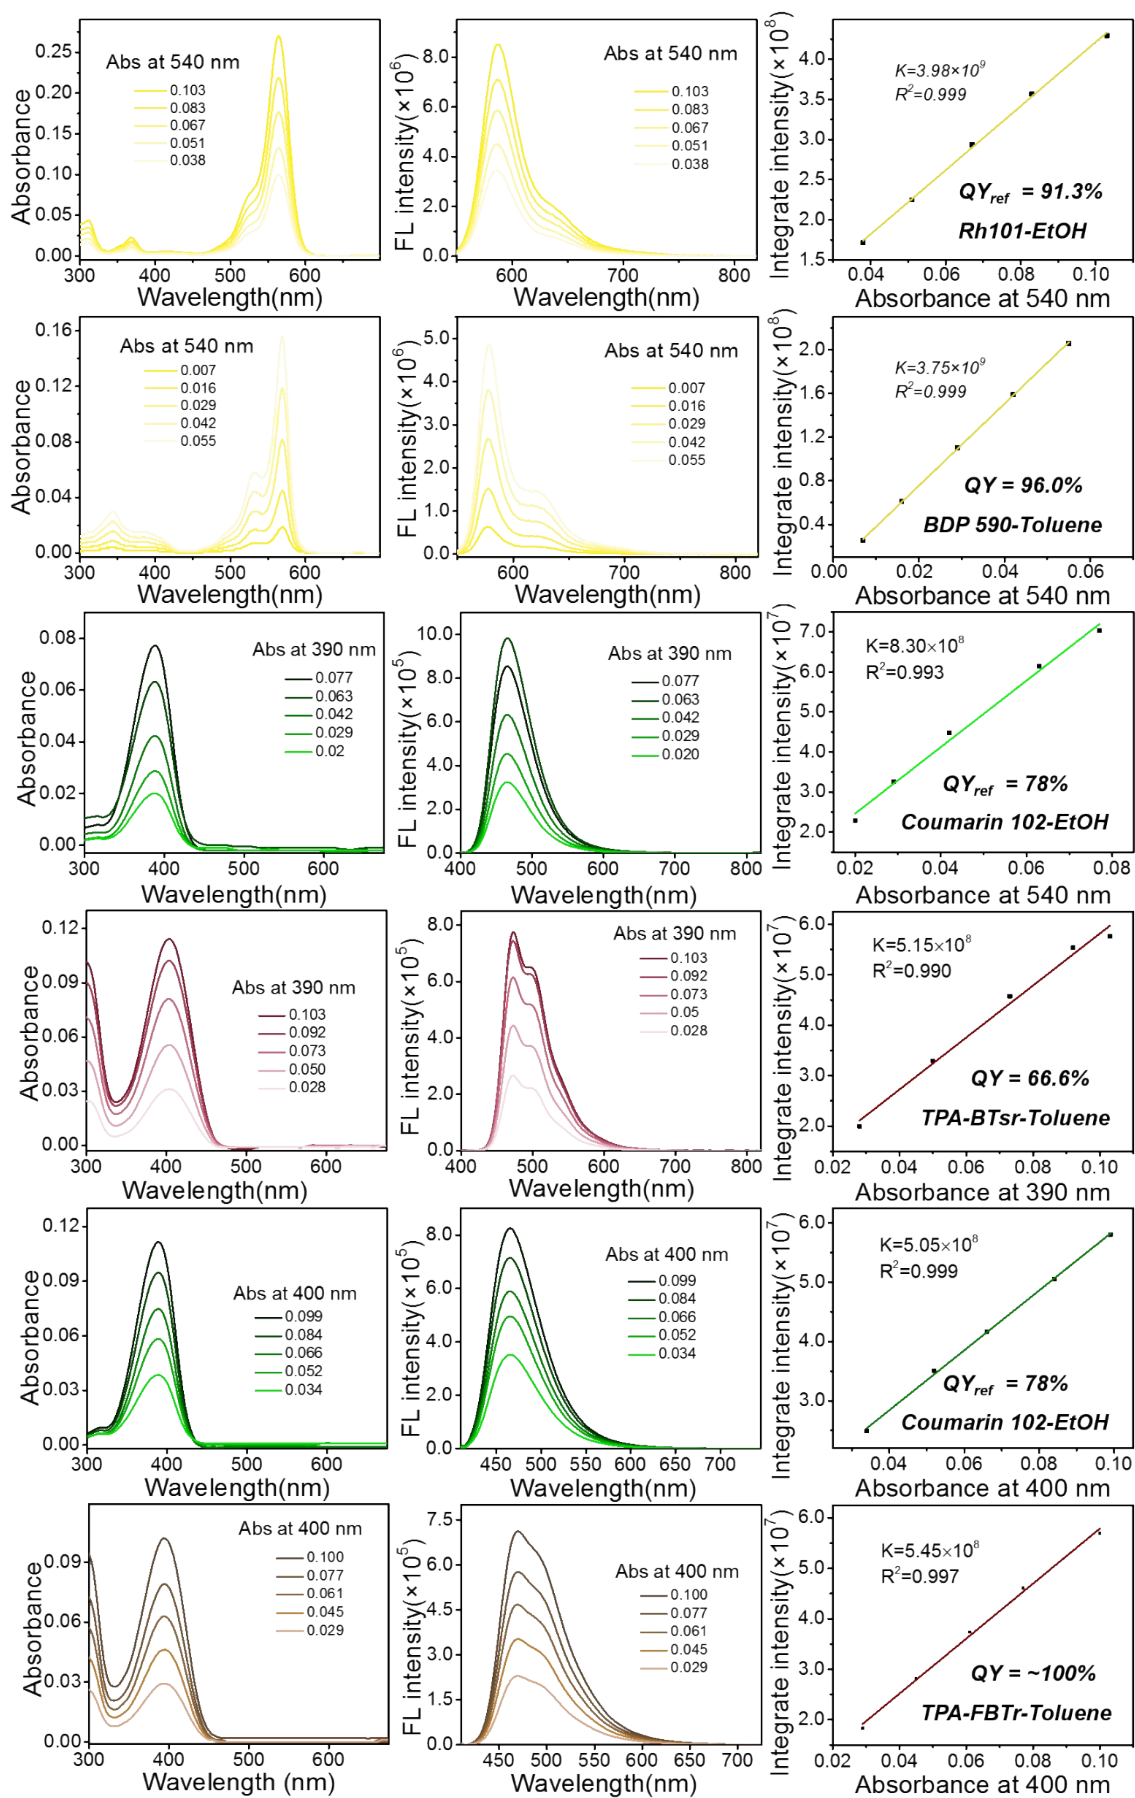

BDP-590, TPA-BTsr, and TPA-FBTr, in toluene



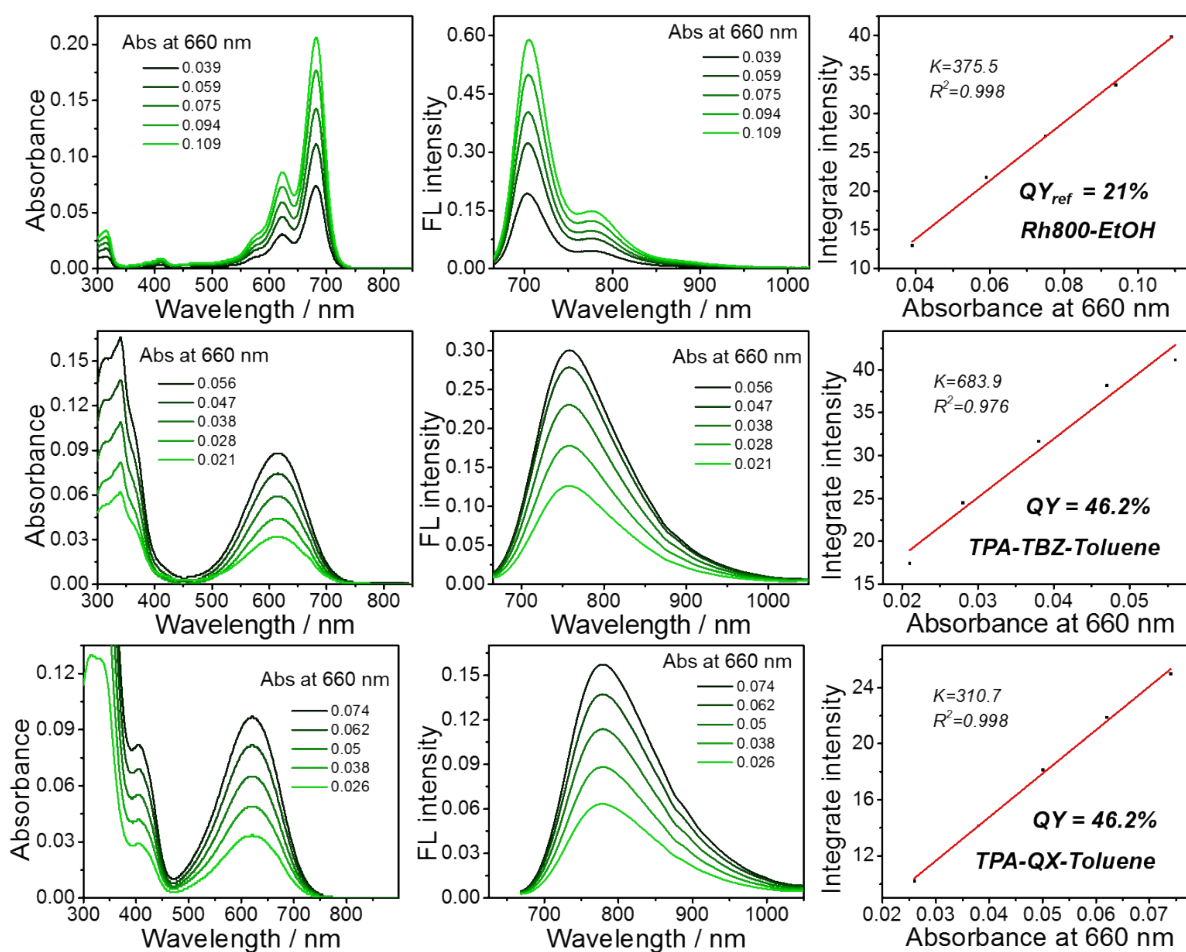

**TPA-TBZ and TPA-QX, in toluene**

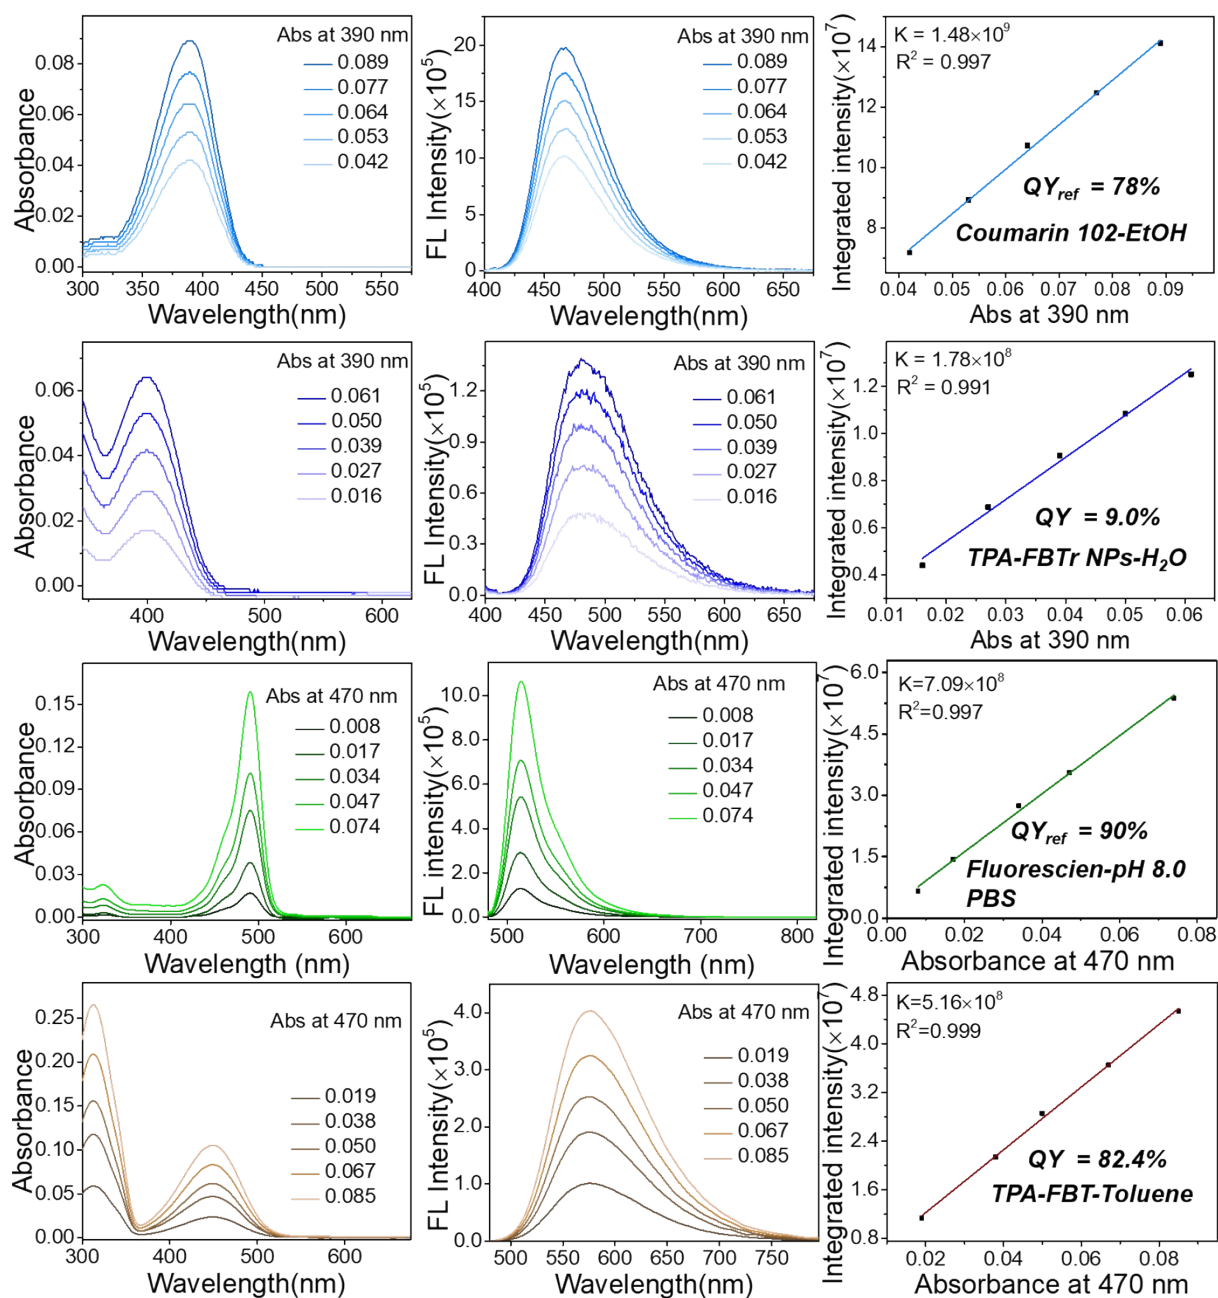

TPA-FBTr NPs (in H<sub>2</sub>O) and TPA-FBT (in toluene)

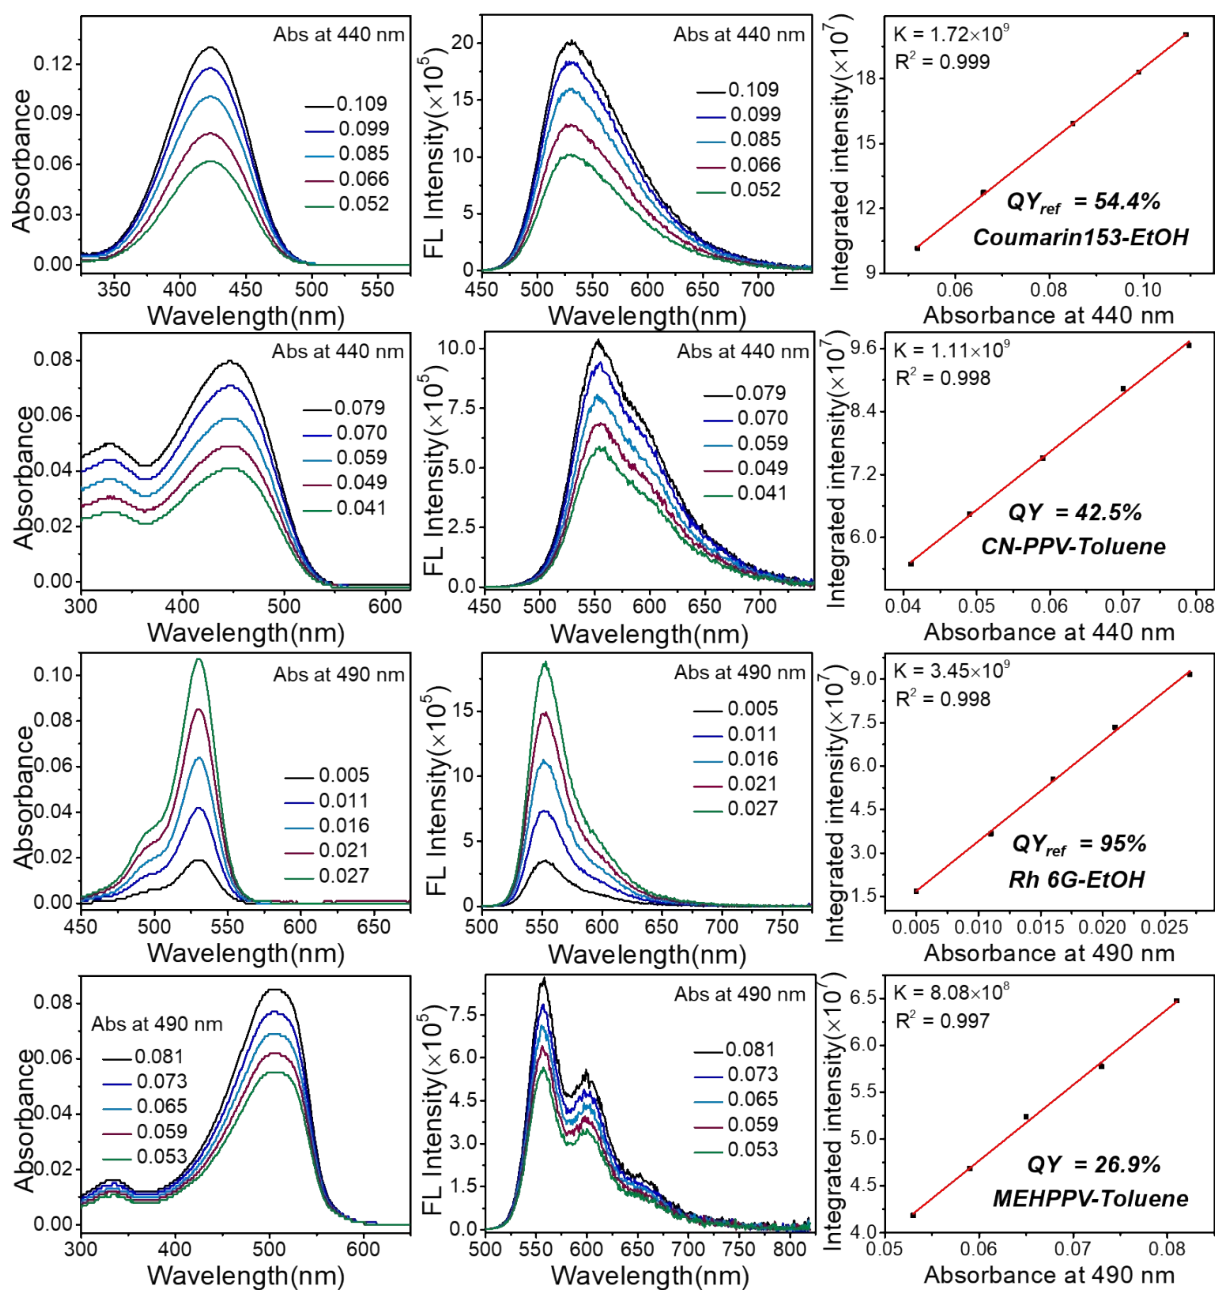

**CNPPV and MENPPV, in toluene**



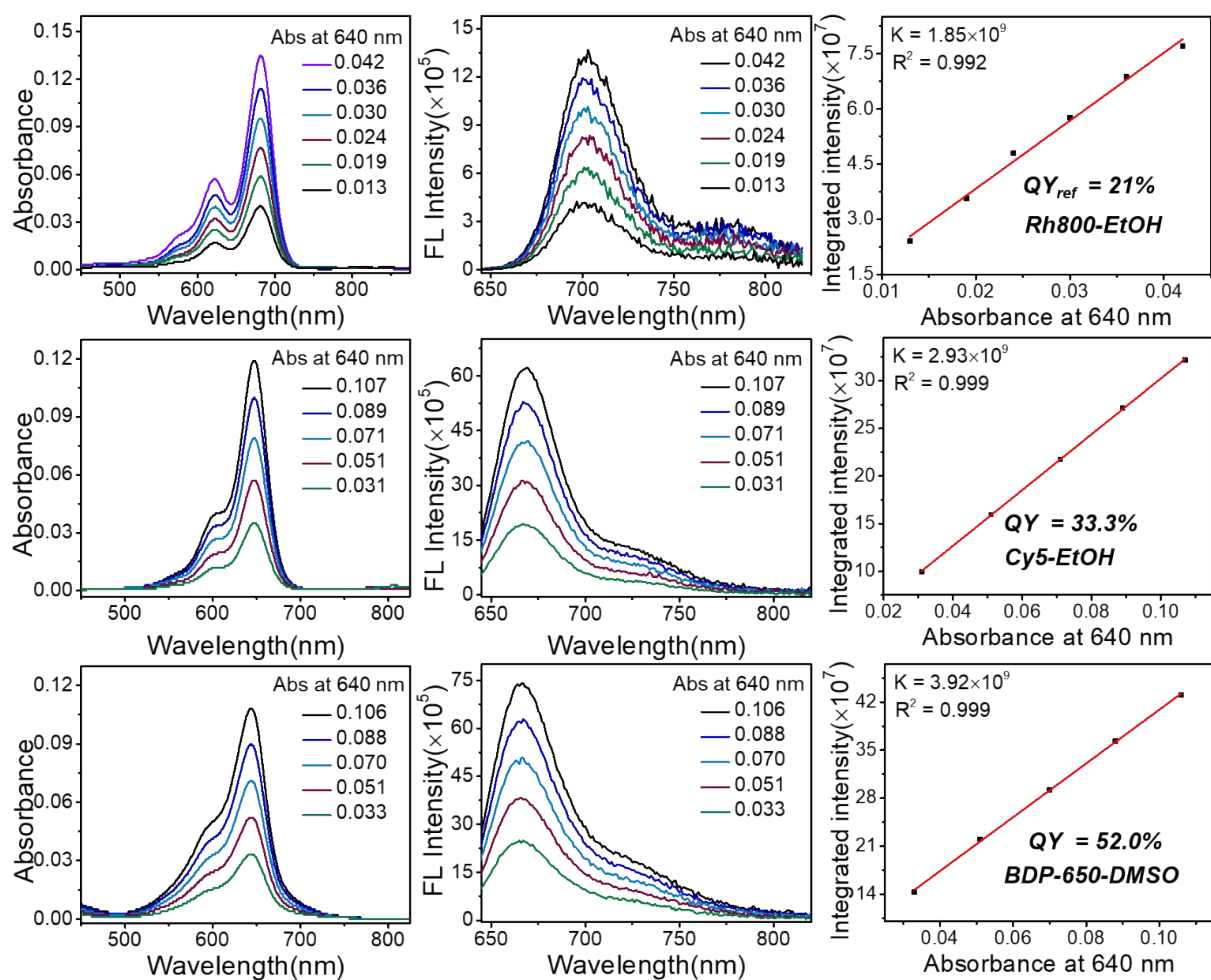

**Cy5 (in EtOH) and BDP-650 (in DMSO)**

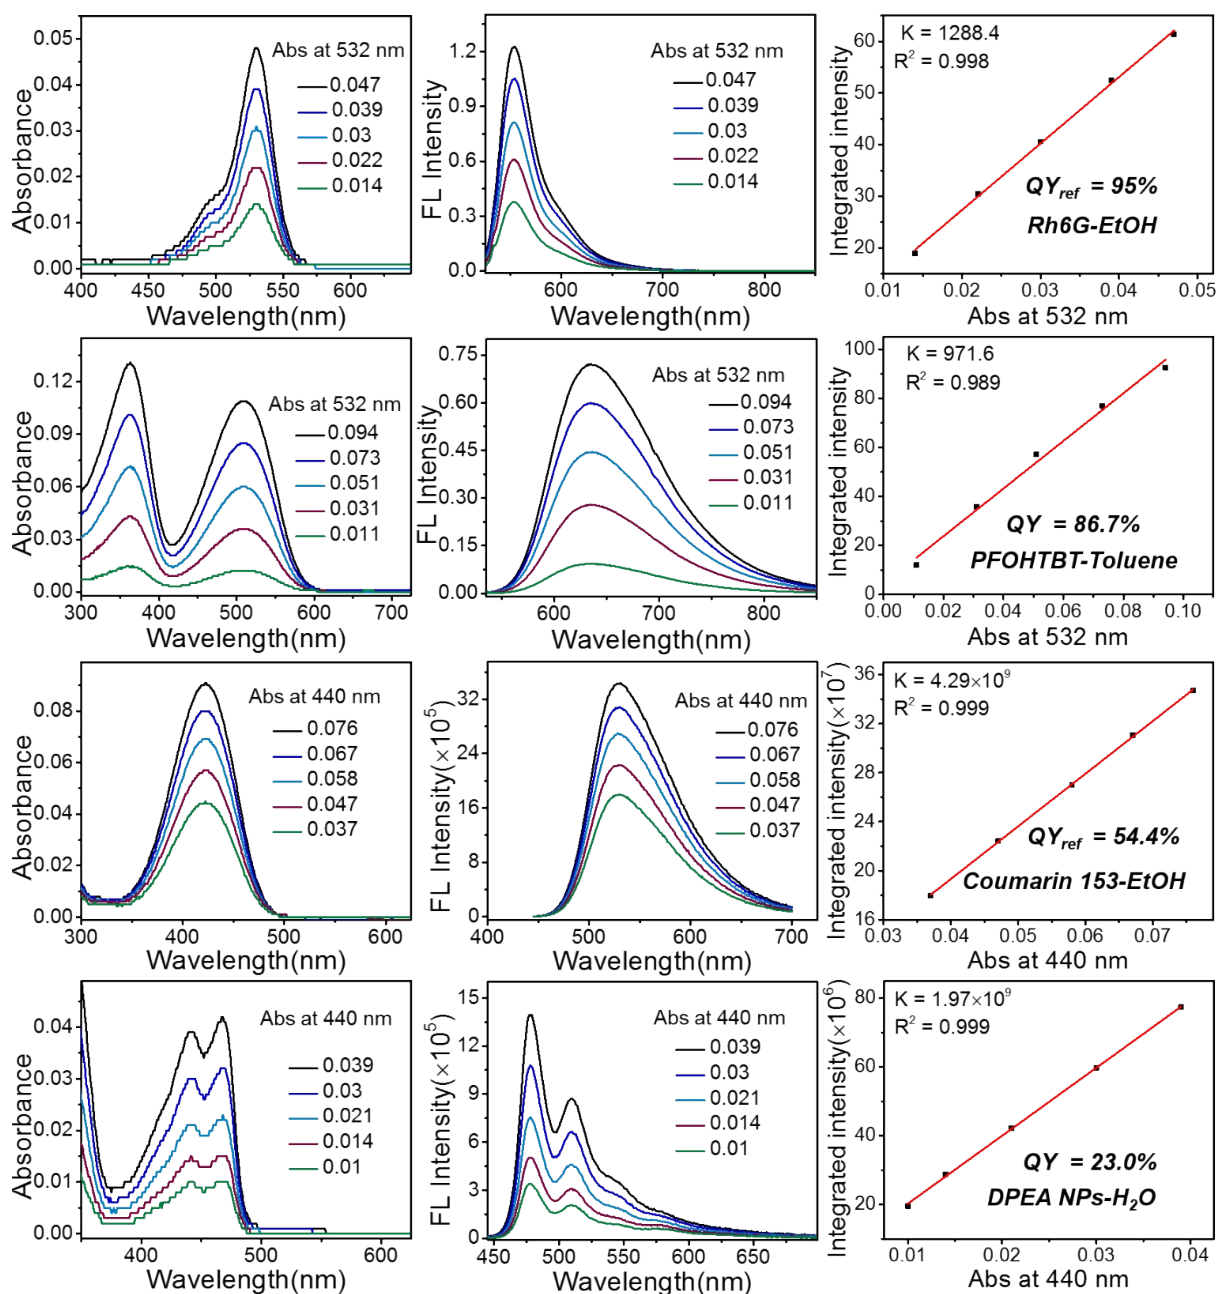

**PFOHTBT (in toluene) and DPEA NPs (in H<sub>2</sub>O)**

## <sup>1</sup>H NMR, <sup>13</sup>C NMR and MS spectra characterizations

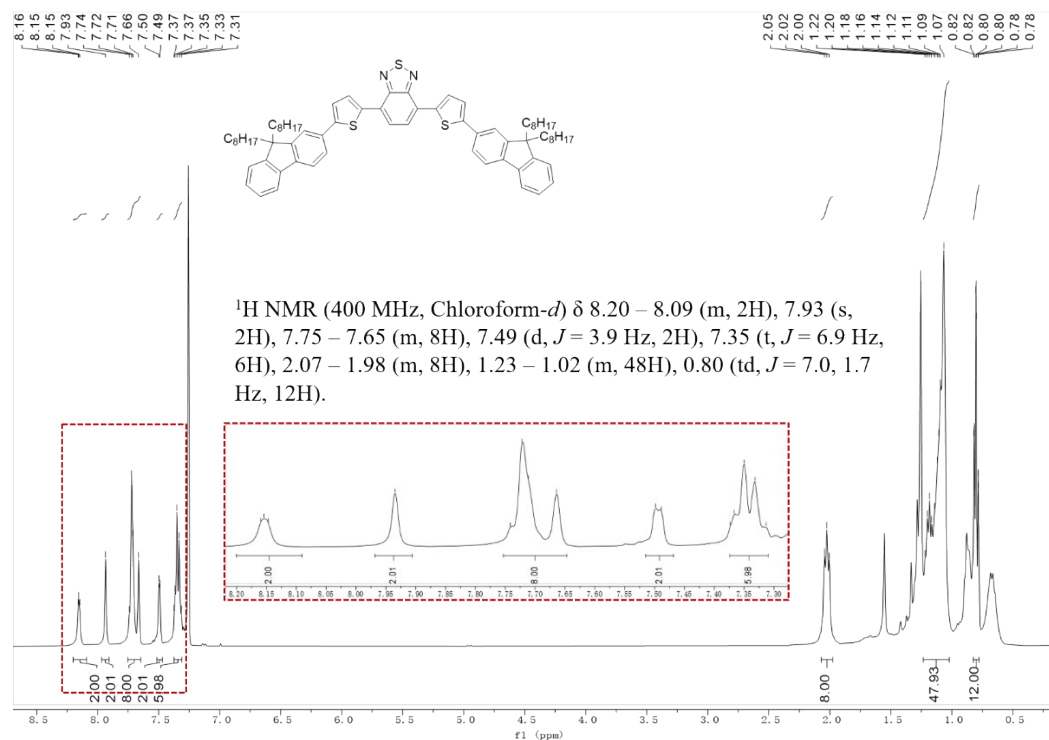

<sup>1</sup>H NMR spectrum of FT-BT (CDCl<sub>3</sub>)

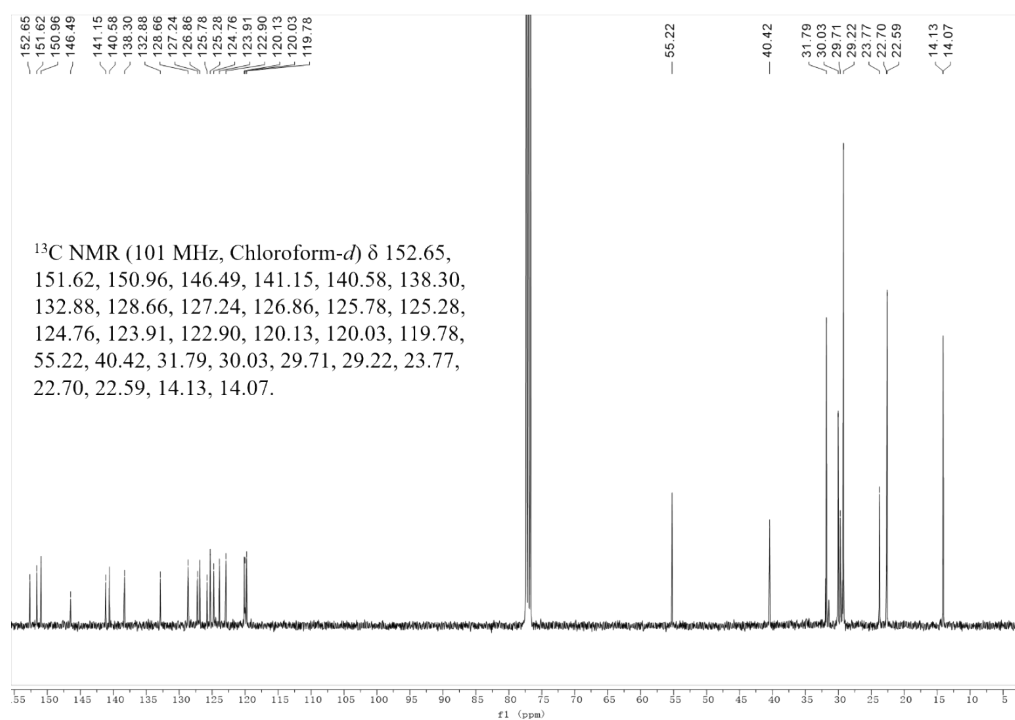

**$^{13}\text{C}$  NMR spectrum of FT-BT ( $\text{CDCl}_3$ )**

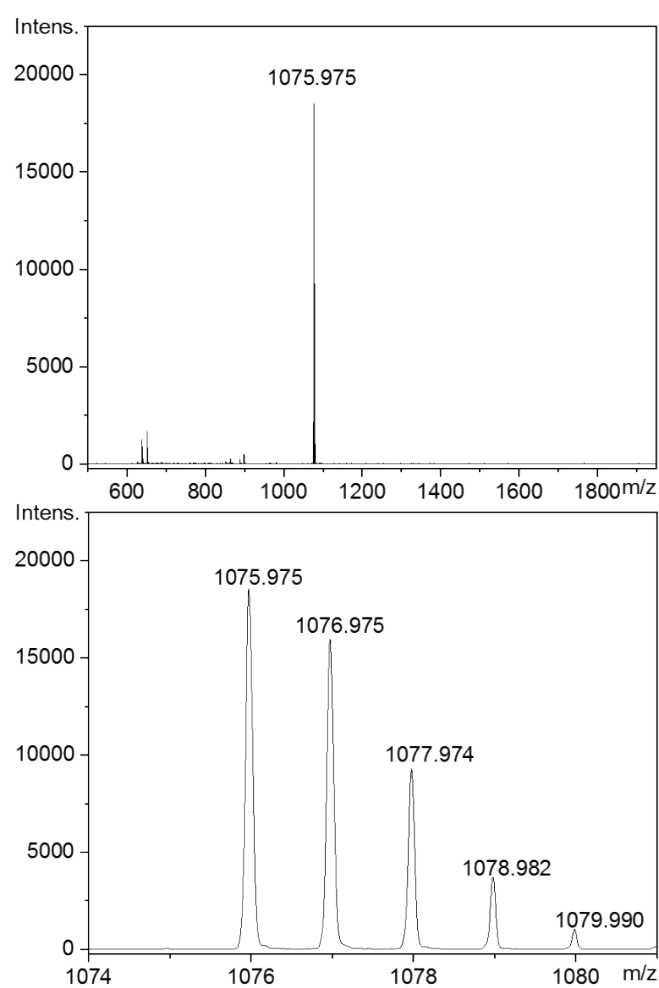

**HR-MS spectrum of FT-BT**

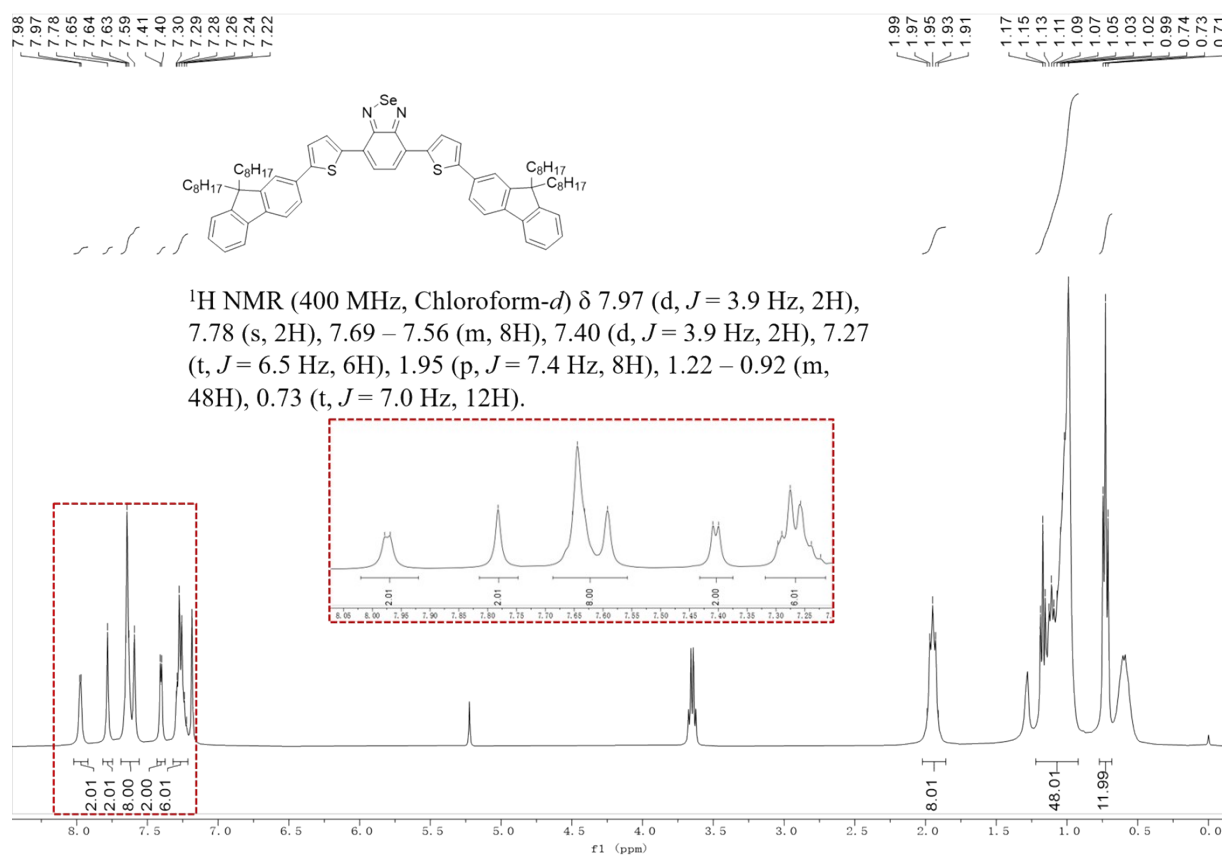

**$^1\text{H}$  NMR spectrum of FT-BSeT ( $\text{CDCl}_3$ )**

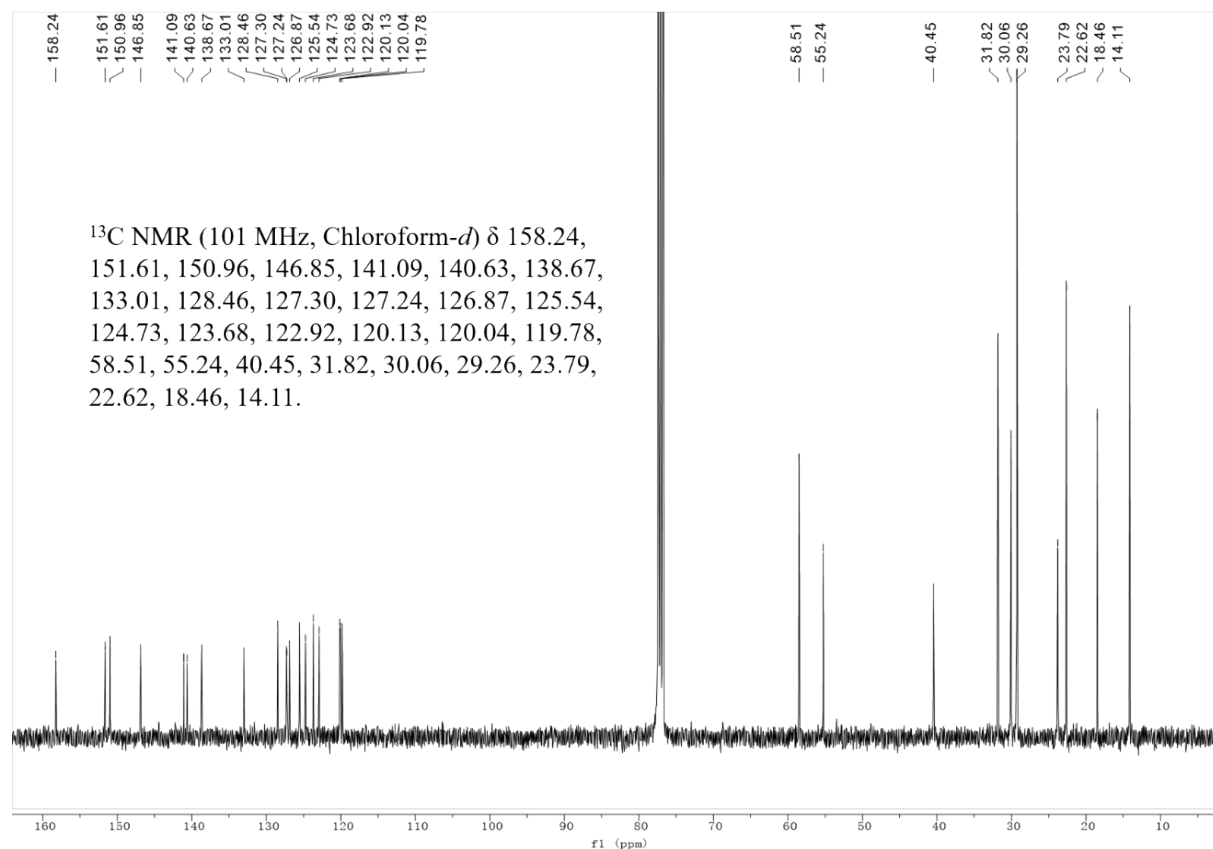

**$^{13}\text{C}$  NMR spectrum of FT-BSeT ( $\text{CDCl}_3$ )**

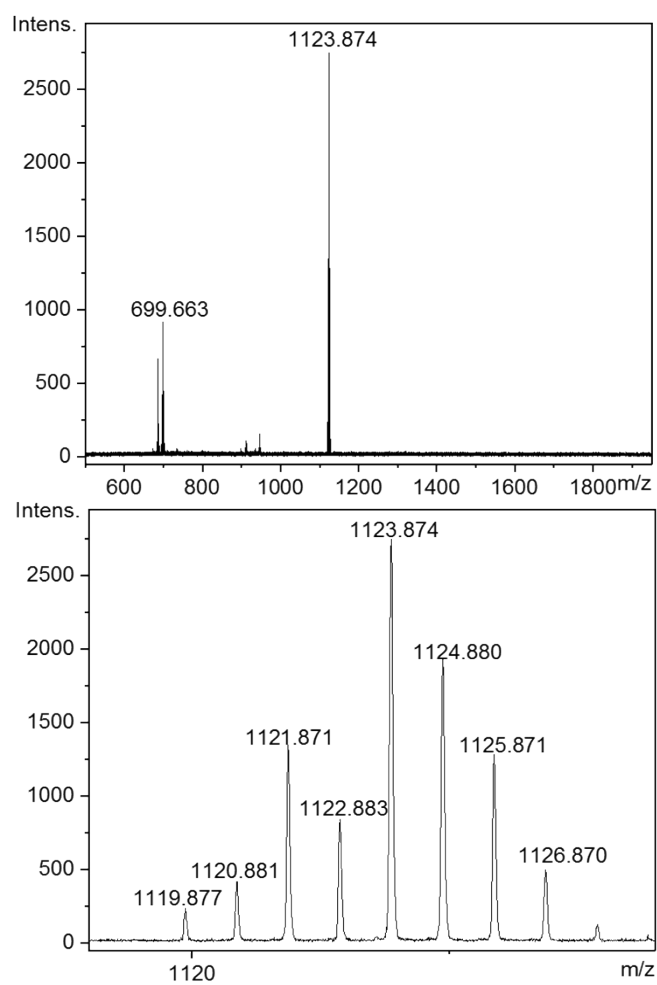

**HR-MS spectrum of FT-BSeT**

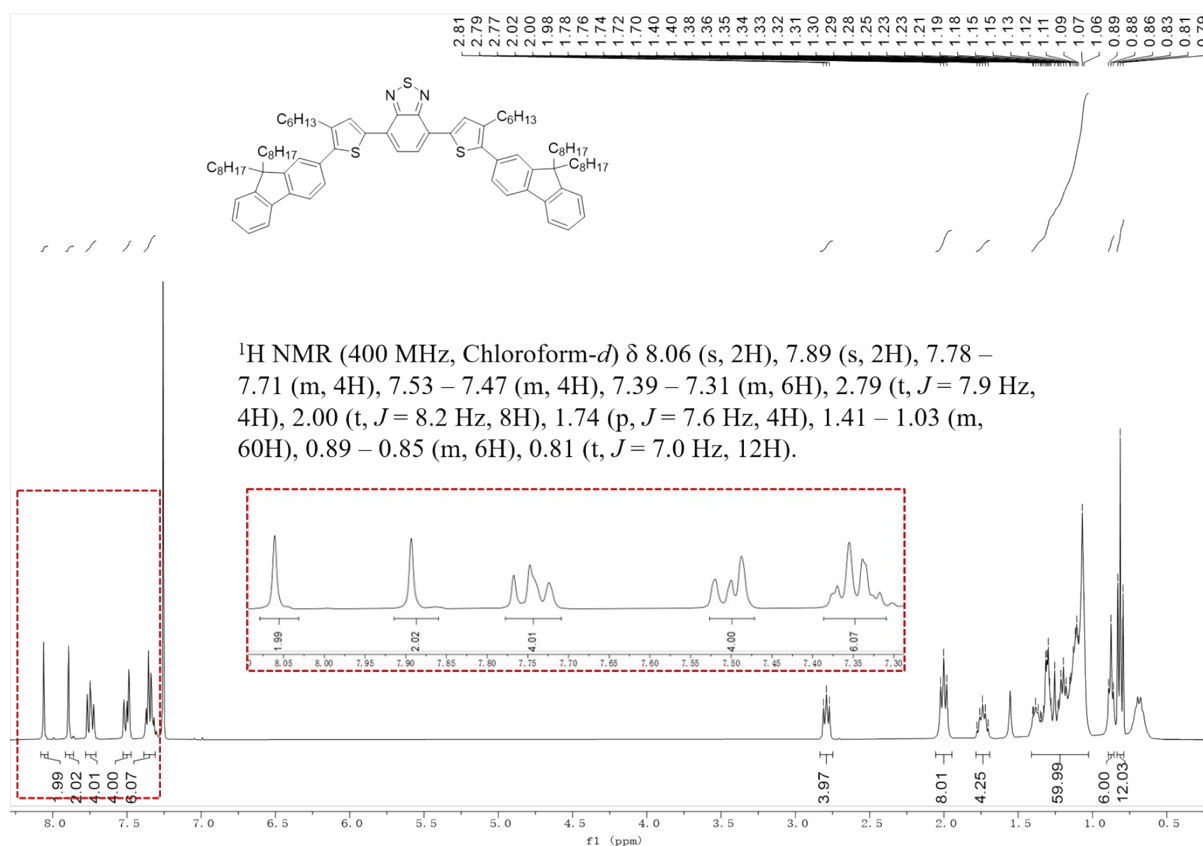

**$^1\text{H}$  NMR spectrum of FHT-BT ( $\text{CDCl}_3$ )**

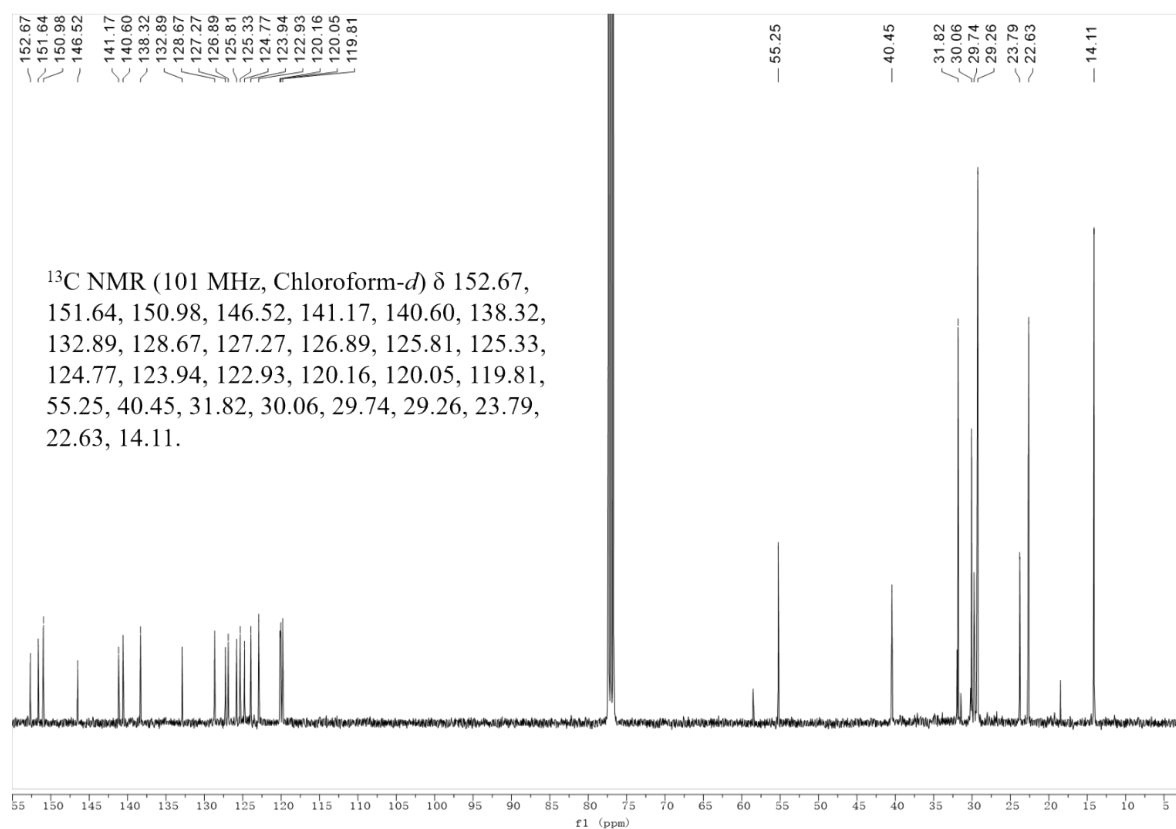

**$^{13}\text{C}$  NMR spectrum of FHT-BT ( $\text{CDCl}_3$ )**

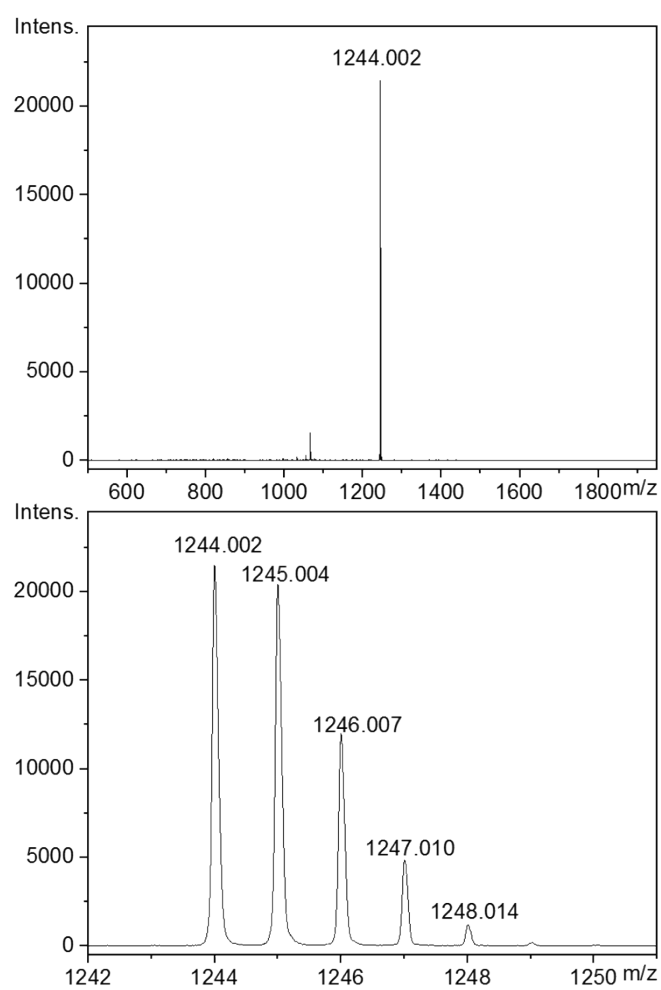

**HR-MS spectrum of FHT-BT**



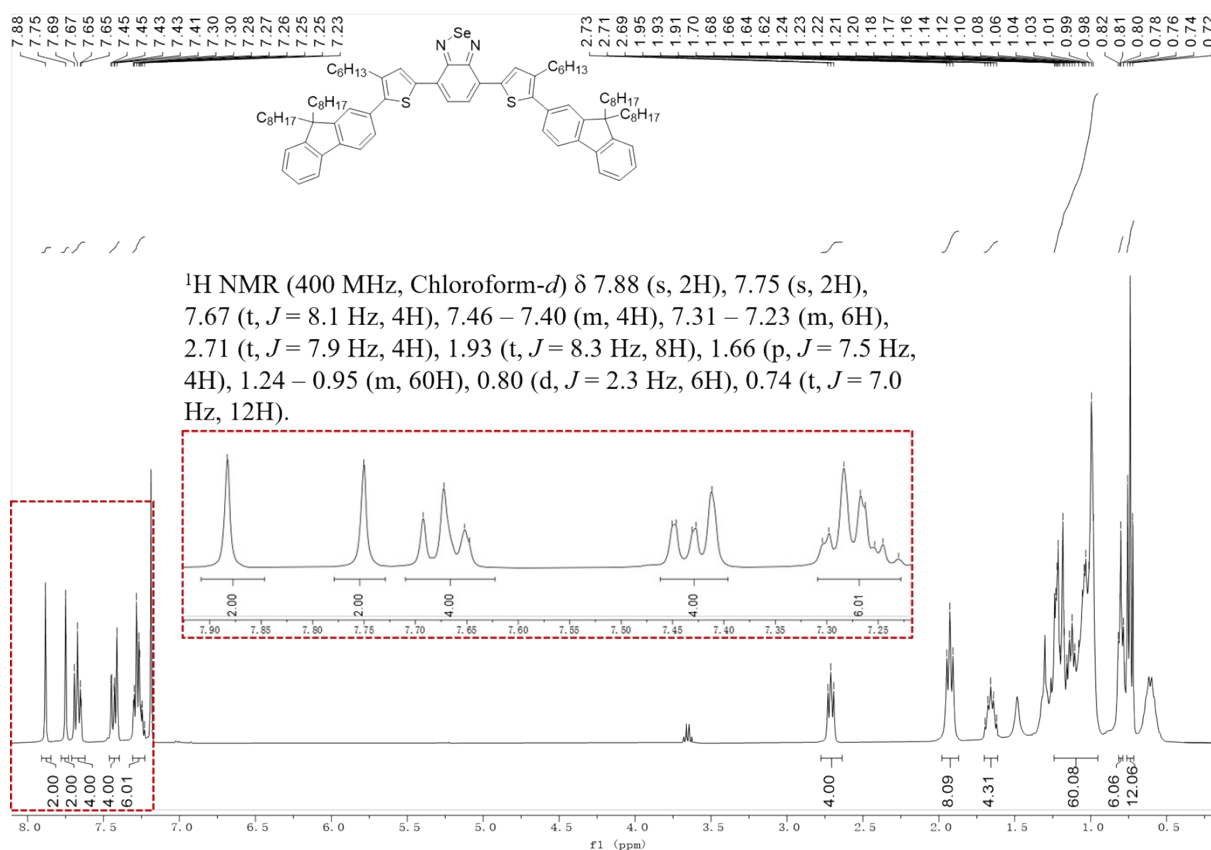

**<sup>1</sup>H NMR spectrum of FHT-BSeT (CDCl<sub>3</sub>)**

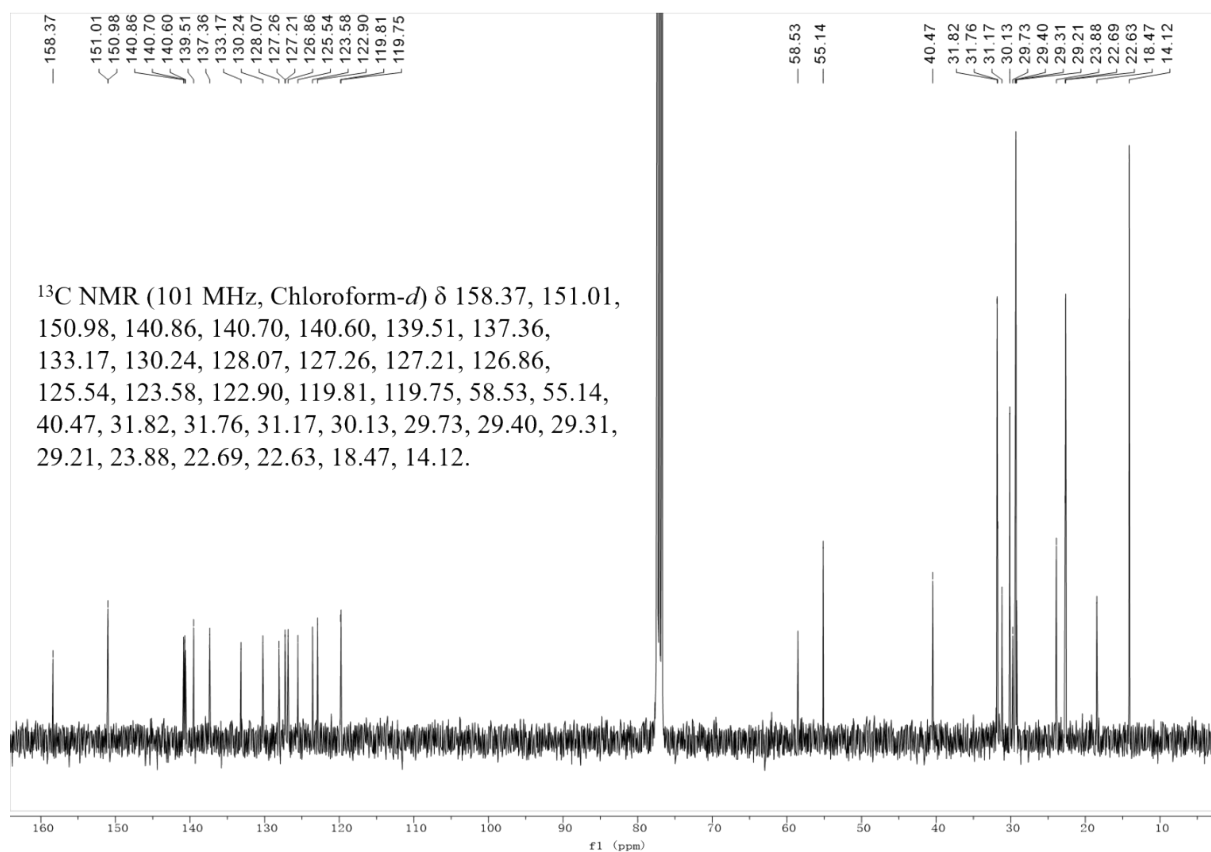

**<sup>13</sup>C NMR spectrum of FHT-BSeT (CDCl<sub>3</sub>)**

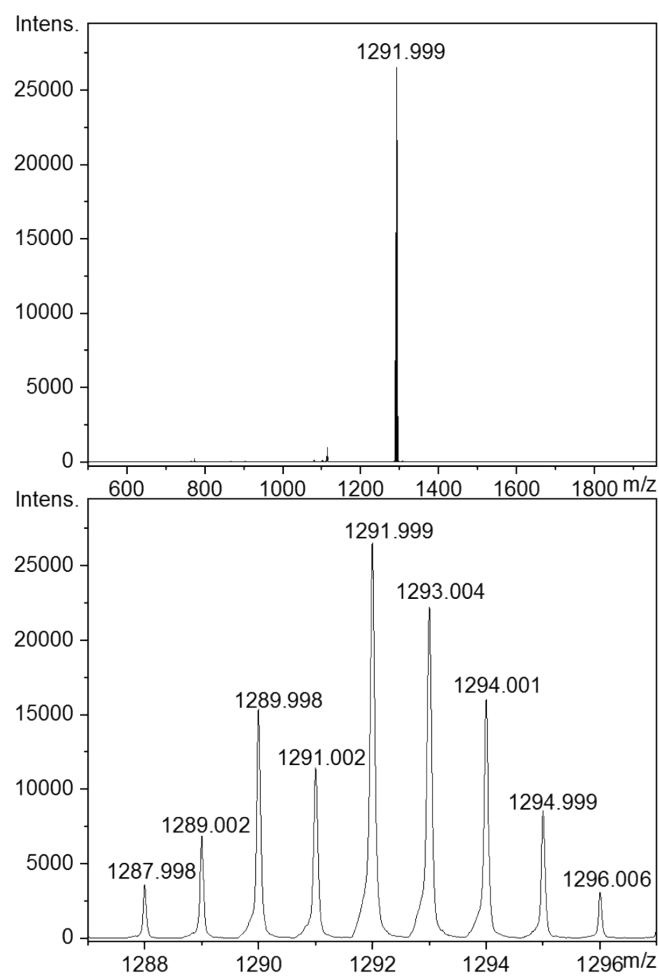

**HR-MS spectrum of FHT-BSeT**

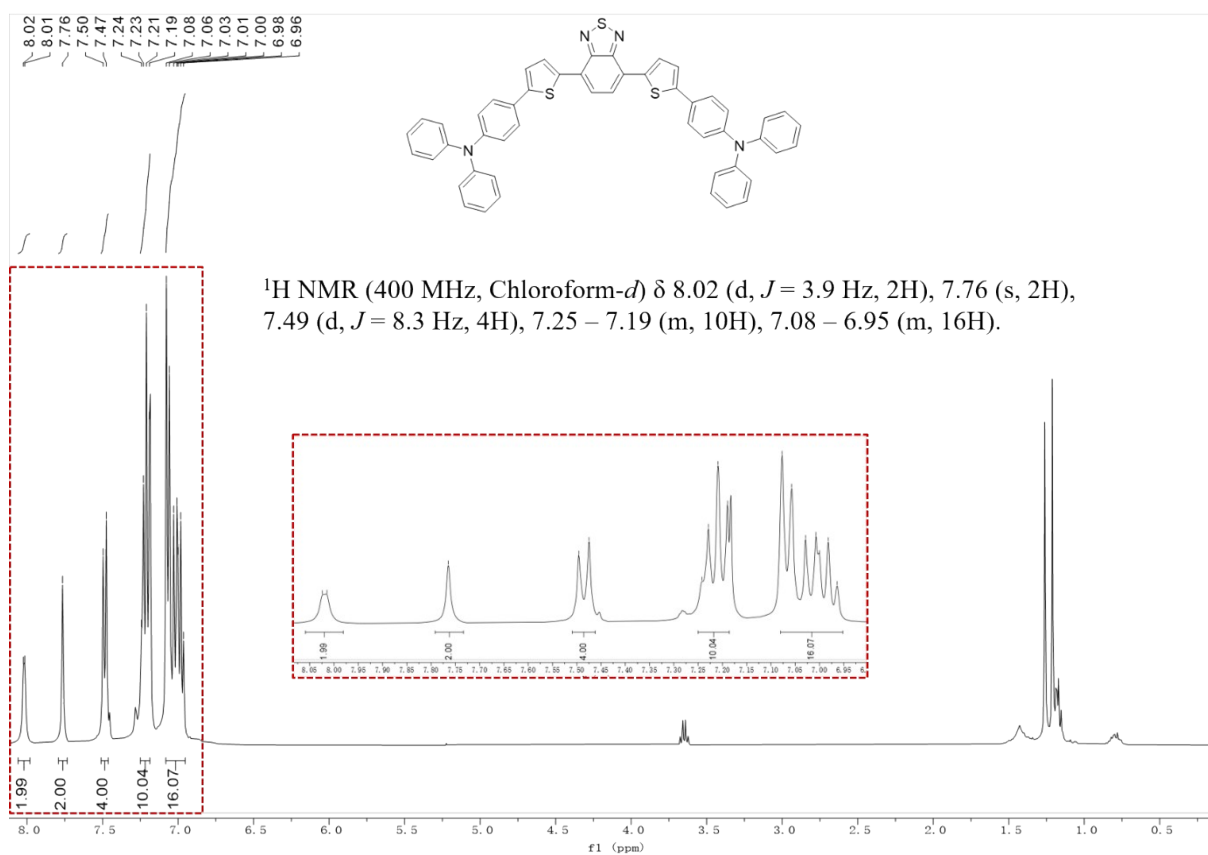

**$^1\text{H}$  NMR spectrum of TPAT-BT ( $\text{CDCl}_3$ )**

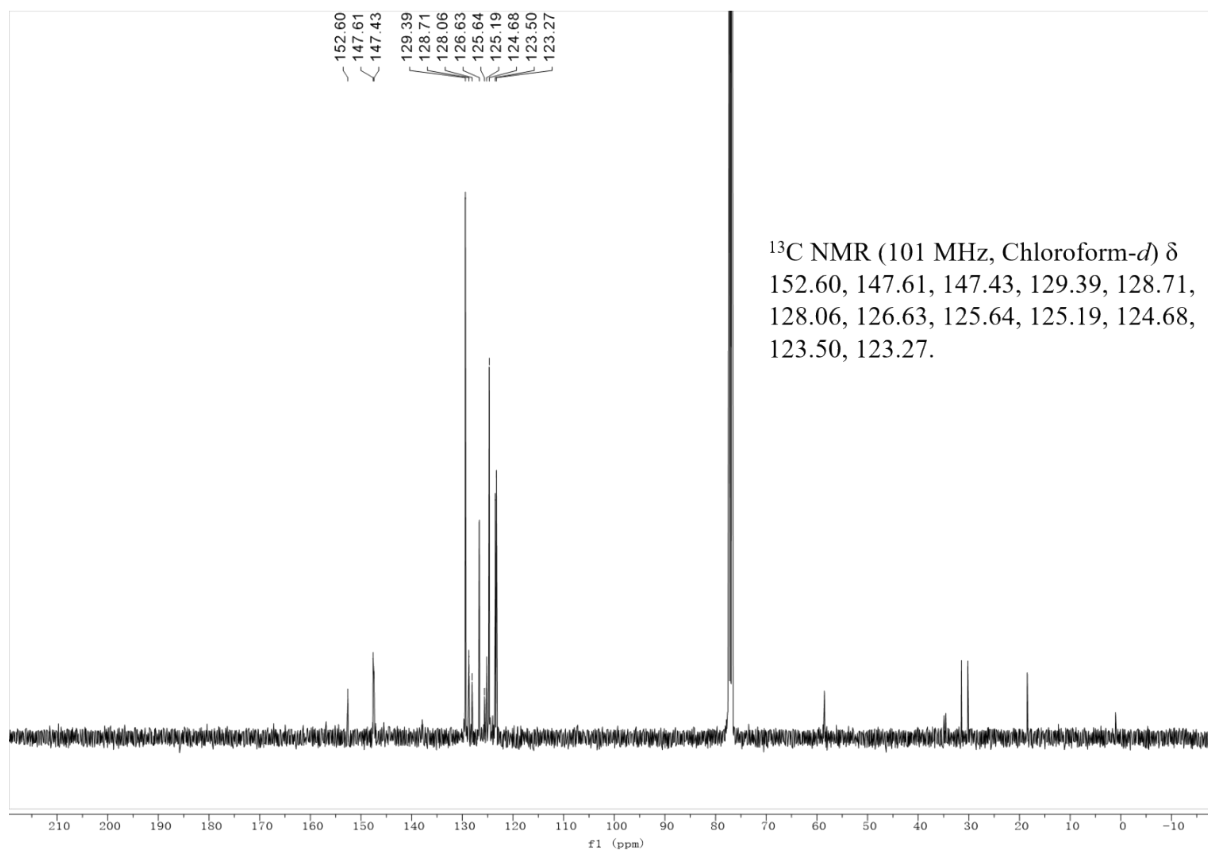

**$^{13}\text{C}$  NMR spectrum of TPAT-BT ( $\text{CDCl}_3$ )**

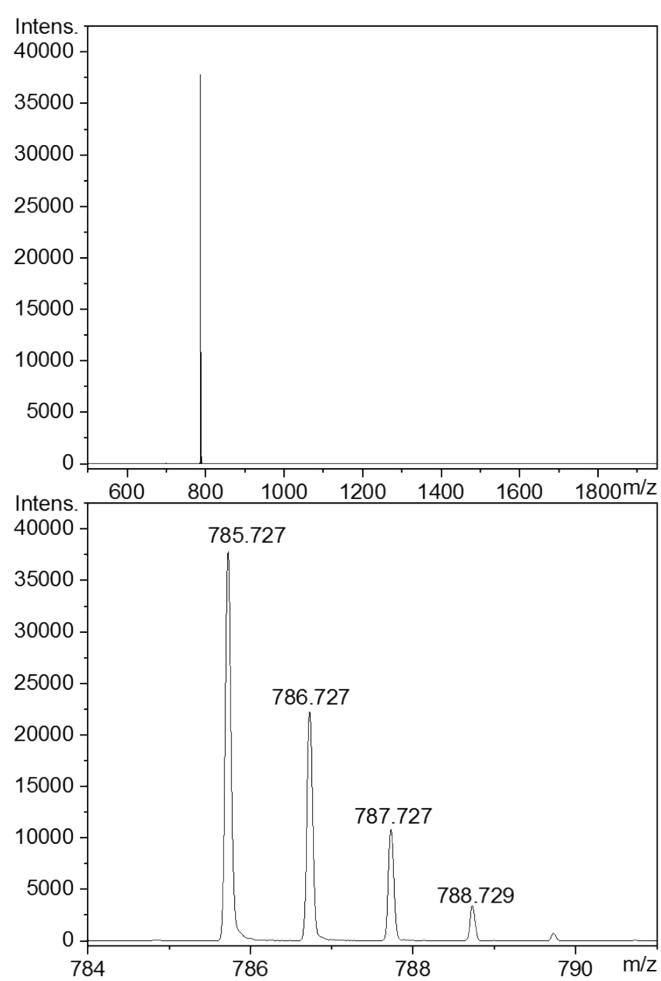

**HR-MS spectrum of TPAT-BT**

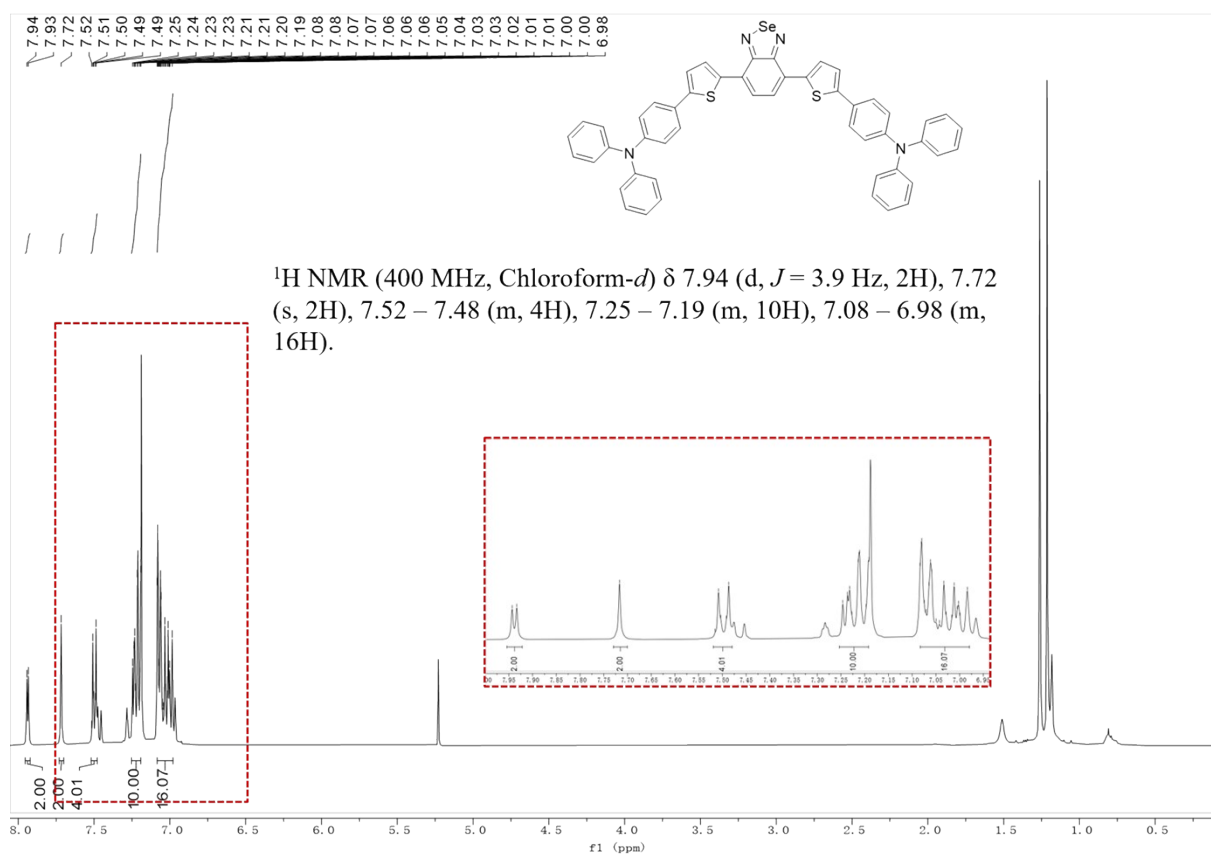

**$^1\text{H}$  NMR spectrum of TPAT-BSeT ( $\text{CDCl}_3$ )**

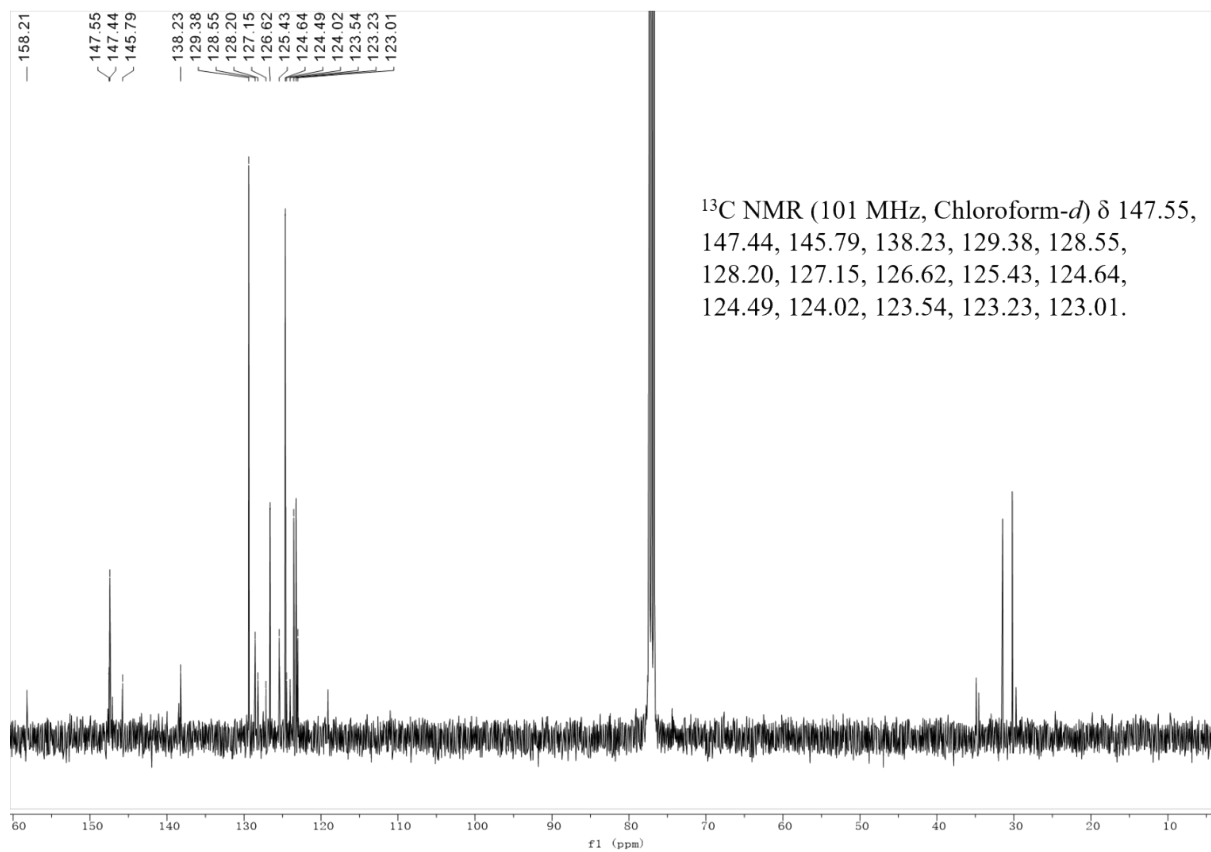

**$^{13}\text{C}$  NMR spectrum of TPAT-BSeT ( $\text{CDCl}_3$ )**

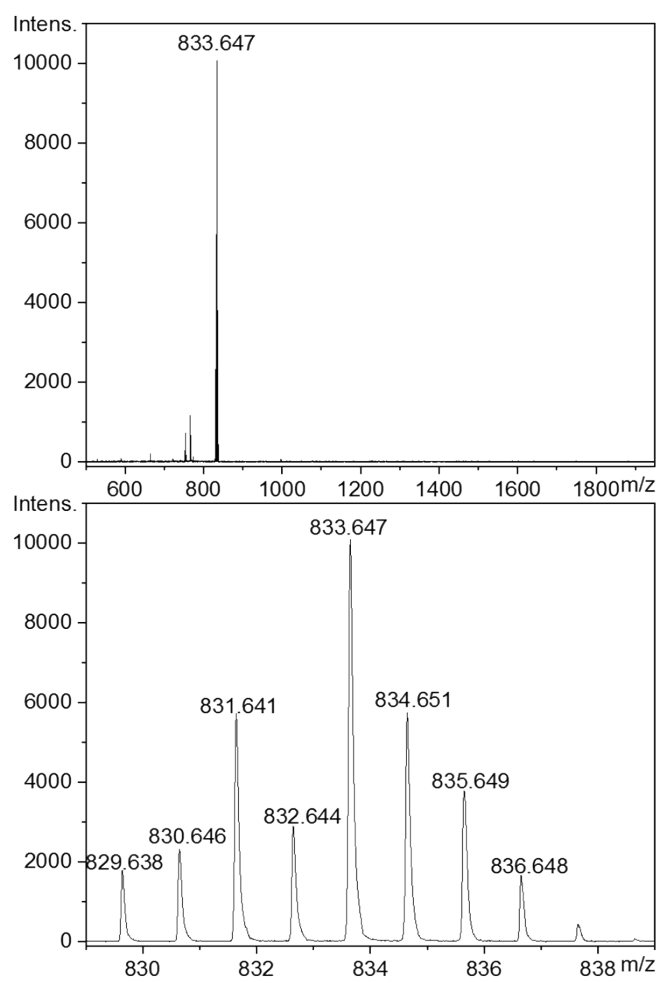

**HR-MS spectrum of TPAT-BSeT**

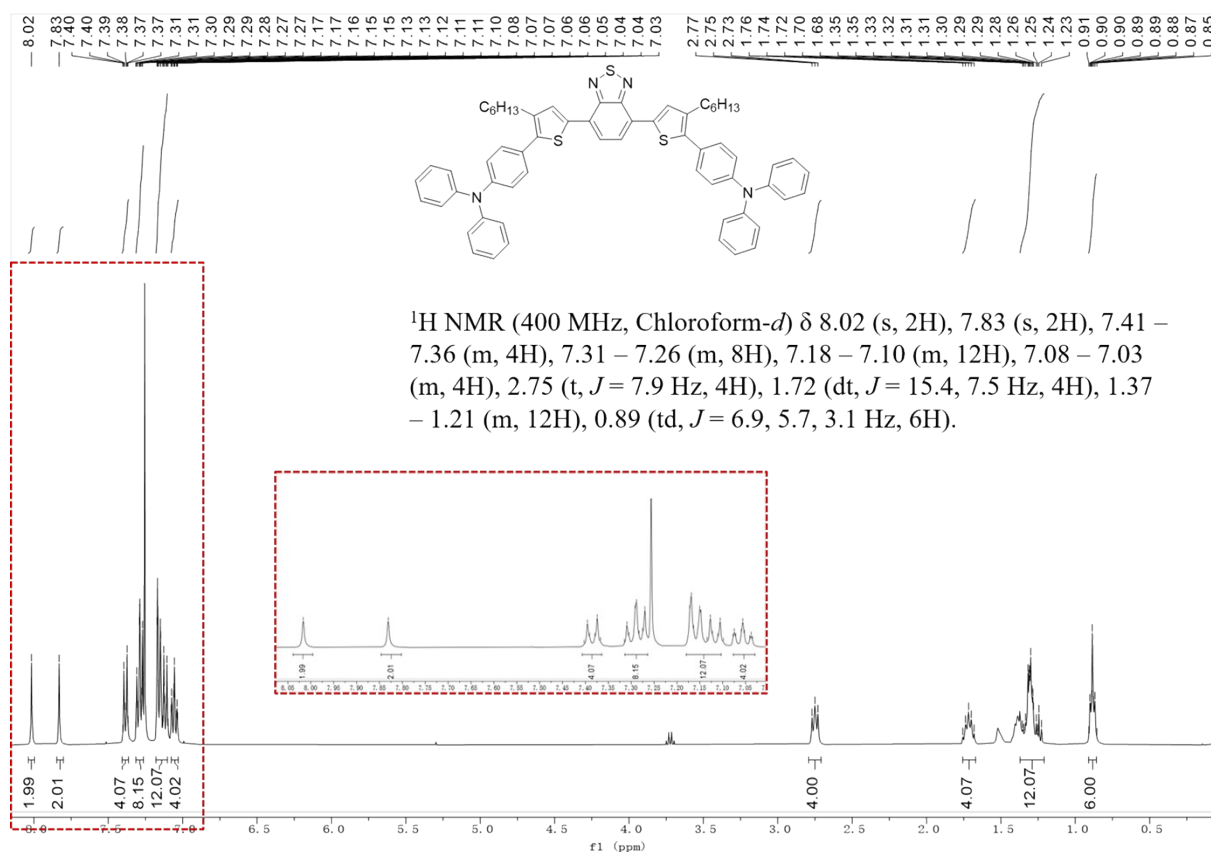

**<sup>1</sup>H NMR spectrum of TPAHT-BT (CDCl<sub>3</sub>)**

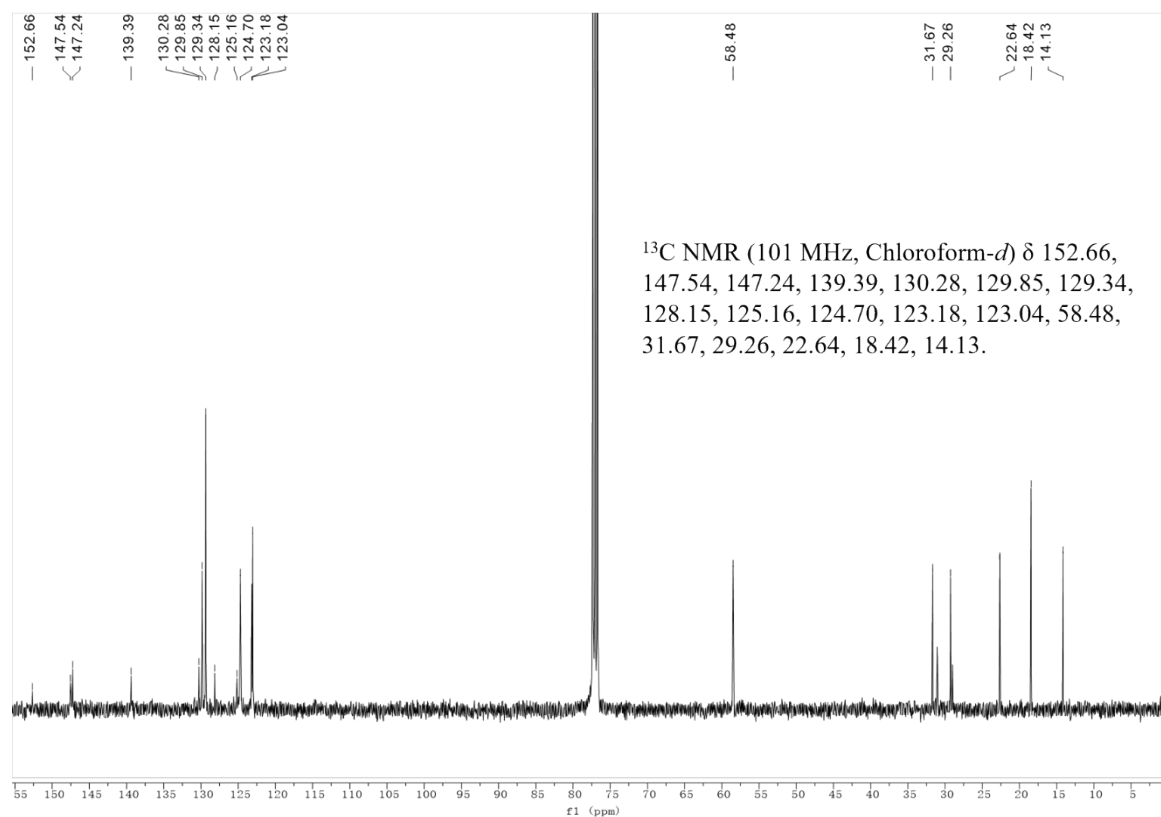

**<sup>13</sup>C NMR spectrum of TPAHT-BT (CDCl<sub>3</sub>)**



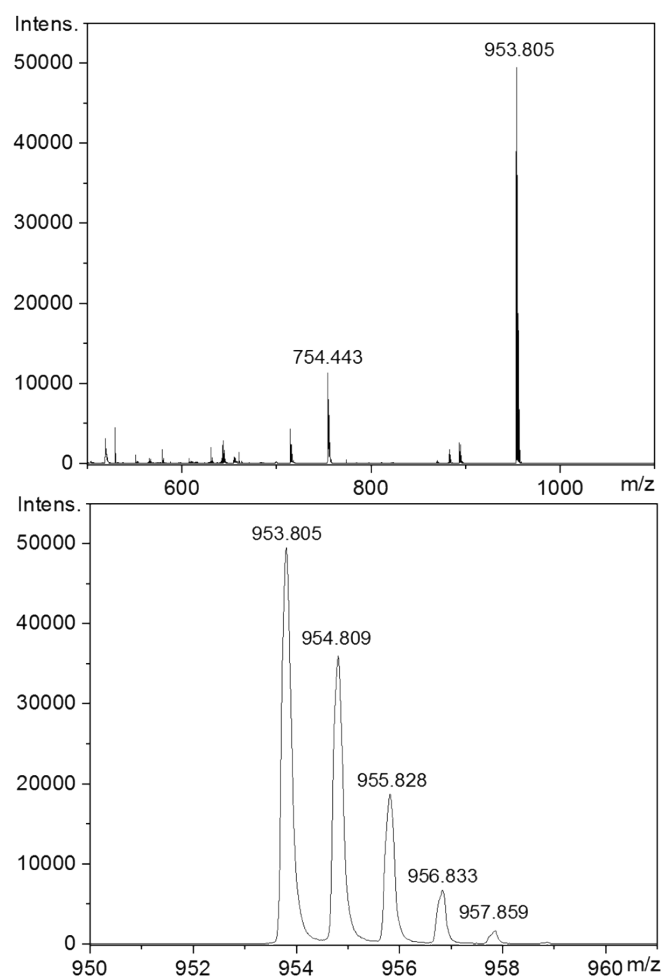

**HR-MS spectrum of TPAHT-BT**



**$^{13}\text{C}$  NMR spectrum of TPAHT-BSeT ( $\text{CDCl}_3$ )**

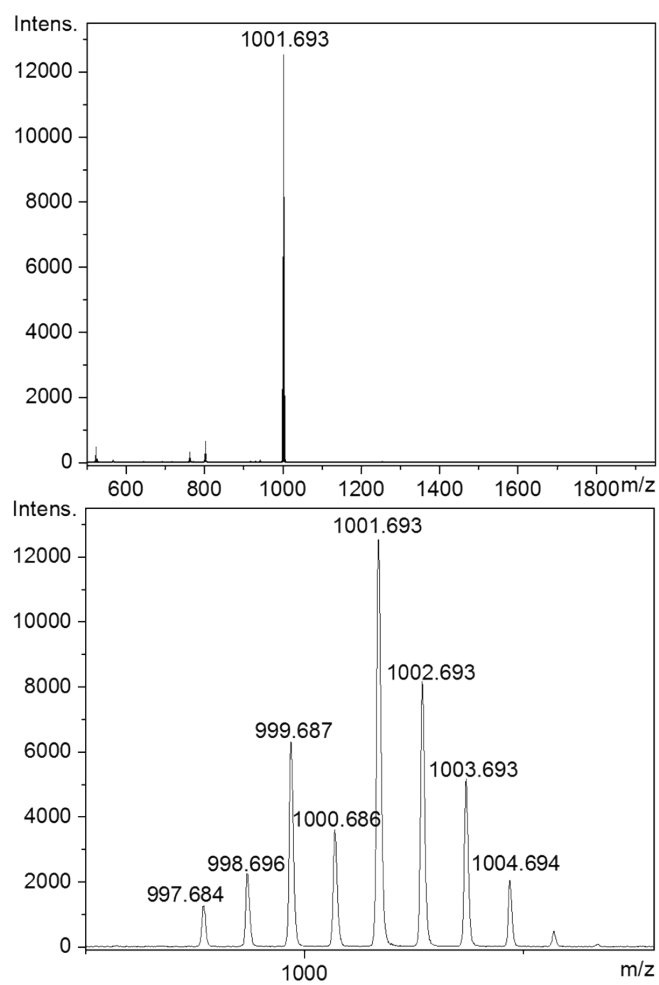

**HR-MS spectrum of TPAHT-BSeT**

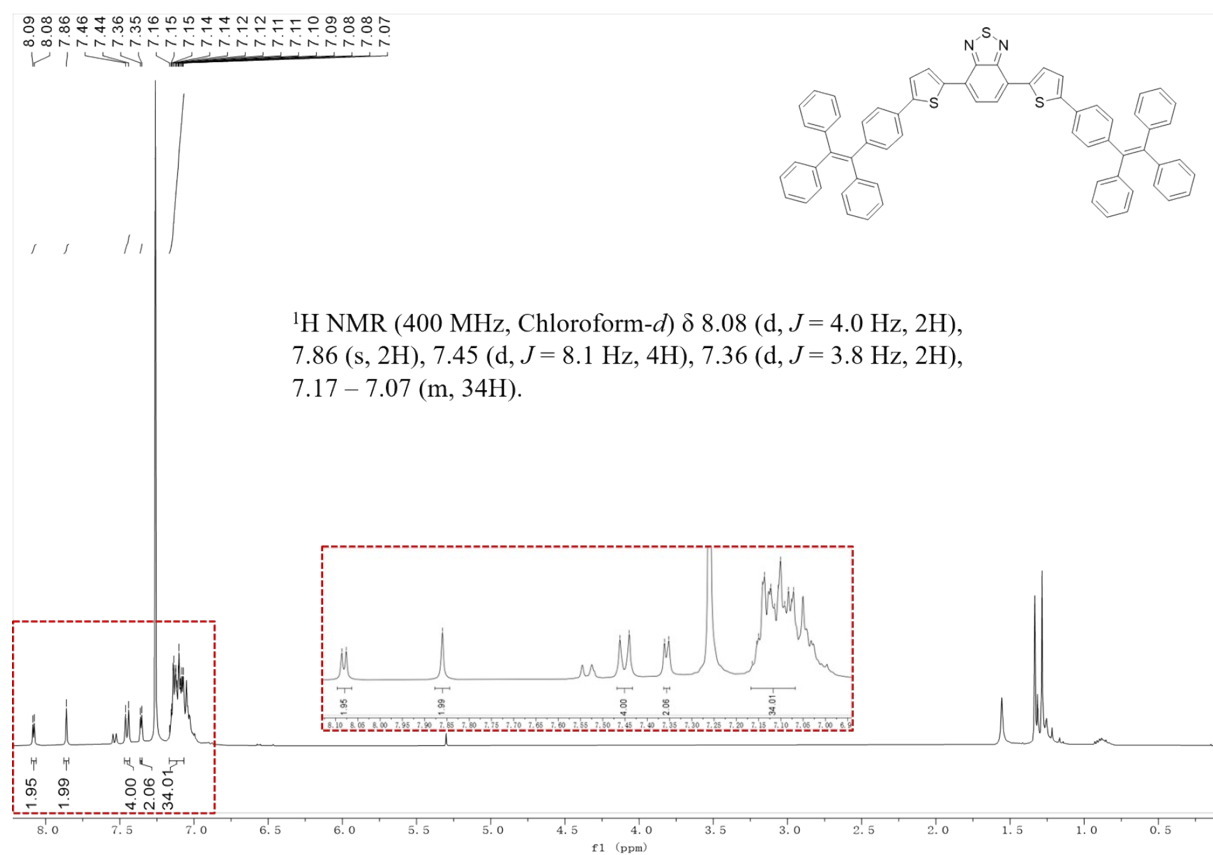

**<sup>1</sup>H NMR spectrum of TPET-BT (CDCl<sub>3</sub>)**

**N.D. (Due to the limited solubility of TPET-BT in these deuterium reagent including CDCl<sub>3</sub>, DMSO-*d*<sub>6</sub>, benze-*d*<sub>6</sub> and toluene-*d*<sub>8</sub>, the <sup>13</sup>C NMR spectrum of TPET-BT was not determined)**

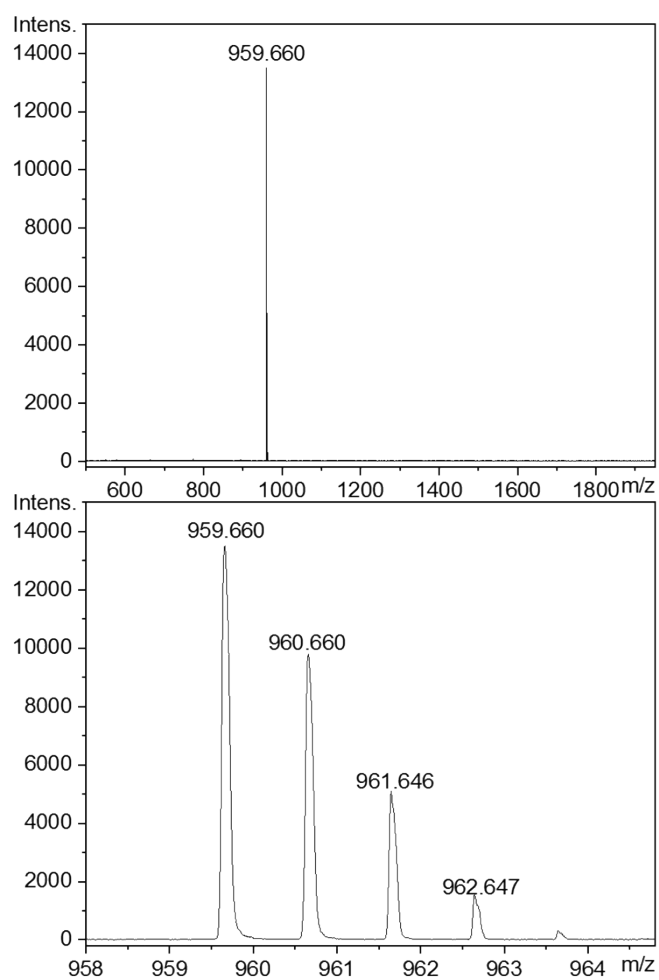

**HR-MS spectrum of TPET-BT**

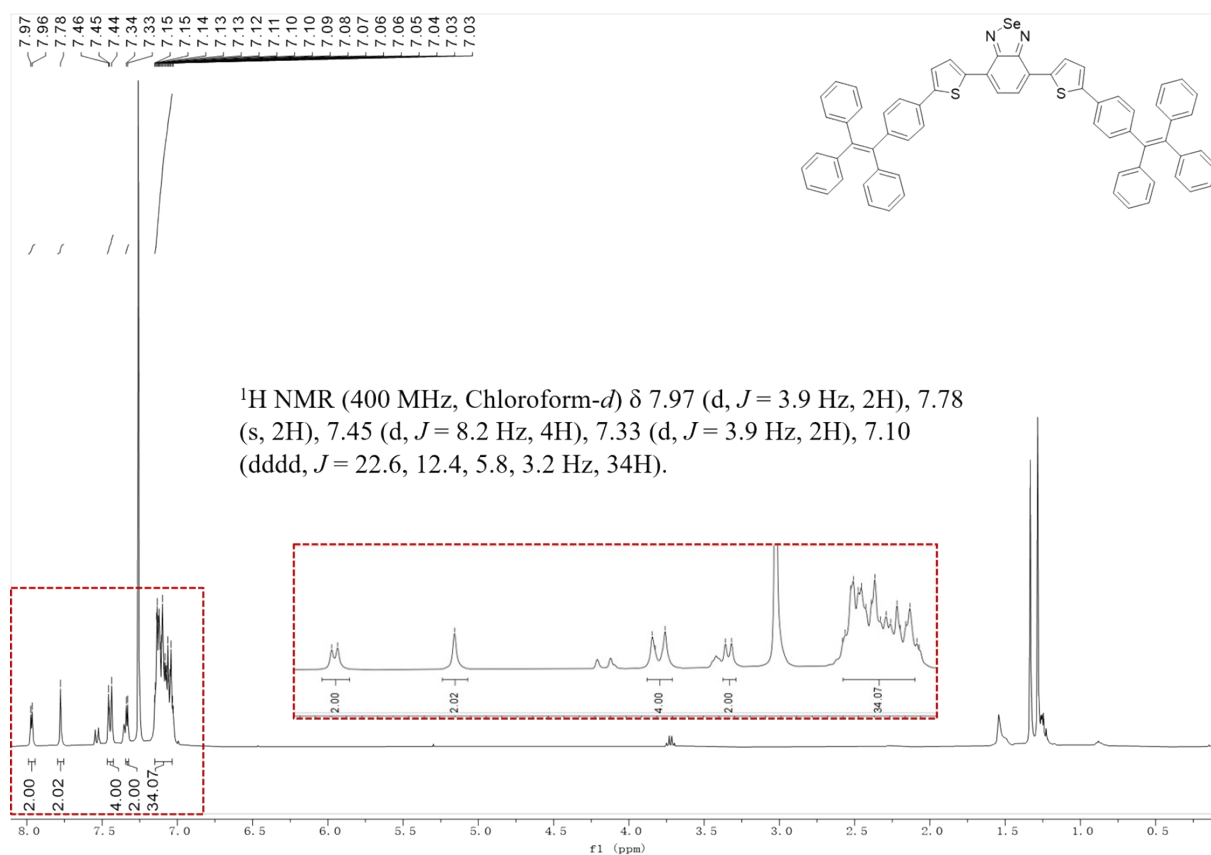

**<sup>1</sup>H NMR spectrum of TPET-BSeT (CDCl<sub>3</sub>)**

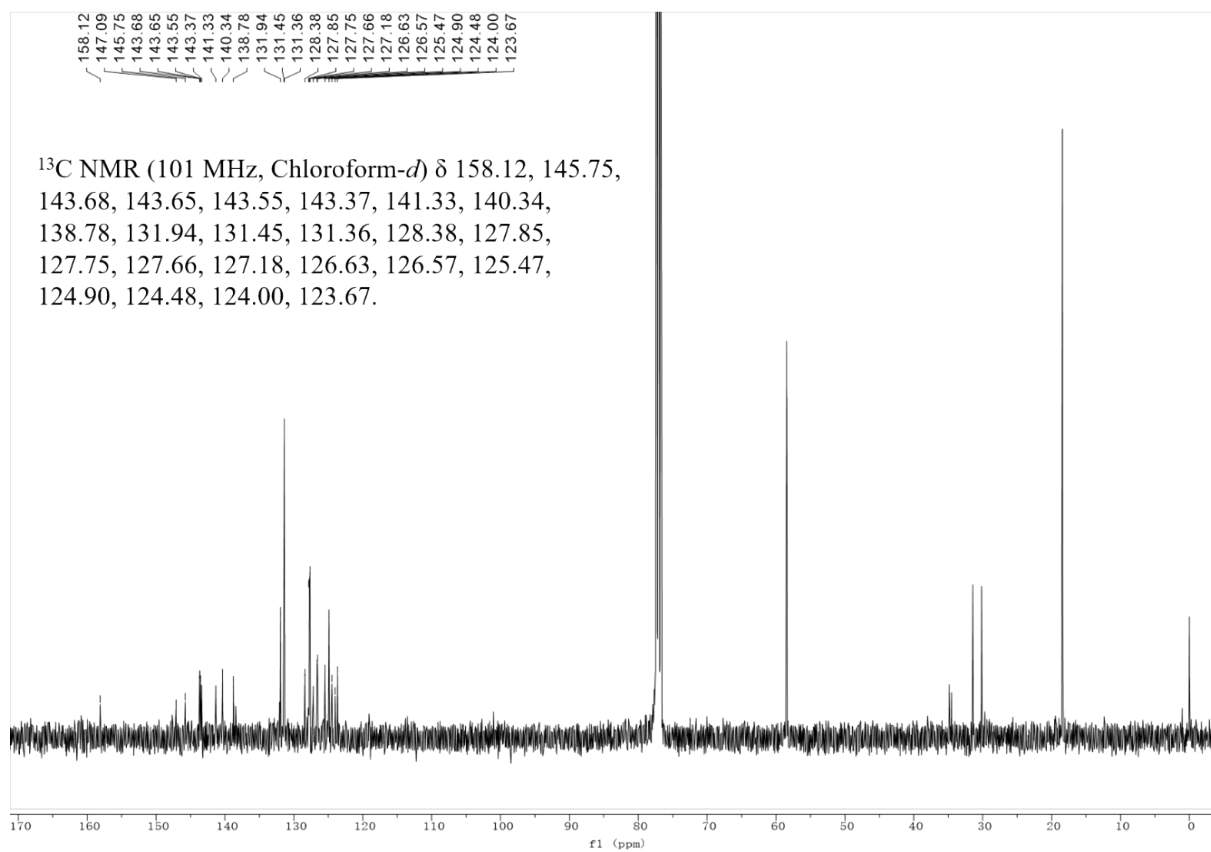

**<sup>13</sup>C NMR spectrum of TPET-BSeT (CDCl<sub>3</sub>)**

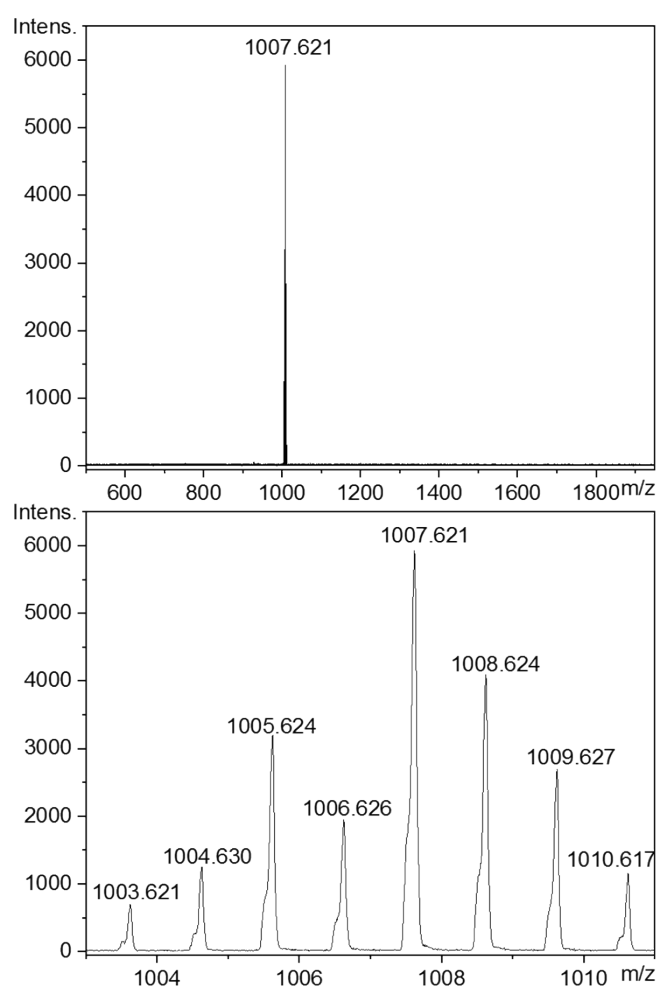

**HR-MS spectrum of TPET-BSeT**





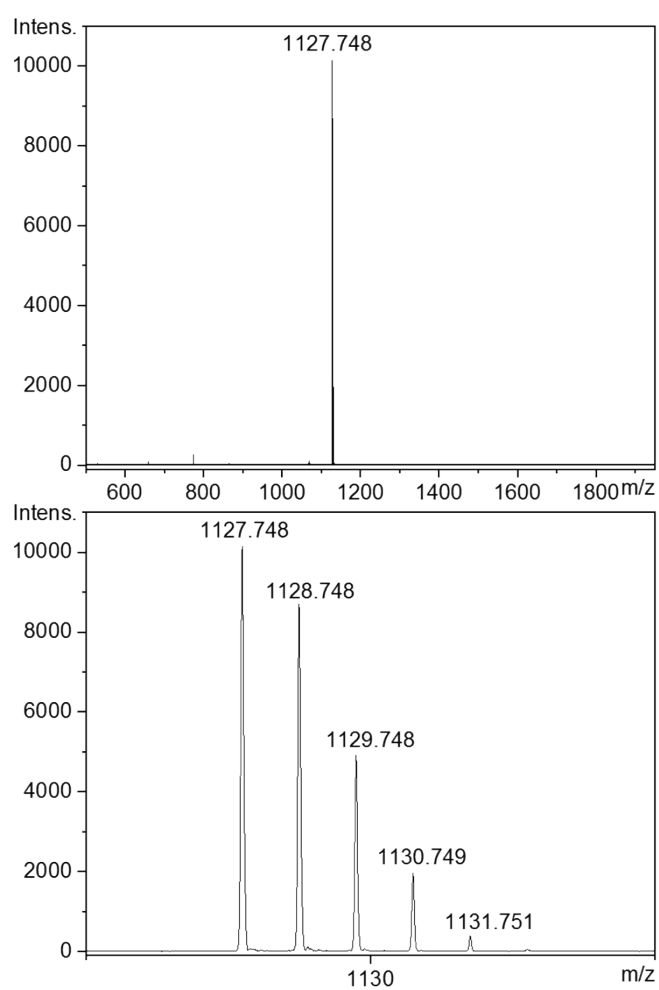

**HR-MS spectrum of TPEHT-BT**

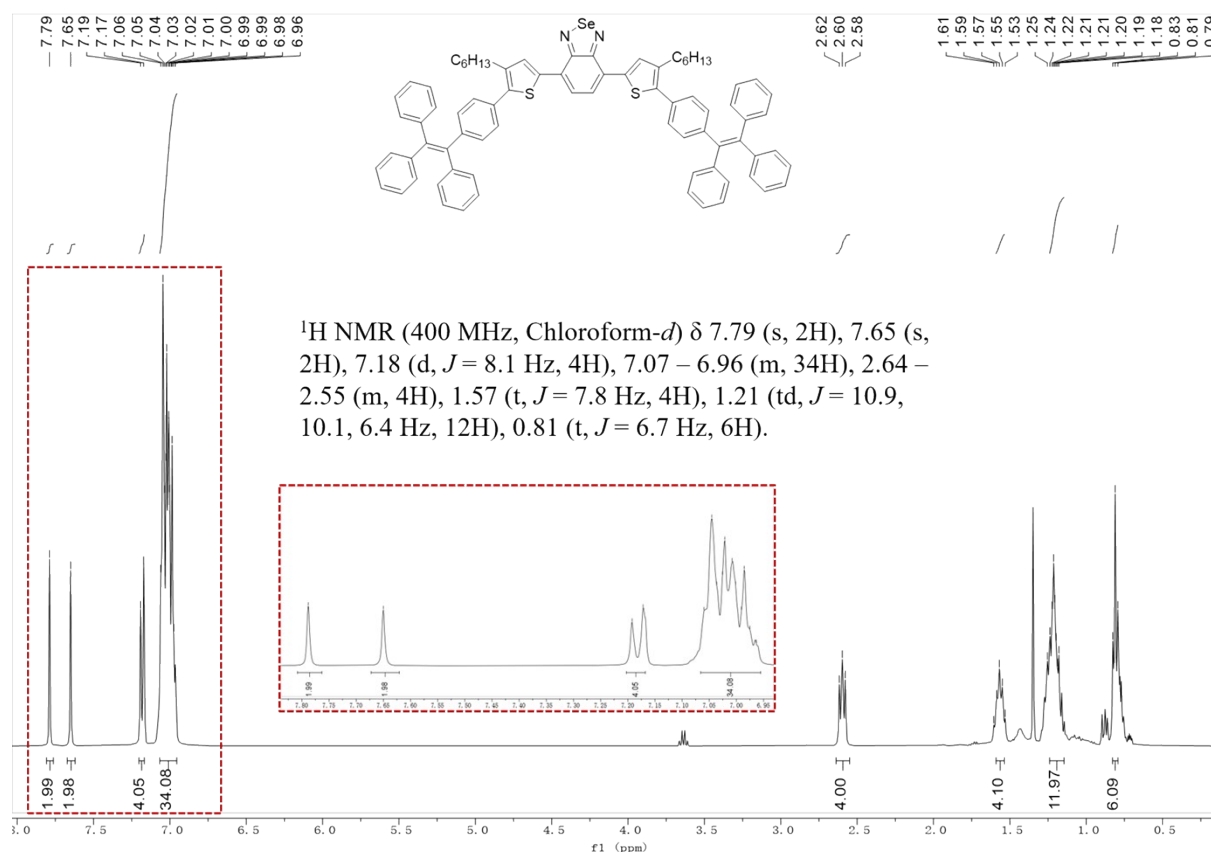

**<sup>1</sup>H NMR spectrum of TPEHT-BSeT (CDCl<sub>3</sub>)**

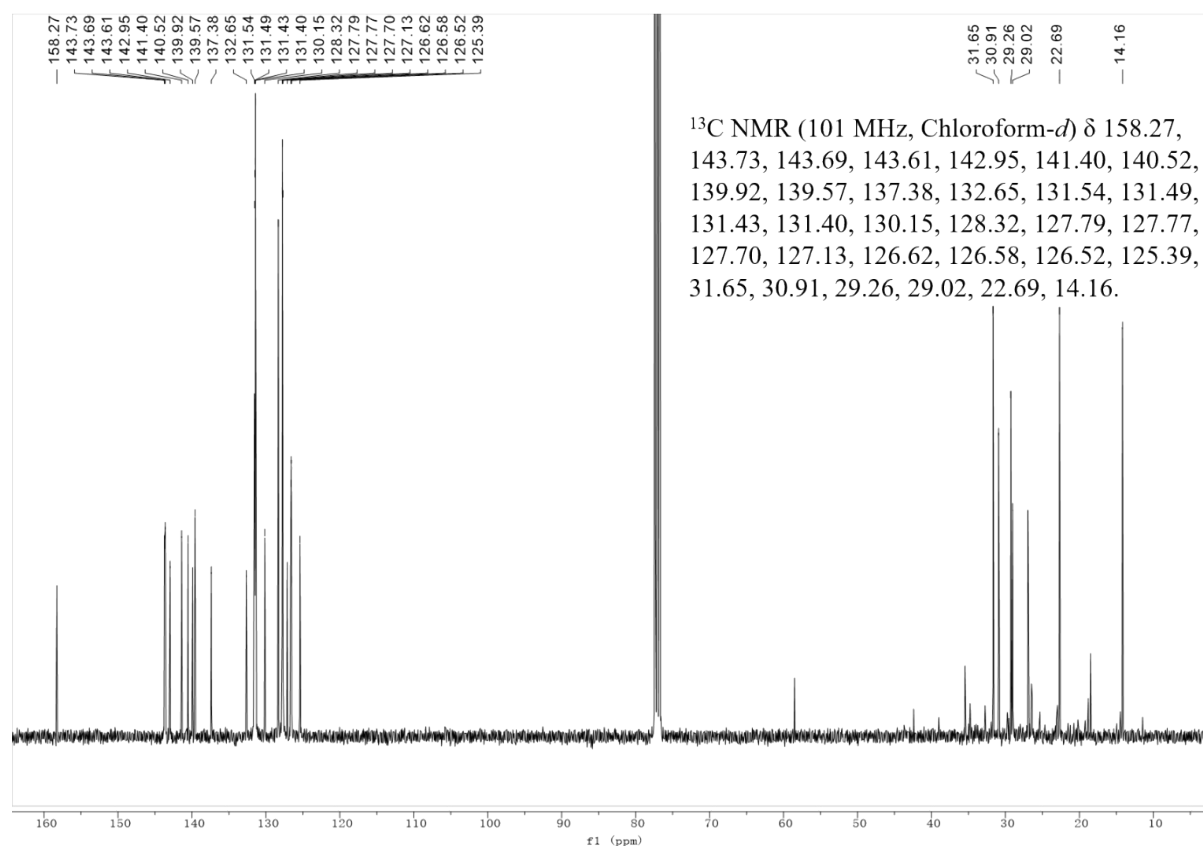

**<sup>13</sup>C NMR spectrum of TPEHT-BSeT (CDCl<sub>3</sub>)**

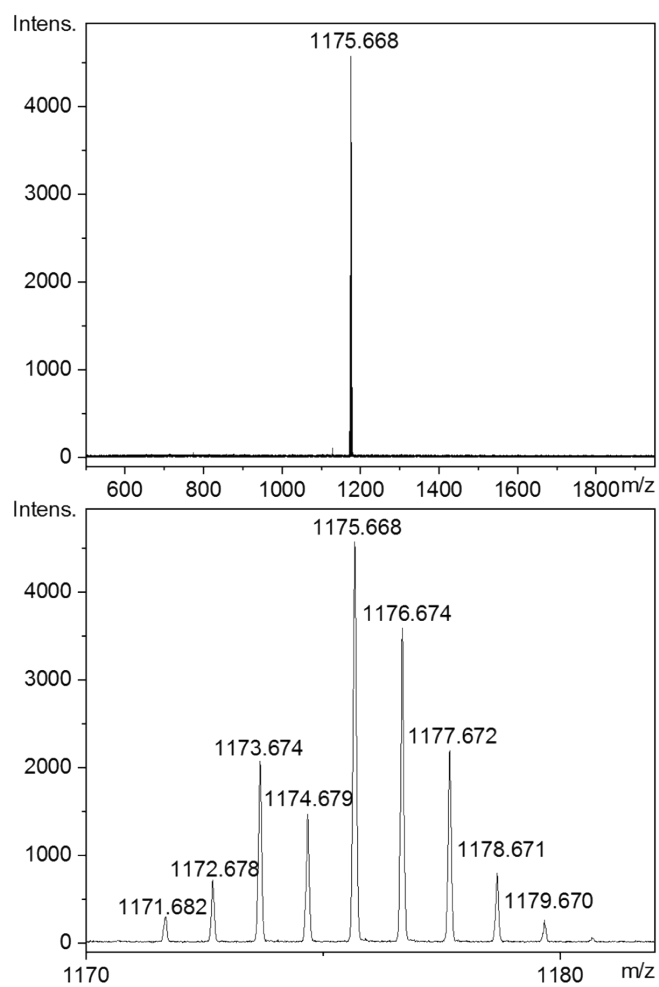

**HR-MS spectrum of TPEHT-BSeT**

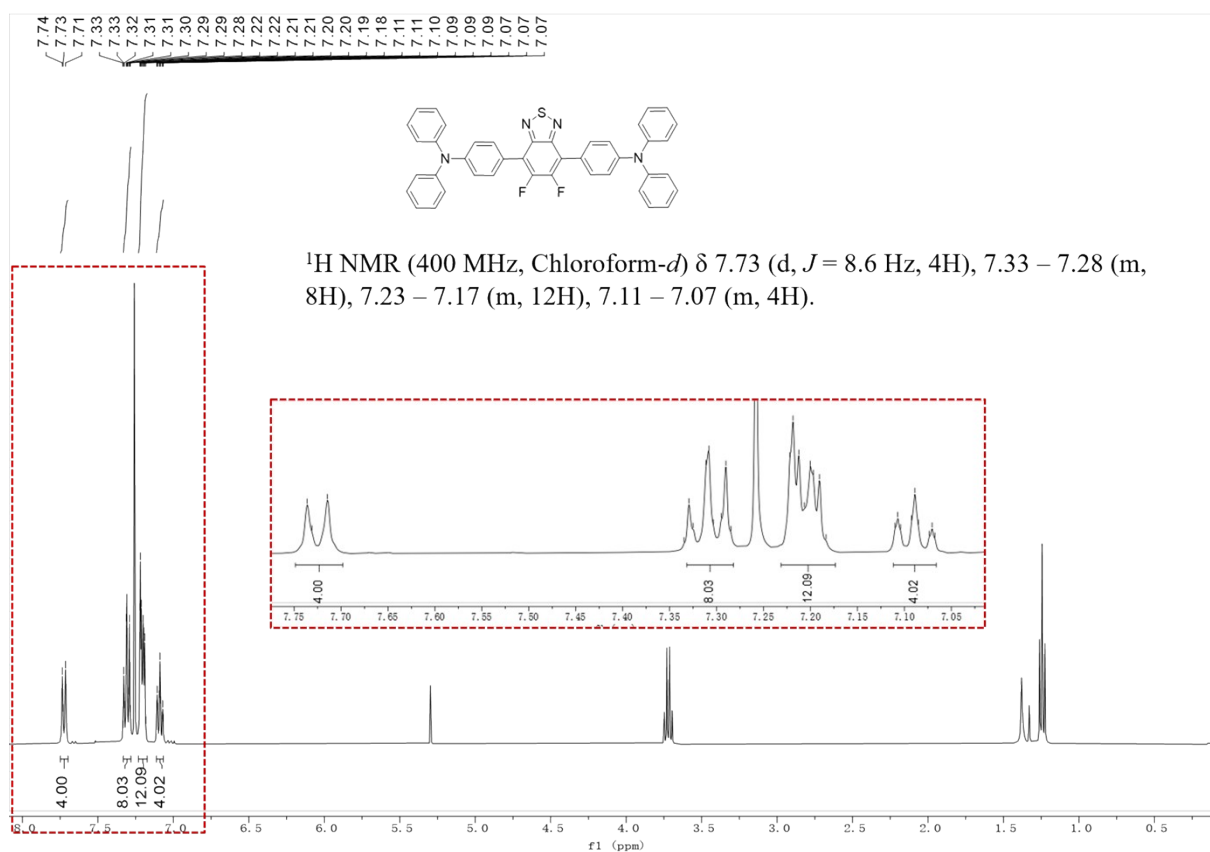

**$^1\text{H}$  NMR spectrum of TPA-FBT ( $\text{CDCl}_3$ )**

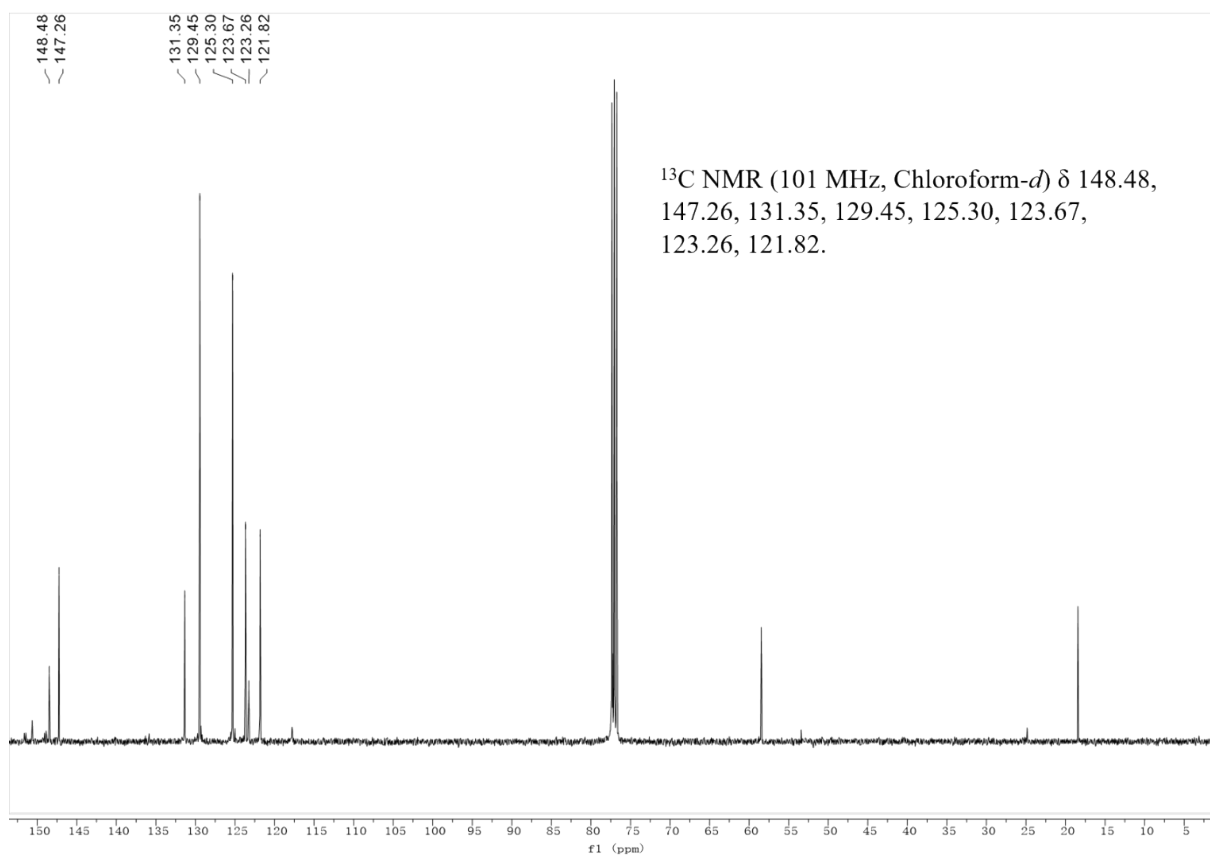

**$^{13}\text{C}$  NMR spectrum of TPA-FBT ( $\text{CDCl}_3$ )**

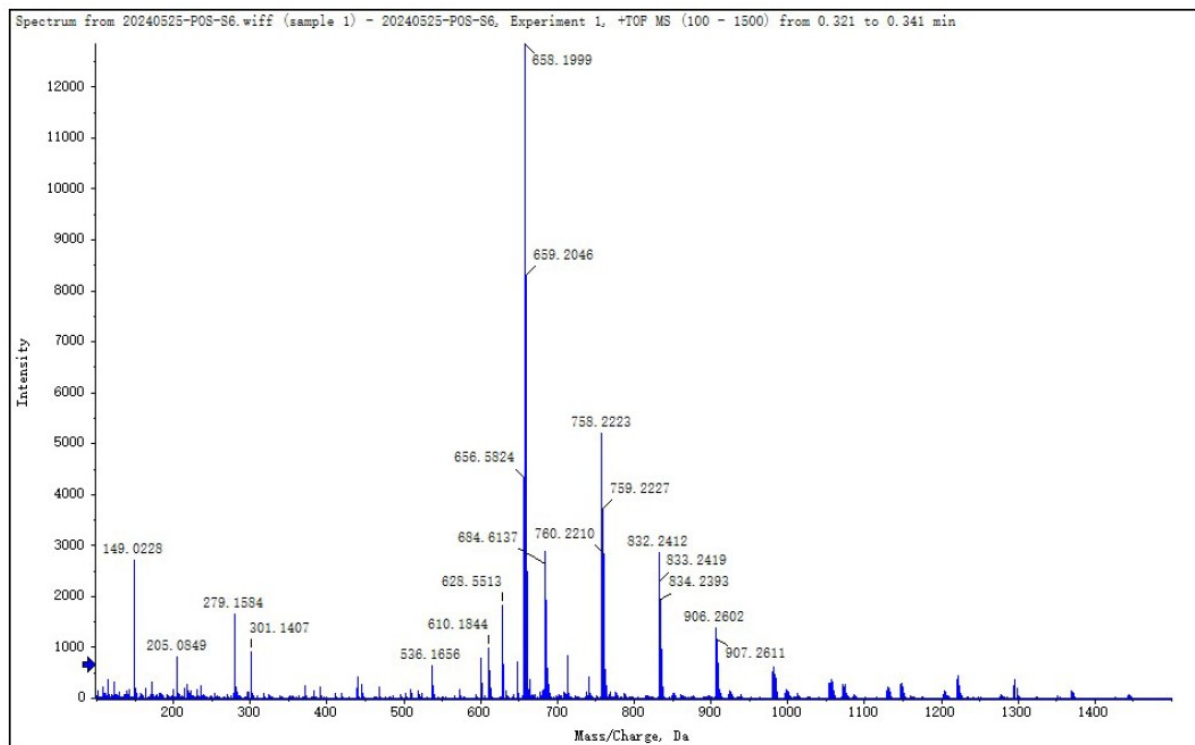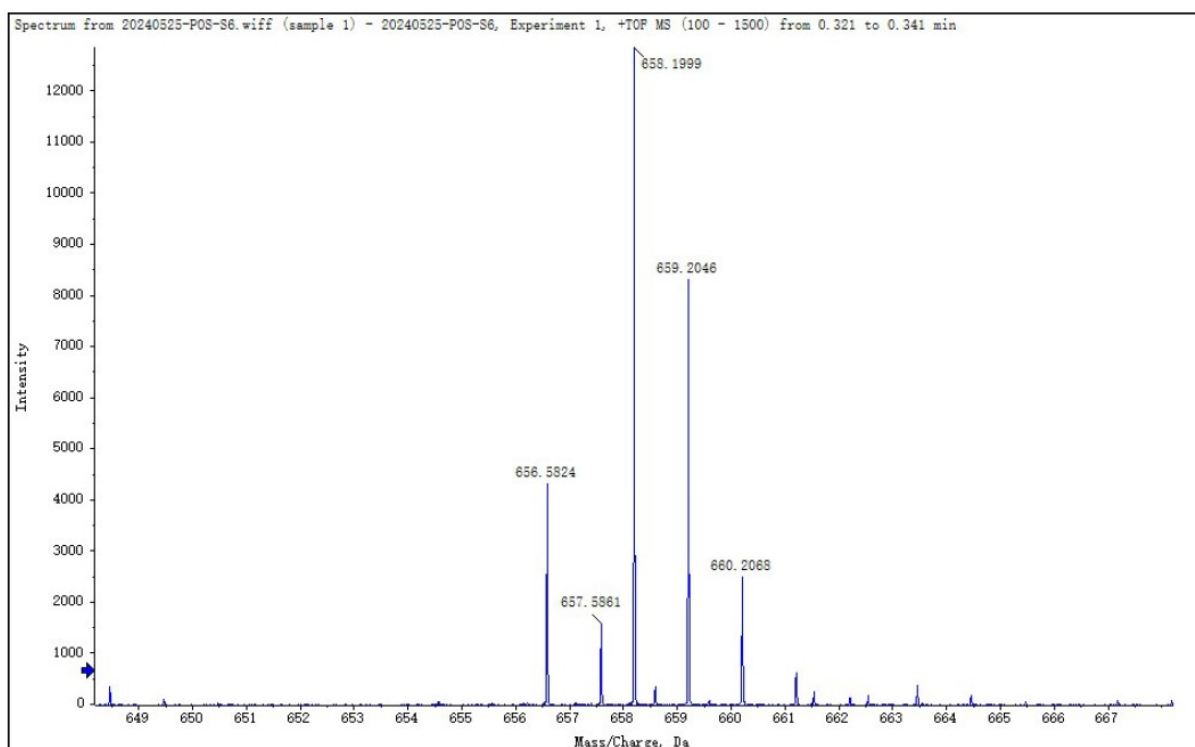

**HR-MS spectrum of TPA-FBT**

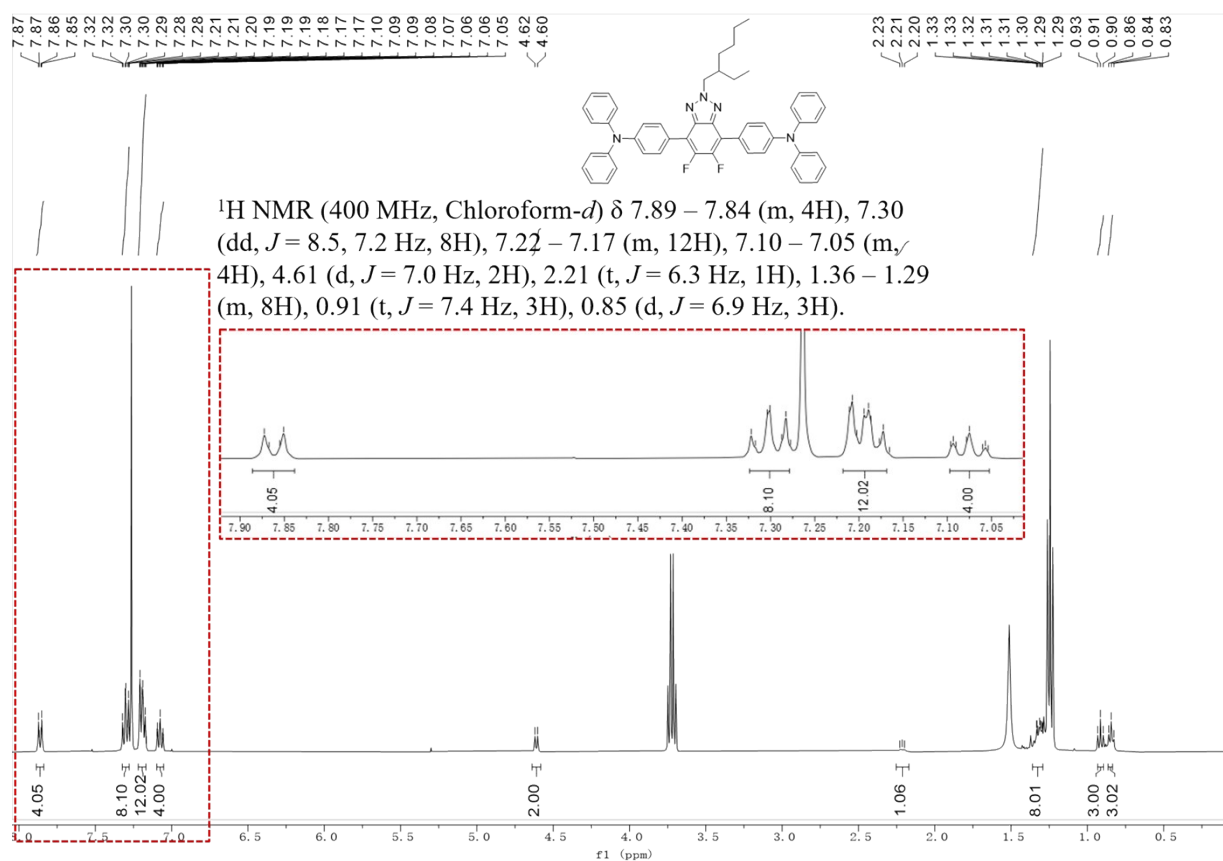

**<sup>1</sup>H NMR spectrum of TPA-FBTr (CDCl<sub>3</sub>)**

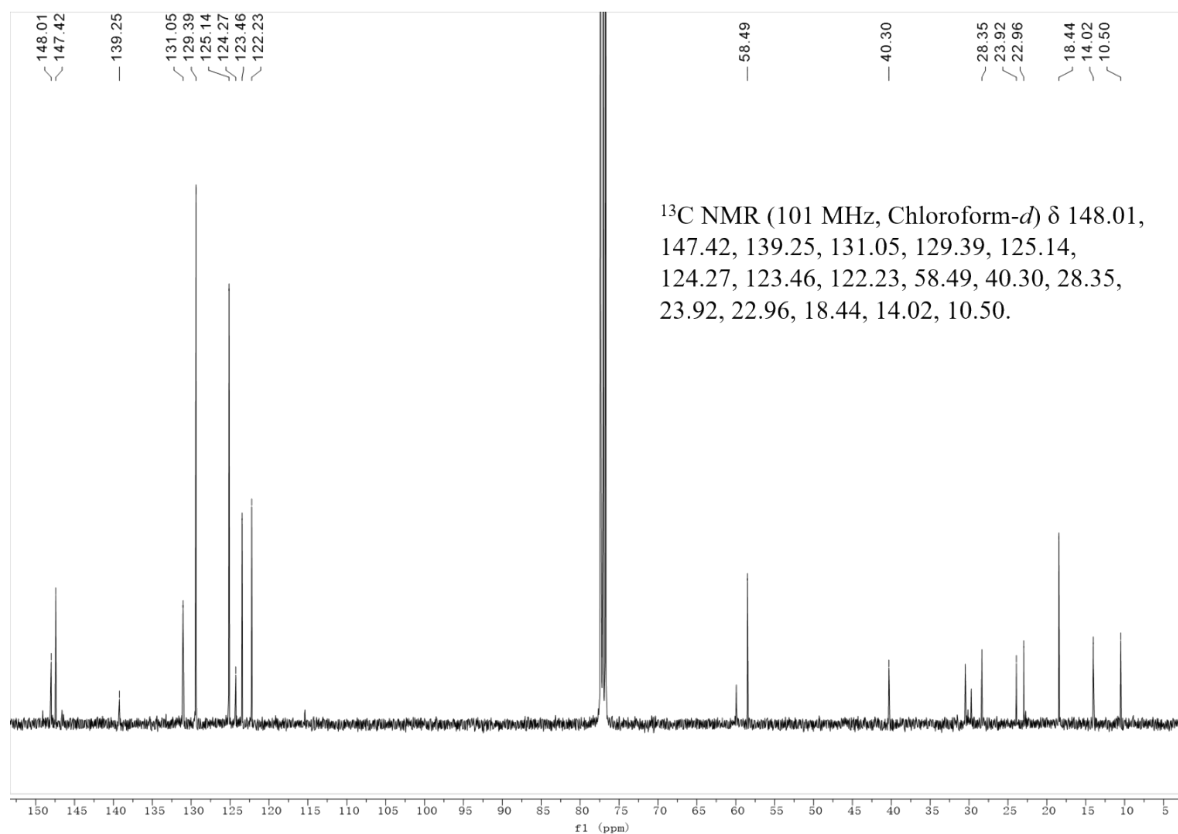

**<sup>13</sup>C NMR spectrum of TPA-FBTr (CDCl<sub>3</sub>)**



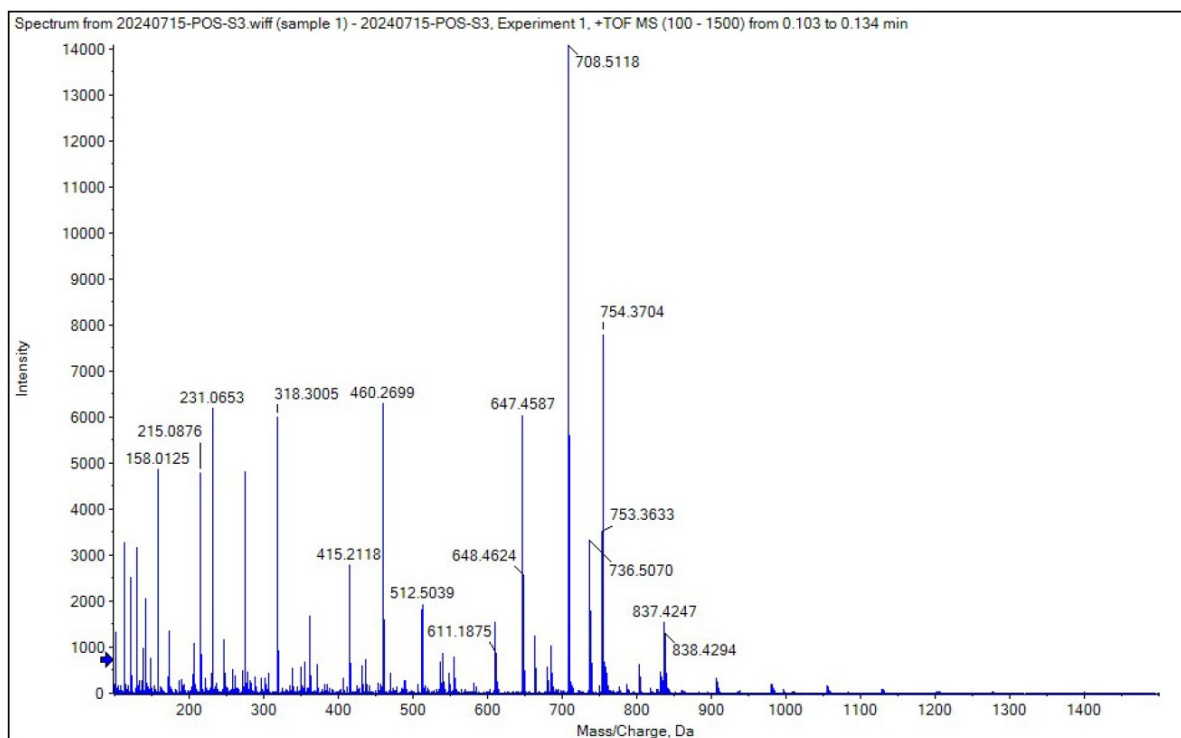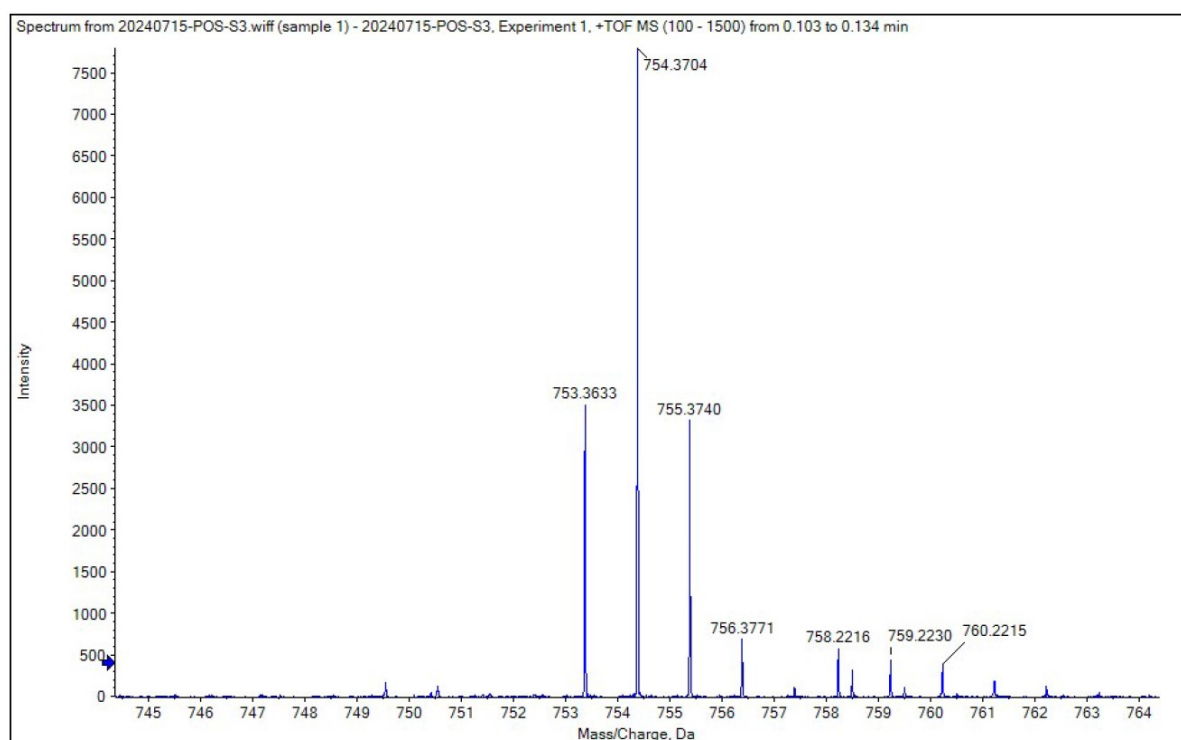

**HR-MS spectrum of TPA-FBTr**

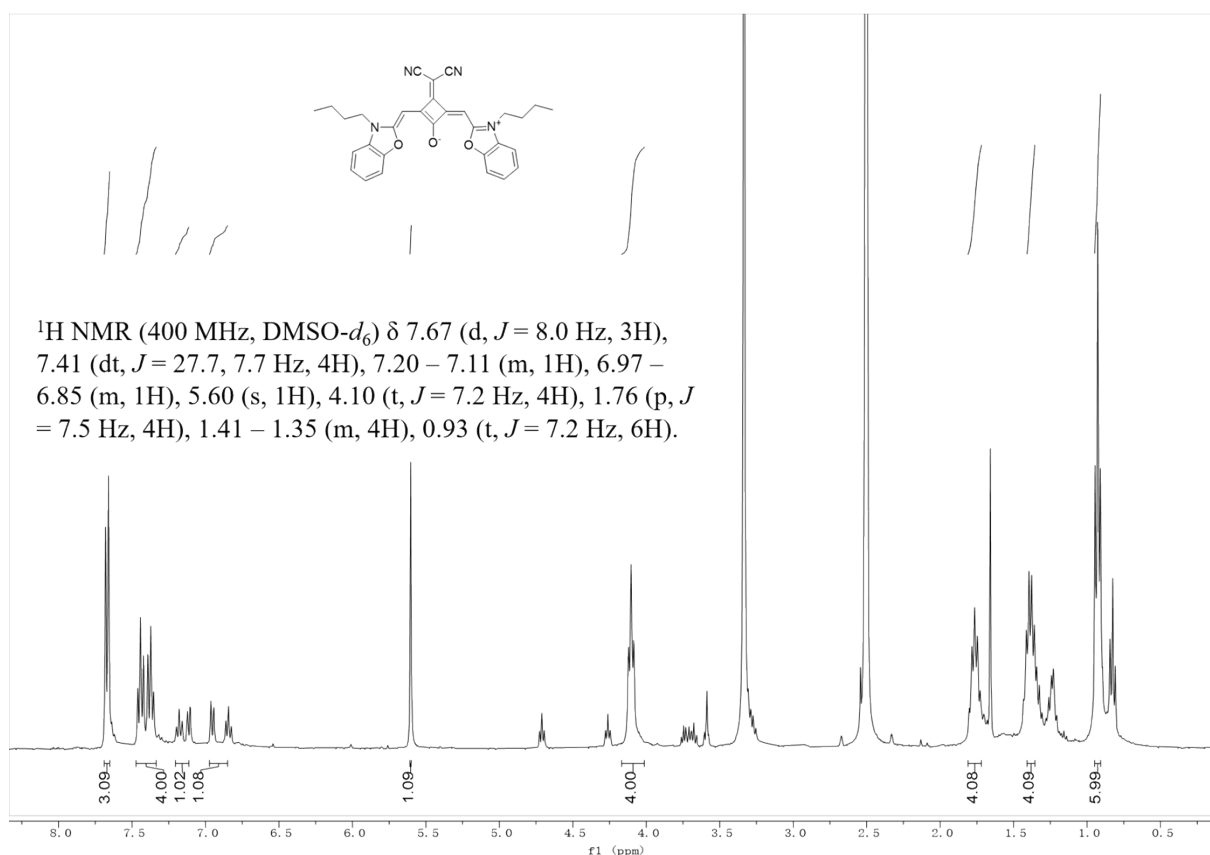

**$^1\text{H}$  NMR spectrum of SQ650 ( $\text{DMSO}-d_6$ )**

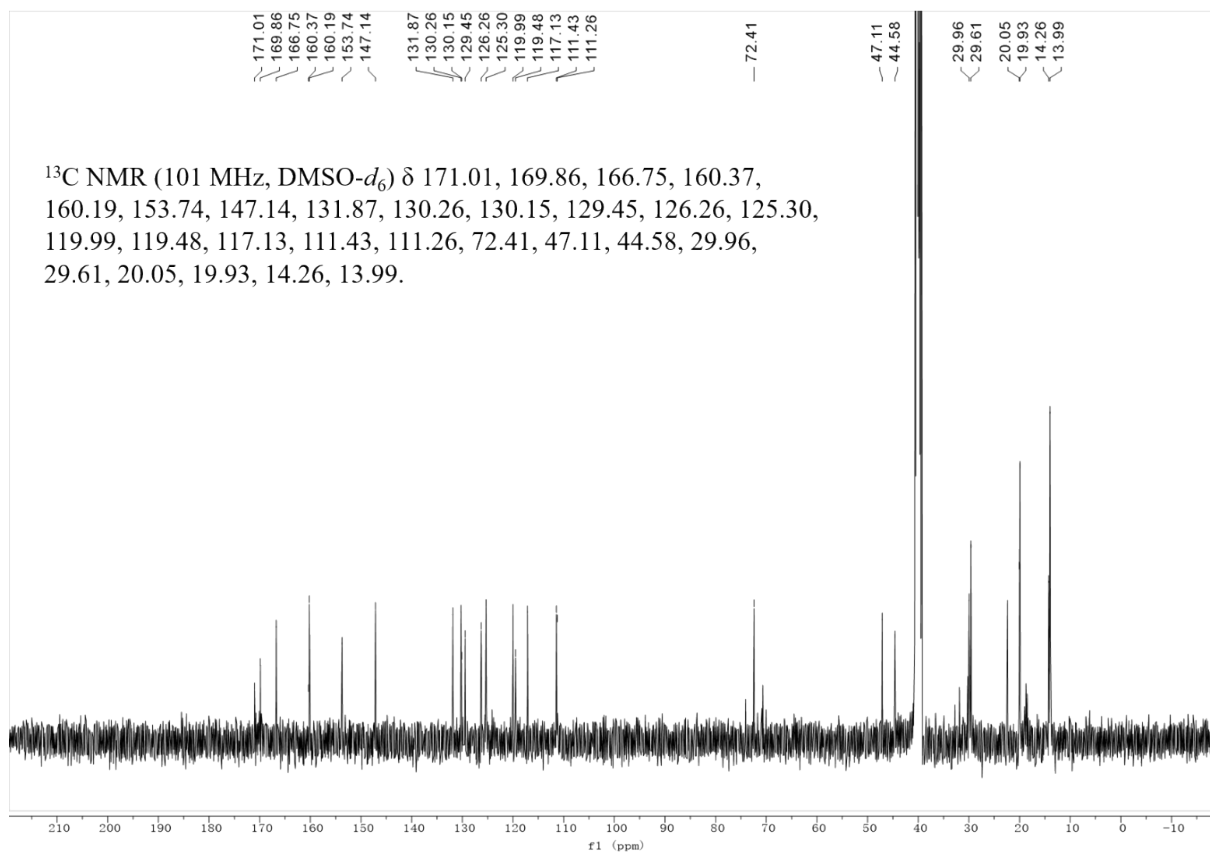

**$^{13}\text{C}$  NMR spectrum of SQ650 ( $\text{DMSO}-d_6$ )**

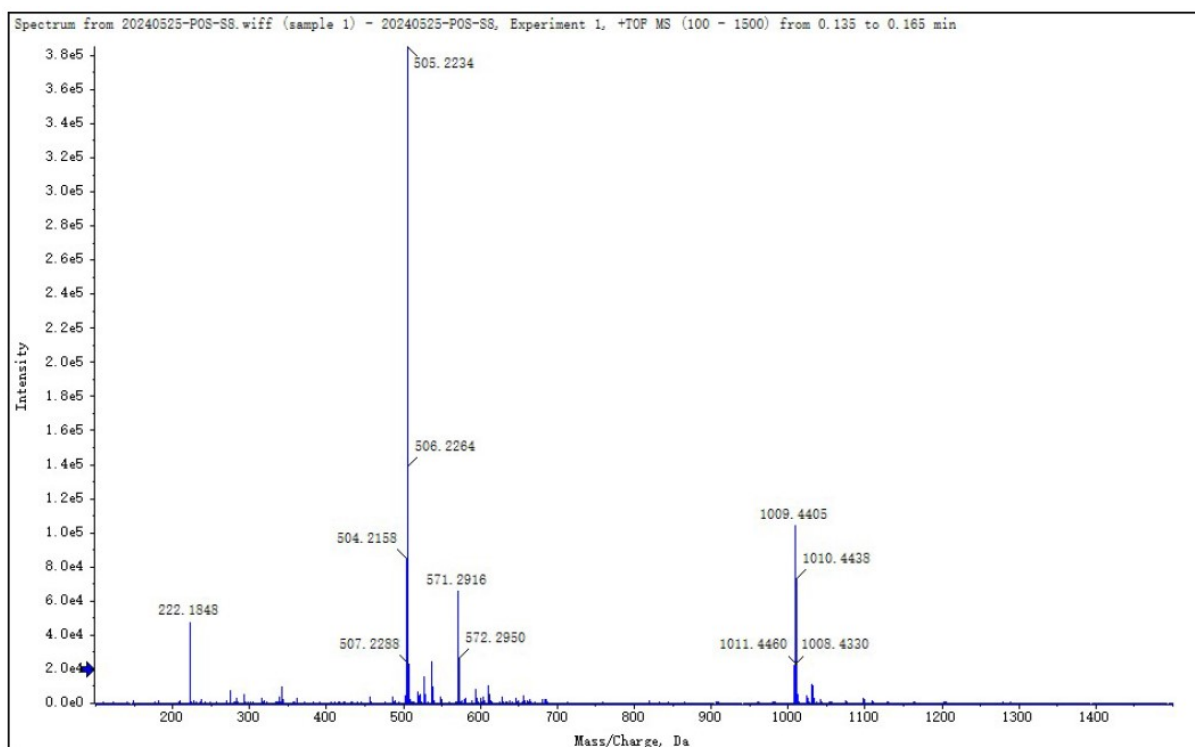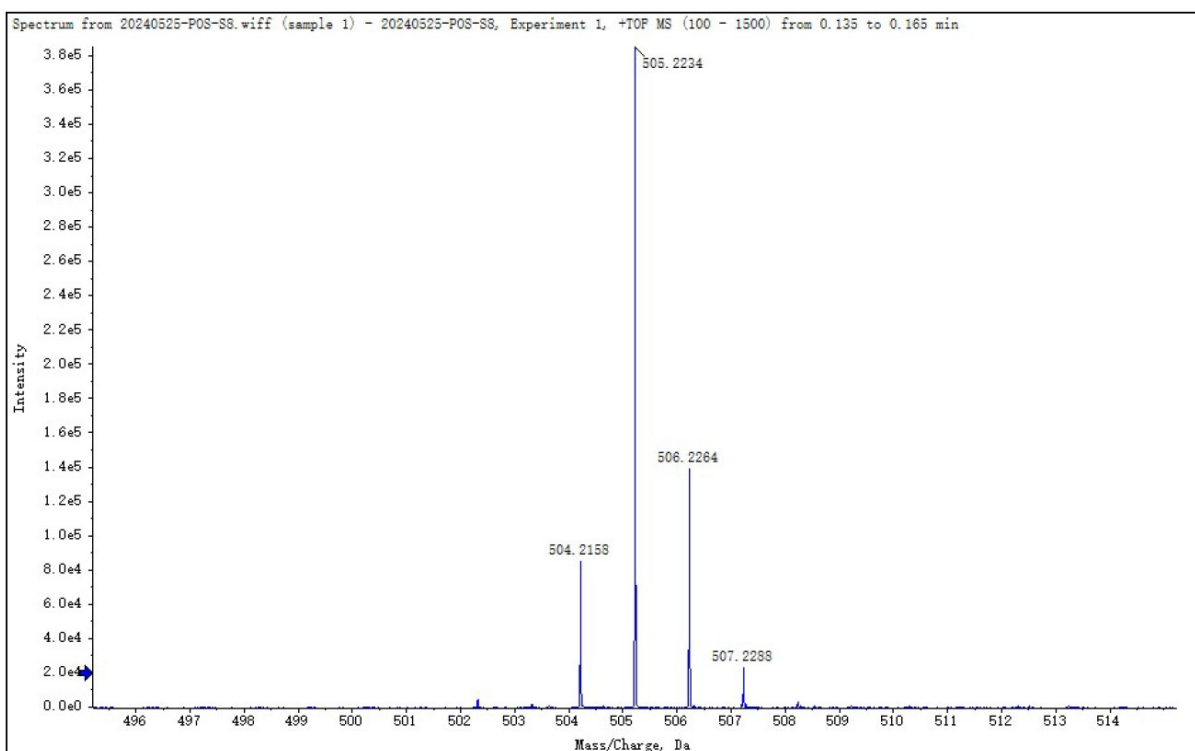

**HR-MS spectrum of SQ650**

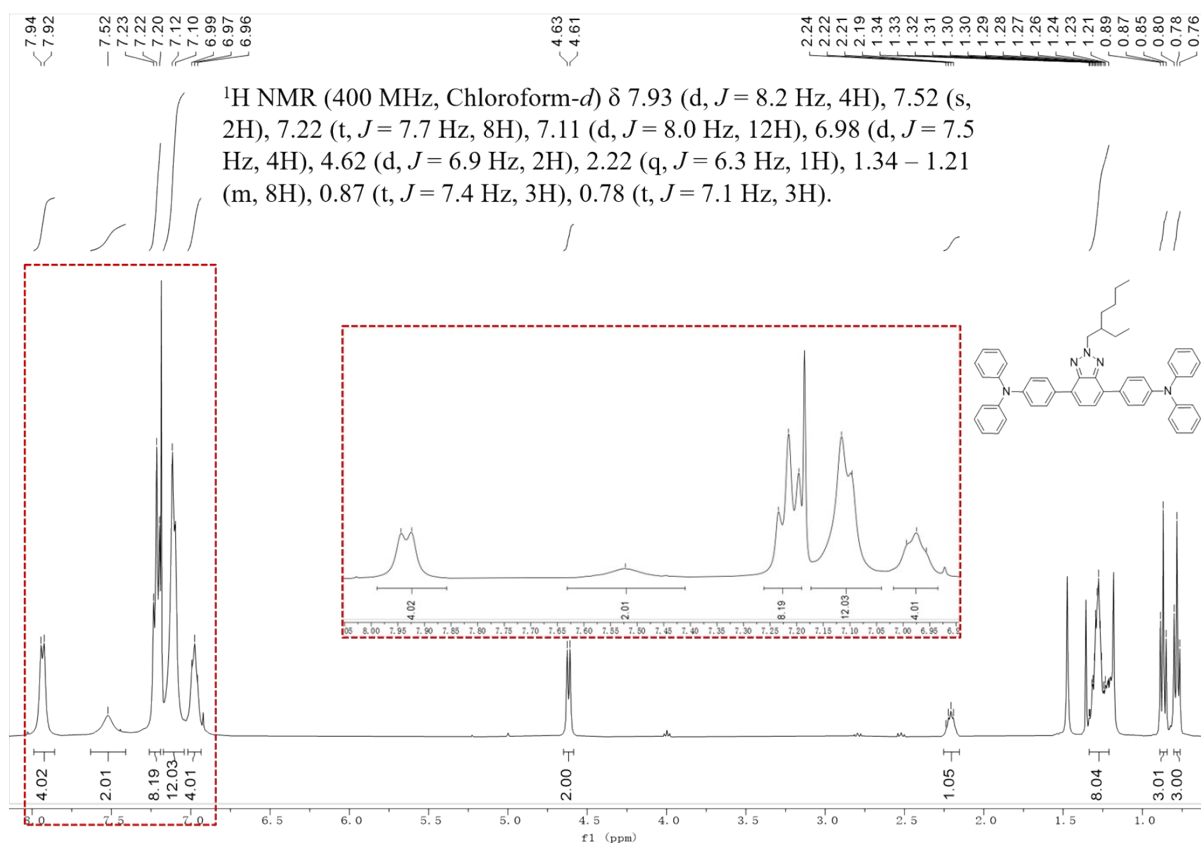

**<sup>1</sup>H NMR spectrum of TPA-BTsr (CDCl<sub>3</sub>)**

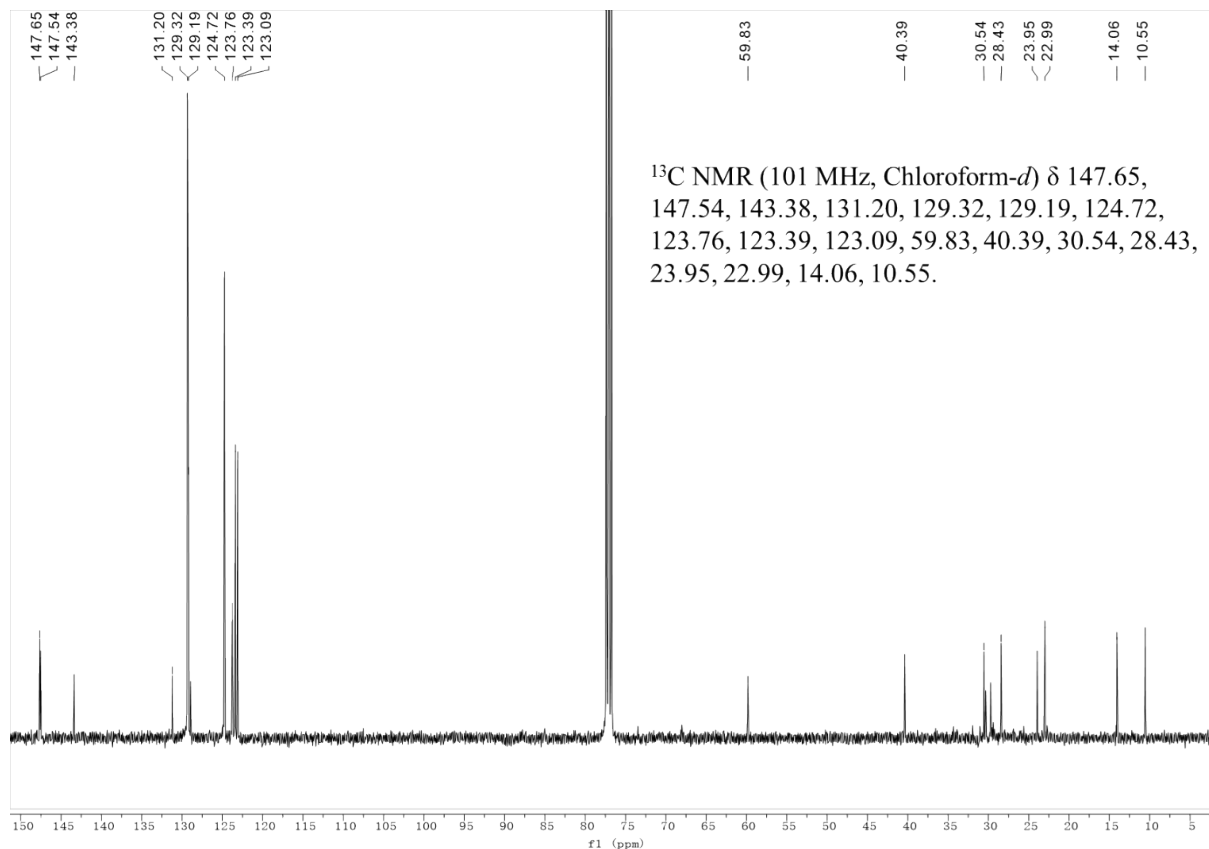

**<sup>13</sup>C NMR spectrum of TPA-BTsr (CDCl<sub>3</sub>)**

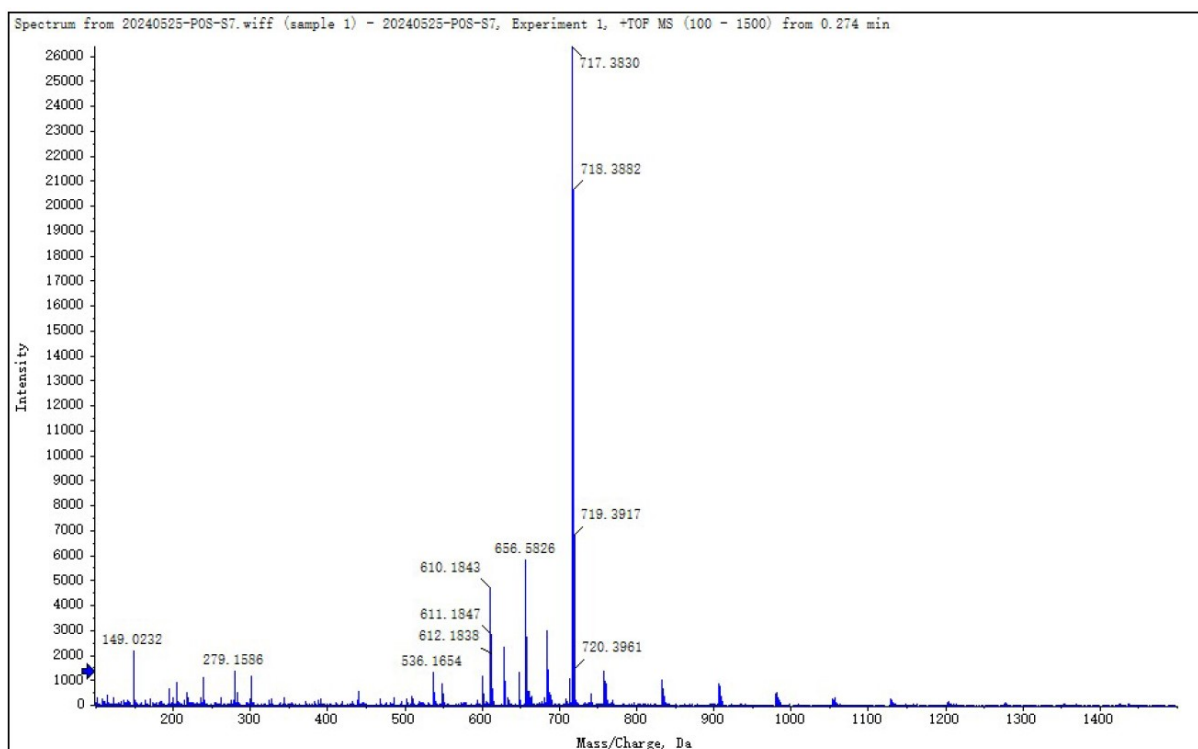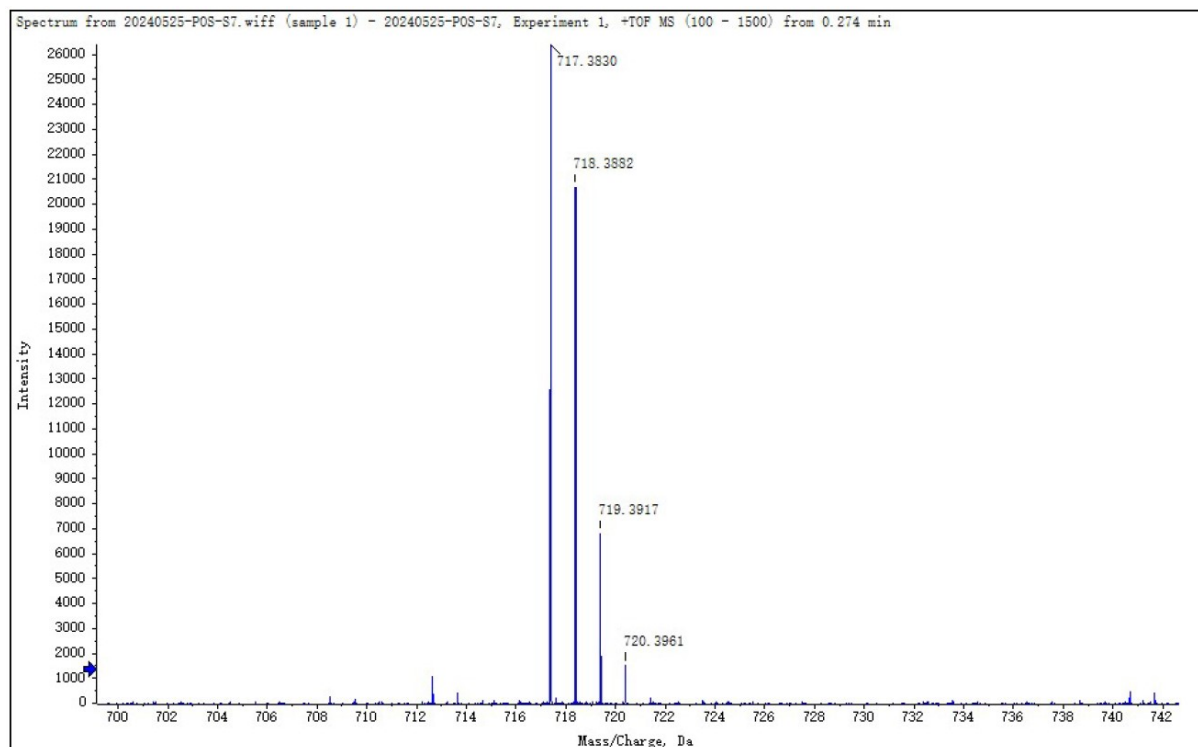

**HR-MS spectrum of TPA-BTsr**

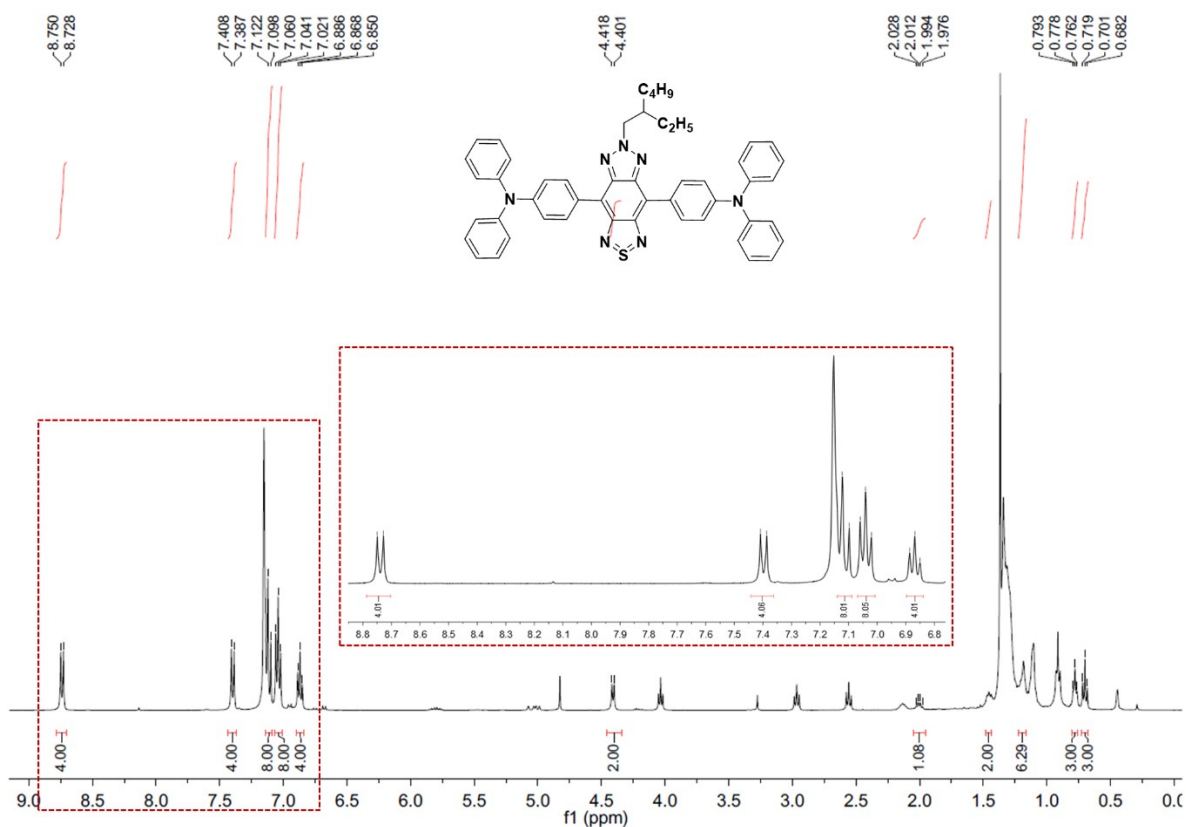

**<sup>1</sup>H NMR spectrum of TPA-TBZ (C<sub>6</sub>D<sub>6</sub>)**

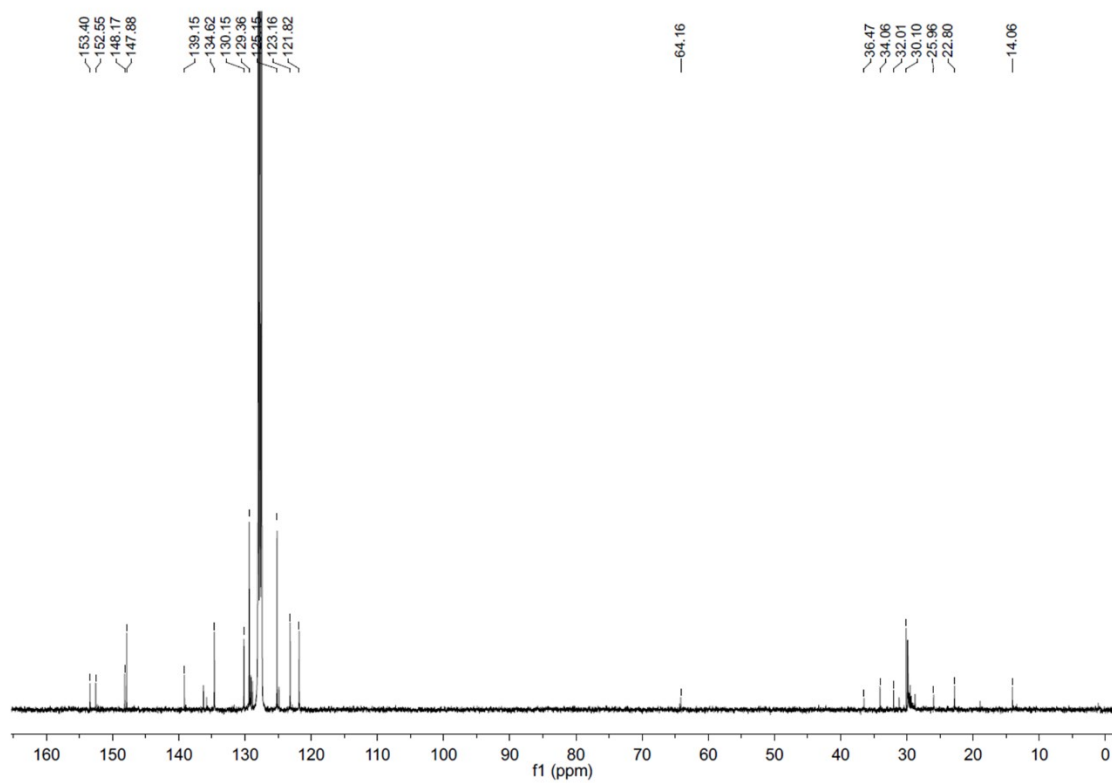

**<sup>13</sup>C NMR spectrum of TPA-TBZ (C<sub>6</sub>D<sub>6</sub>)**

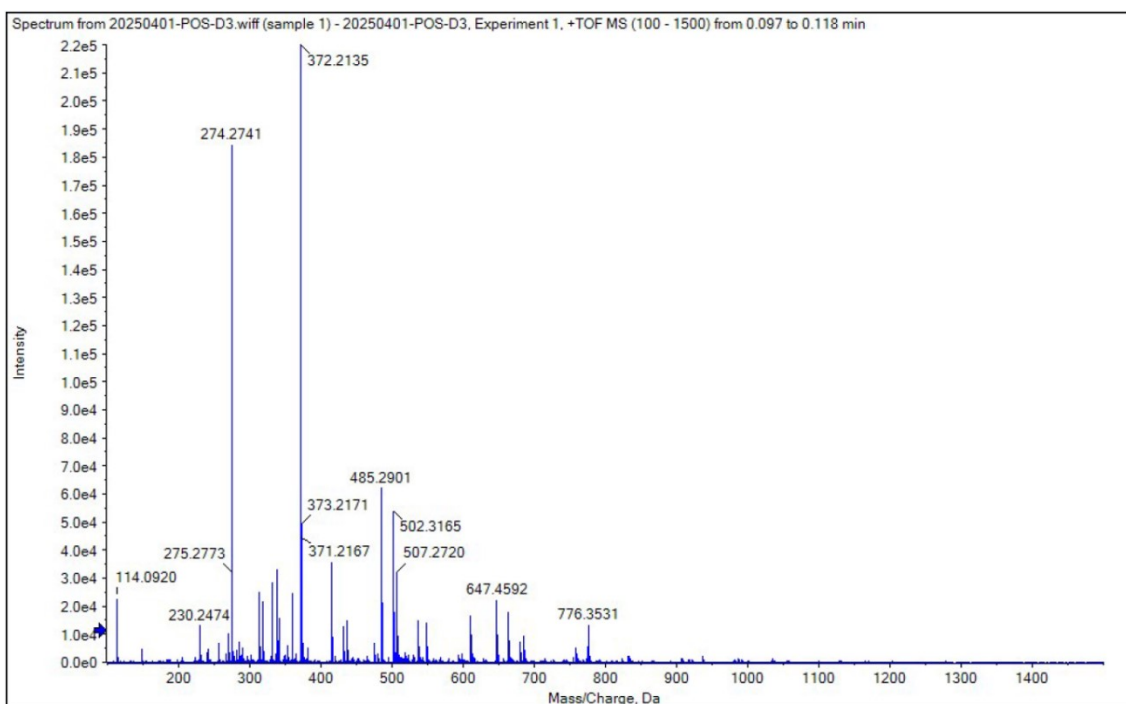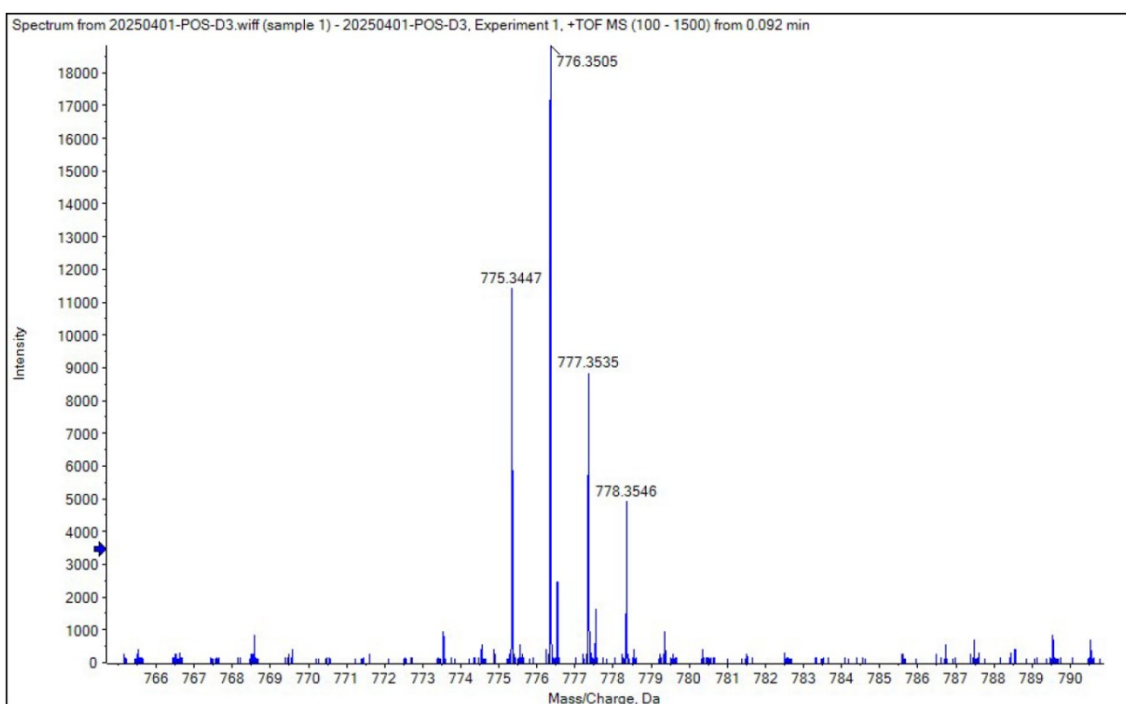

**HR-MS spectrum of TPA-TBZ**



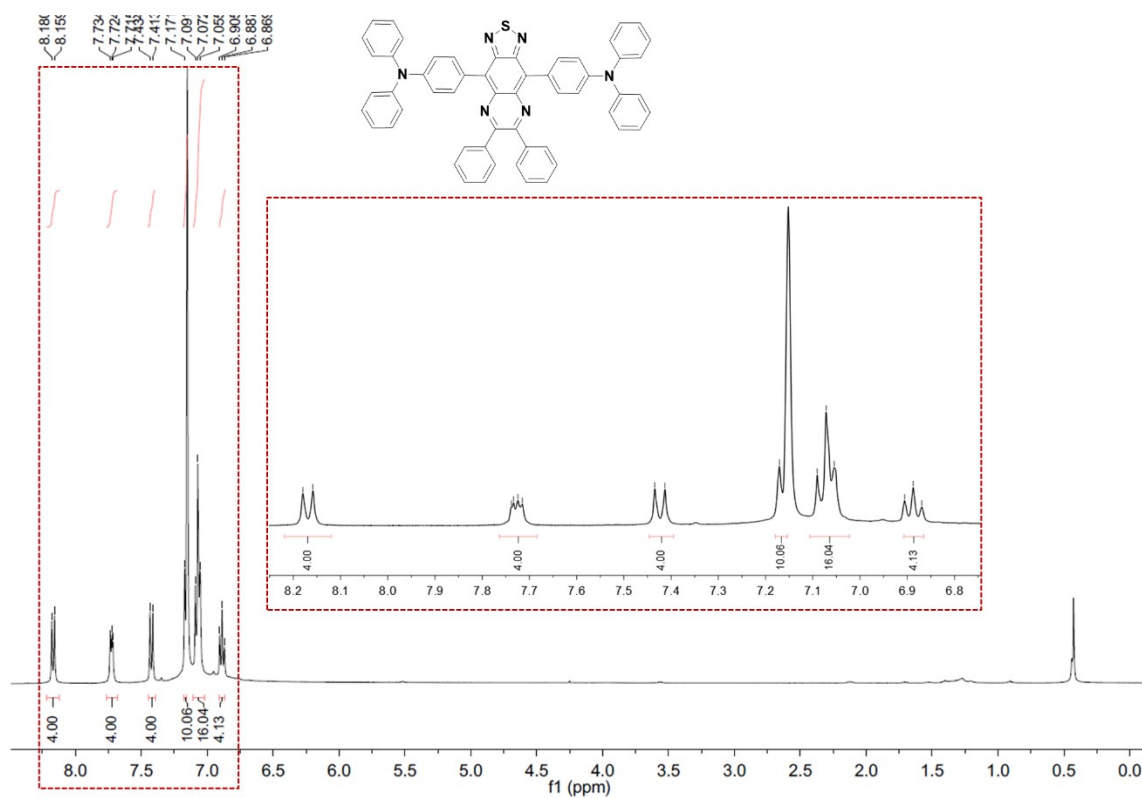

**<sup>1</sup>H NMR spectrum of TPA-QX (C<sub>6</sub>D<sub>6</sub>)**

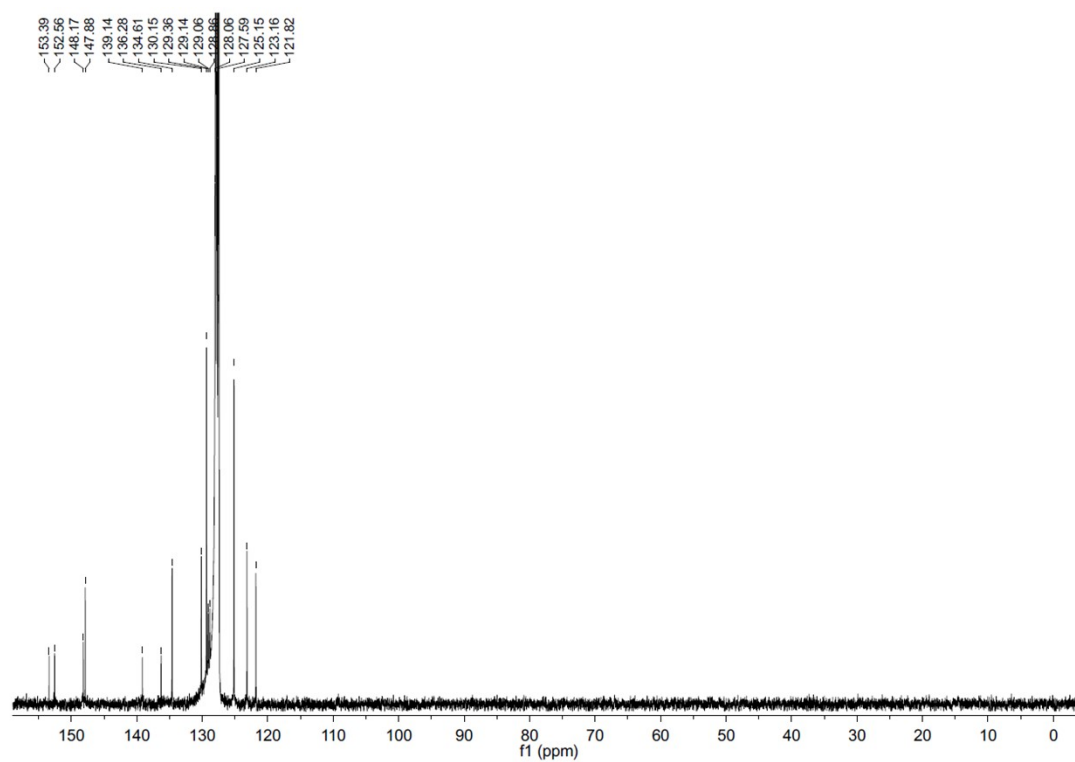

**<sup>13</sup>C NMR spectrum of TPA-QX (C<sub>6</sub>D<sub>6</sub>)**

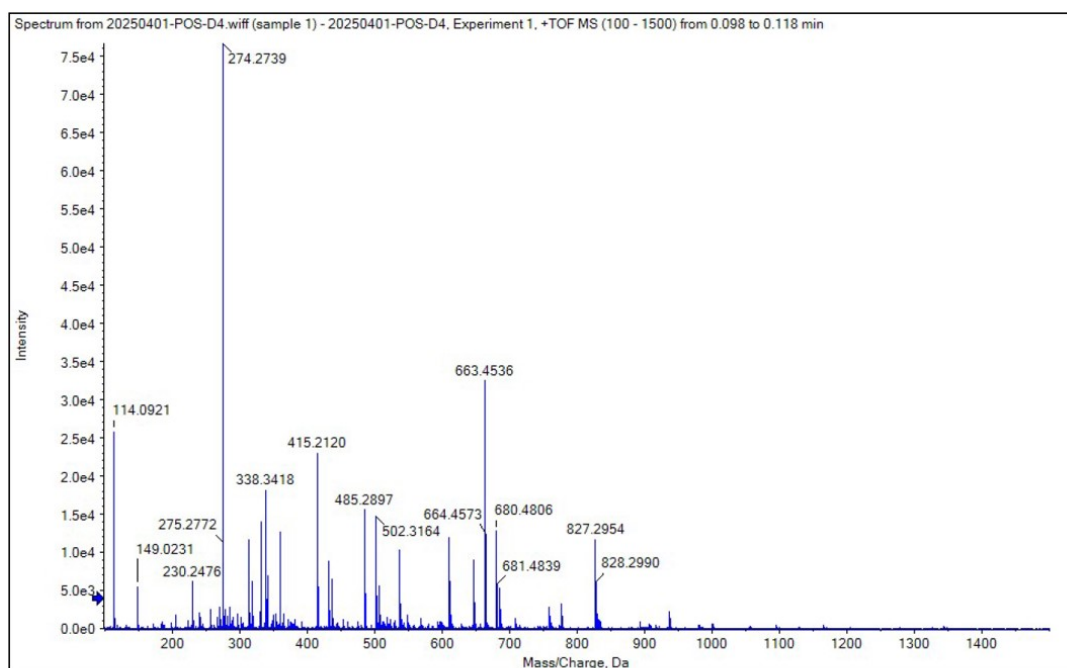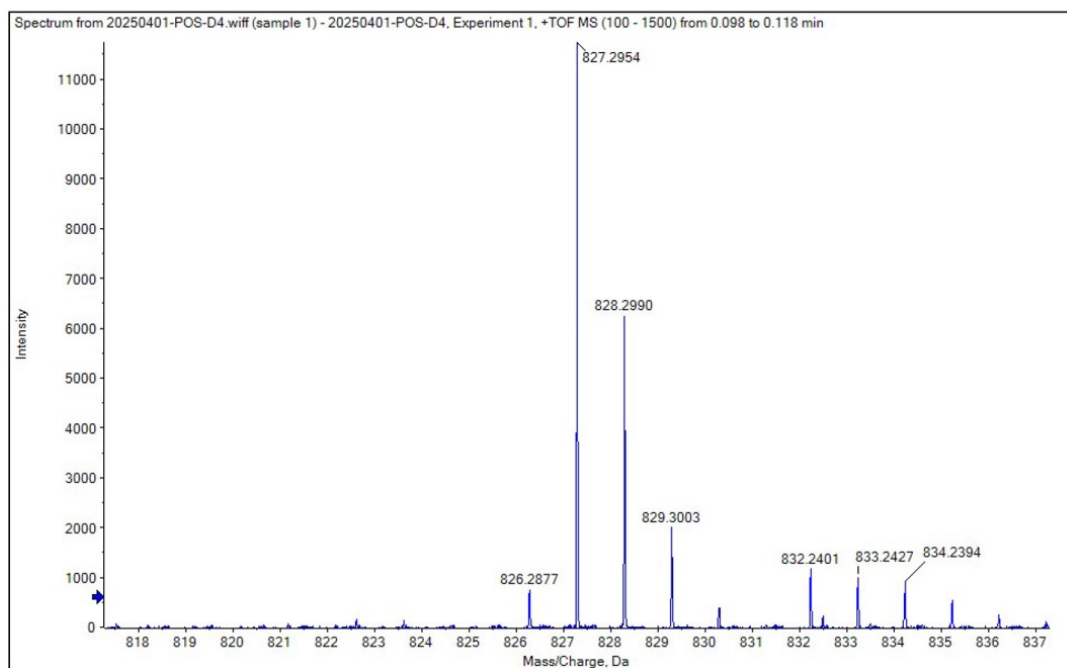

**HR-MS spectrum of TPA-QX**



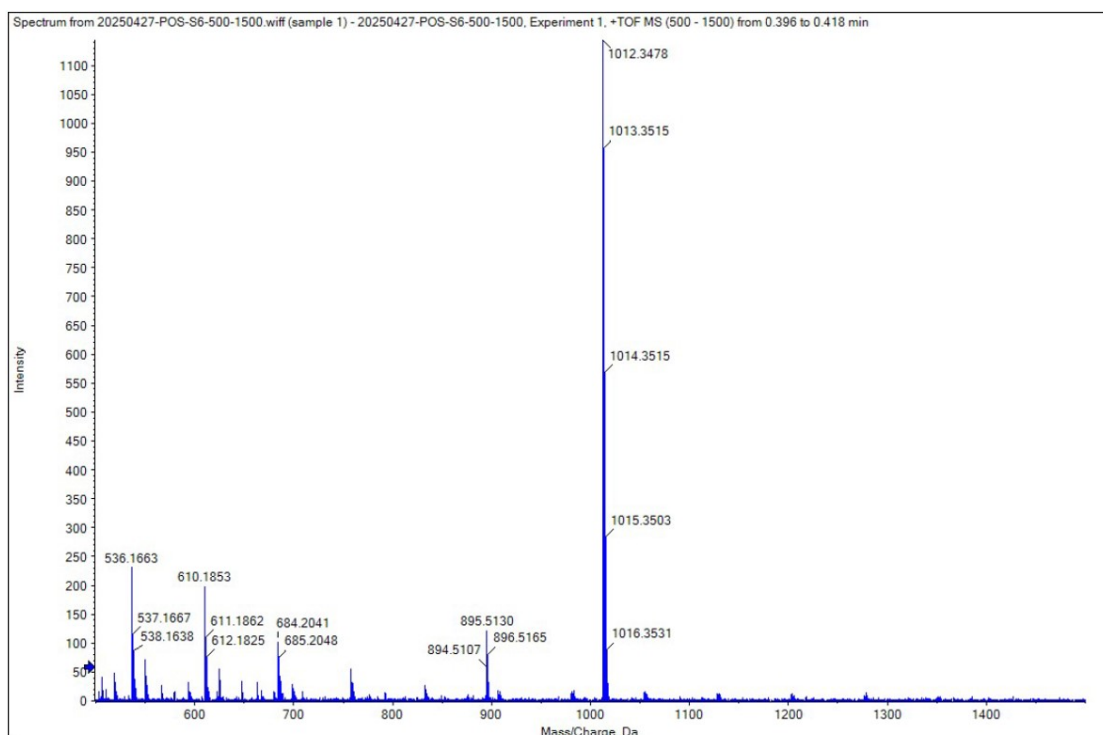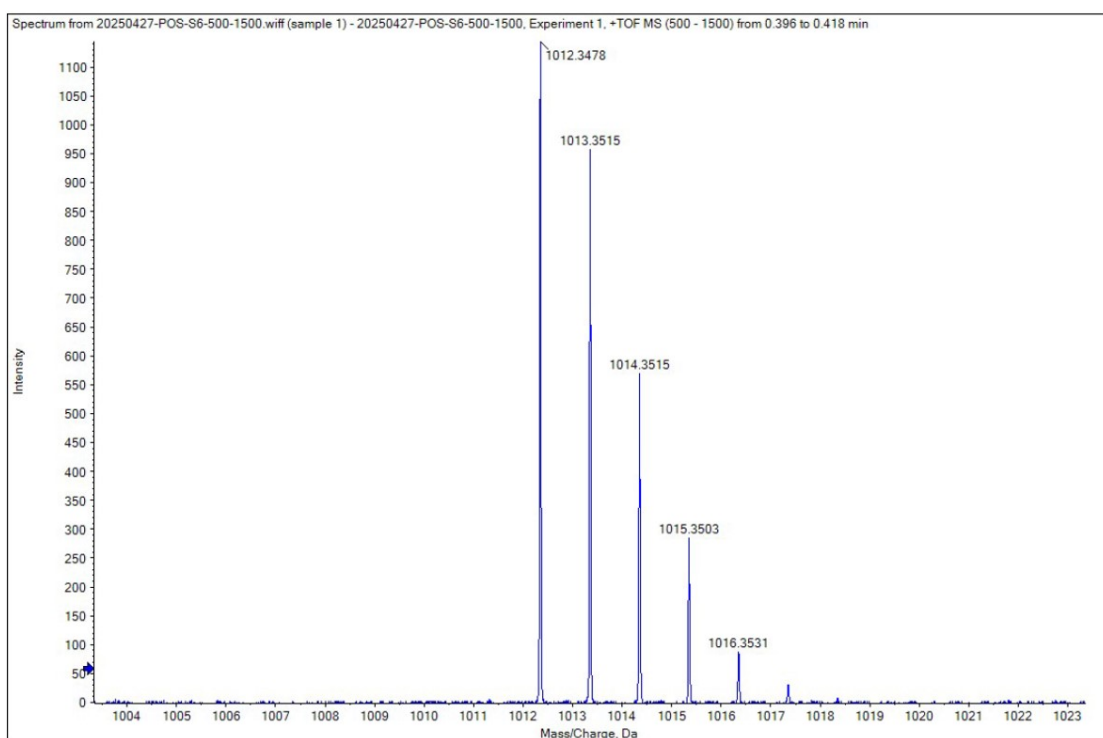

**HR-MS spectrum of TPAHT-BBT**

## Reference

- [1] X. Zhou, L. Zhao, K. Zhang, C. Yang, S. Li, X. Kang, G. Li, Q. Wang, H. Ji, M. Wu, J. Liu, Y. Qin, L. Wu, *Chem. Sci.* **2022**, *14*, 113-120.
- [2] K. Zhang, X. Zhou, S. Li, L. Zhao, W. Hu, A. Cai, Y. Zeng, Q. Wang, M. Wu, G. Li, J. Liu, H. Ji, Y. Qin, L. Wu, *Adv. Mater.* **2023**, *35*, e2305472.
- [3] Z. Feng, Y. Li, S. Chen, J. Li, T. Wu, Y. Ying, J. Zheng, Y. Zhang, J. Zhang, X. Fang, X. Yu, D. Zhang, B. Z. Tang, J. Qian, *Nat. Commun.* **2023**, *14*, 5017.
- [4] U. Mayerhö ffer, K. Deing, K. Gruß, H. Braunschweig, K. Meerholz, F. Würthner, *Angew. Chem. Int. Ed.* **2009**, *48*, 8776-8779.
- [5] Y. Yang, S. Wang, L. Lu, Q. Zhang, P. Yu, Y. Fan, F. Zhang, *Angew. Chem. Int. Ed.* **2020**, *59*, 18380-18385.
- [6] K. Rurack and M. Spieles, *Anal. Chem.* **2011**, *83*, 1232-1242.
- [7] R. M. Uppu, W. A. Pryor, *Anal. Biochem.* **1996**, *236*, 242-249.
- [8] Gaussian 09, Revision A.02, M. J. Frisch, G. W. Trucks, H. B. Schlegel, G. E. Scuseria, M. A. Robb, J. R. Cheeseman, G. Scalmani, V. Barone, G. A. Petersson, H. Nakatsuji, X. Li, M. Caricato, A. Marenich, J. Bloino, B. G. Janesko, R. Gomperts, B. Mennucci, H. P. Hratchian, J. V. Ortiz, A. F. Izmaylov, J. L. Sonnenberg, D. Williams-Young, F. Ding, F. Lipparini, F. Egidi, J. Goings, B. Peng, A. Petrone, T. Henderson, D. Ranasinghe, V. G. Zakrzewski, J. Gao, N. Rega, G. Zheng, W. Liang, M. Hada, M. Ehara, K. Toyota, R. Fukuda, J. Hasegawa, M. Ishida, T. Nakajima, Y. Honda, O. Kitao, H. Nakai, T. Vreven, K. Throssell, J. A. Montgomery, Jr., J. E. Peralta, F. Ogliaro, M. Bearpark, J. J. Heyd, E. Brothers, K. N. Kudin, V. N. Staroverov, T. Keith, R. Kobayashi, J. Normand, K. Raghavachari, A. Rendell, J. C. Burant, S. S. Iyengar, J. Tomasi, M. Cossi, J. M. Millam, M. Klene, C. Adamo, R. Cammi, J. W. Ochterski, R. L. Martin, K. Morokuma, O. Farkas, J. B. Foresman, and D. J. Fox, Gaussian, Inc., Wallingford CT, 2016.
- [9] T. Lu, F. Chen, *J. Comput. Chem.* **2012**, *33*, 580-592.

- [10] T. Lu, F. Chen, *J. Mol. Graph. Model.* **2012**, 38, 314-323.
